# Supplementary material
Source: Royal Society of Chemistry journal article supplement (doi:10.1039/d6nj00650g)
Supplement: d6nj00650g1.pdf [file d6nj00650g1.pdf]

## Electronic Supporting Information

### Reactivity Study of 4-Hydroxydithiocoumarin/4-Hydroxythiocoumarin with Vinyl Ether /Cyclic Vinyl Ether: Synthesis of Fused Novel Thiophene Derivatives Using CuO Nanoparticles

Devendra Kumar,<sup>a</sup> Ahmad Ali,<sup>a</sup> Mehak Sood,<sup>b</sup> Prasad V. Bharatam,<sup>b</sup> Abu Taleb Khan\*<sup>a</sup>

<sup>a</sup> Department of Chemistry, Indian Institute of Technology Guwahati, Guwahati-781039, Assam, India.

E-mail: [atk@iitg.ac.in](mailto:atk@iitg.ac.in)

<sup>b</sup> National Institute of Pharmaceutical Education and Research, S. A. S. Nagar, Mohali, 160062, Punjab, India.

### Table of Contents:

|                                                                                    |         |
|------------------------------------------------------------------------------------|---------|
| <b>S1:</b> X-ray crystallographic data of compound <b>8a</b> and <b>10c</b> .....  | P2-P3   |
| <b>S2:</b> Characterization Table all compounds.....                               | P4-P9   |
| <b>S3:</b> <sup>1</sup> H, <sup>13</sup> C spectrum and HRMS of all compounds..... | P10-P89 |
| <b>S4:</b> DFT Calculation Energy.....                                             | P90-97  |

**S1: X-ray crystallographic data of compound 8a and 10c**

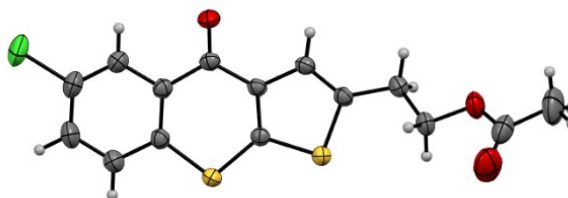

ORTEP Diagram of compound **8a** with CCDC number [2513822](#)

| Entry | Identification Code   | Compound 8a                                                     |
|-------|-----------------------|-----------------------------------------------------------------|
| 01    | Empirical formula     | C <sub>15</sub> H <sub>11</sub> ClO <sub>3</sub> S <sub>2</sub> |
| 02    | Formula weight        | 338.81                                                          |
| 03    | Temperature           | 298 K                                                           |
| 04    | Wavelength            | 0.71073                                                         |
| 05    | Crystal system        | Monoclinic                                                      |
| 06    | Space group           | p-1                                                             |
| 07    | Cell length           | a 17.1285 (14)<br>b 4.0509 (3)<br>c 22.3190 (18)                |
| 08    | Cell angle            | $\alpha = 90$<br>$\beta = 106.564 (2)$<br>$\gamma = 90$         |
| 09    | Cell volume           | 1484.4 (2)                                                      |
| 10    | Density               | 1.516 g/cm <sup>3</sup>                                         |
| 11    | Completeness to theta | 0.997                                                           |
| 12    | Index ranges          | h = 20<br>k = 4<br>l = 26                                       |
| 13    | Theta (Max)           | 24.995                                                          |
| 14    | Cell formula units Z  | 4                                                               |
| 15    | CCDC no               | <a href="#">2513822</a>                                         |

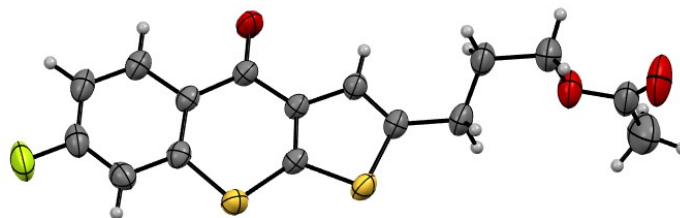

ORTEP Diagram of compound **10c** with CCDC number [2518535](#)

| Entry | Identification Code   | Compound 10c                                                            |
|-------|-----------------------|-------------------------------------------------------------------------|
| 01    | Empirical formula     | C <sub>16</sub> H <sub>13</sub> FO <sub>3</sub> S <sub>2</sub>          |
| 02    | Formula weight        | 336.38                                                                  |
| 03    | Temperature           | 299 K                                                                   |
| 04    | Wavelength            | 0.71073                                                                 |
| 05    | Crystal system        | Triclinic                                                               |
| 06    | Space group           | p-1                                                                     |
| 07    | Cell length           | a 7.4957 (4)<br>b 7.5172 (4)<br>c 13.7183 (7)                           |
| 08    | Cell angle            | $\alpha$ = 91.097 (2)<br>$\beta$ = 90.856 (1)<br>$\gamma$ = 101.684 (2) |
| 09    | Cell volume           | 756.69 (7)                                                              |
| 10    | Density               | 1.476 g/cm <sup>3</sup>                                                 |
| 11    | Completeness to theta | 0.995                                                                   |
| 12    | Index ranges          | h = 9<br>k = 9<br>l = 16                                                |
| 13    | Theta (Max)           | 26.029                                                                  |
| 14    | Cell formula units Z  | 2                                                                       |
| 15    | CCDC no               | <a href="#">2518535</a>                                                 |

## S2: Characterization Table

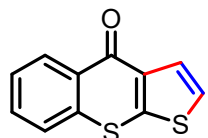

**4H-thieno[2,3-*b*]thiochromen-4-one (4a).** A brown solid (33 mg, yield 74%), mp 154 °C,  $^1\text{H}$  NMR (500 MHz,  $\text{CDCl}_3$ )  $\delta$  8.69 (d,  $J = 7.9$  Hz, 1H), 7.87 (d,  $J = 5.2$  Hz, 1H), 7.63 (s, 2H), 7.57 – 7.53 (m, 1H), 7.37 (d,  $J = 5.2$  Hz, 1H),  $^{13}\text{C}$  NMR (125 MHz,  $\text{CDCl}_3$ )  $\delta$  175.8, 144.6, 136.5, 134.7, 131.5, 129.8, 129.6, 126.9, 126.7, 126.0, 123.5. IR (KBr)  $\nu_{\text{max}}/\text{cm}^{-1}$  2918 (C–H), 1632 (C=O); HRMS (ESI):  $m/z$  ( $M + \text{H}^+$ ) calculated for  $\text{C}_{11}\text{H}_7\text{OS}_2$  218.9933; found 218.9933.

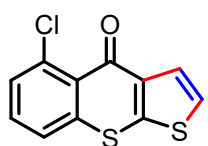

**5-chloro-4H-thieno[2,3-*b*]thiochromen-4-one (4b).** A brown solid (37 mg, yield 72%), mp 174 °C,  $^1\text{H}$  NMR (500 MHz,  $\text{CDCl}_3$ )  $\delta$  7.80 (d,  $J = 3.8$  Hz, 1H), 7.55 – 7.53 (d, 2H), 7.46 (t,  $J = 7.8$  Hz, 1H), 7.34 (d,  $J = 3.9$  Hz, 1H).  $^{13}\text{C}$  NMR (125 MHz,  $\text{CDCl}_3$ )  $\delta$  175.5, 141.7, 139.8, 137.4, 136.3, 131.2, 131.0, 127.4, 126.7, 125.4, 124.0. IR (KBr)  $\nu_{\text{max}}/\text{cm}^{-1}$  2919 (C–H), 1633 (C=O); HRMS (ESI):  $m/z$  ( $M + \text{H}^+$ ) calculated for  $\text{C}_{11}\text{H}_6\text{ClOS}_2$  252.9543; found 252.9536.

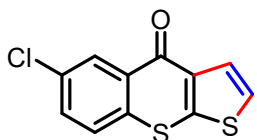

**6-chloro-4H-thieno[2,3-*b*]thiochromen-4-one (4c).** A brown solid (35 mg, yield 70%), mp 175 °C,  $^1\text{H}$  NMR (500 MHz,  $\text{CDCl}_3$ )  $\delta$  8.65 (s, 1H), 7.87 – 7.85 (m, 1H), 7.58 (t, 2H), 7.40 – 7.39 (m, 1H),  $^{13}\text{C}$  NMR (125 MHz,  $\text{CDCl}_3$ )  $\delta$  174.7, 144.7, 134.7, 134.6, 133.5, 132.0, 131.2, 129.3, 127.5, 126.8, 124.2. IR (KBr)  $\nu_{\text{max}}/\text{cm}^{-1}$  2923 (C–H), 1627 (C=O); HRMS (ESI):  $m/z$  ( $M + \text{H}^+$ ) calculated for  $\text{C}_{11}\text{H}_6\text{ClOS}_2$  252.9543; found 252.9532.

**7-chloro-4H-thieno[2,3-*b*]thiochromen-4-one (4d).** A yellowish brown solid (35 mg, yield 69%), mp 180 °C  $^1\text{H}$  NMR (500 MHz,  $\text{CDCl}_3$ )  $\delta$  8.60 (d,  $J = 8.7$  Hz, 1H), 7.85 (d,  $J = 5.4$  Hz, 1H), 7.62 (d,  $J = 2.0$  Hz, 1H), 7.49 (dd,  $J = 8.7, 2.0$  Hz, 1H), 7.39 (d,  $J = 5.4$  Hz, 1H).  $^{13}\text{C}$  NMR (125 MHz,  $\text{CDCl}_3$ )  $\delta$  175.1, 144.1, 138.4, 138.0, 134.8, 131.2, 128.4, 127.7, 126.8, 125.5, 124.2. IR (KBr)  $\nu_{\text{max}}/\text{cm}^{-1}$  2920 (C–H), 1640 (C=O); HRMS (ESI):  $m/z$  ( $M + \text{H}^+$ ) calculated for  $\text{C}_{11}\text{H}_6\text{ClOS}_2$  252.9543; found 252.9528.

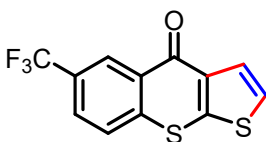

**6-(trifluoromethyl)-4H-thieno[2,3-*b*]thiochromen-4-one (4e).** A yellow solid (38 mg, yield 75%), mp 168 °C  $^1\text{H}$  NMR (500 MHz,  $\text{CDCl}_3$ )  $\delta$  8.95 (s, 1H), 7.88 (s, 1H), 7.83 (d,  $J = 7.9$  Hz, 1H), 7.75 (d,  $J = 8.0$  Hz, 1H), 7.44 (s, 1H).  $^{13}\text{C}$  NMR (125 MHz,  $\text{CDCl}_3$ )  $\delta$  174.8, 144.2, 140.2, 134.9, 130.1, 129.5 (q,  $J = 33.4$  Hz), 127.6, (q,  $J = 3.4$  Hz), 127.2 (q,  $J = 4$  Hz), 127.1, 126.9, 124.6.

123.7 (q,  $J = 270.1$  Hz).  $^{19}\text{F}$  NMR (471 MHz,  $\text{CDCl}_3$ )  $\delta$  -62.56. IR (KBr)  $\nu_{\text{max}}/\text{cm}^{-1}$  2922 (C–H), 1661 (C=O), 1264 (C–O); HRMS (ESI):  $m/z$  ( $\text{M} + \text{H}^+$ ) calculated for  $\text{C}_{12}\text{H}_6\text{F}_3\text{OS}_2$  286.9807; found 286.9797.

**7-fluoro-4*H*-thieno[2,3-*b*]thiochromen-4-one (4f).** A light yellow solid (39 mg, yield 78%), mp 159 °C  $^1\text{H}$  NMR (500 MHz,  $\text{CDCl}_3$ )  $\delta$  8.70 (t,  $J = 6.8$  Hz, 1H), 7.85 (d,  $J = 3.8$  Hz, 1H), 7.39 (d,  $J = 4.7$  Hz, 1H), 7.32 (d,  $J = 8.6$  Hz, 1H), 7.24 (s, 1H),  $^{13}\text{C}$  NMR (125 MHz,  $\text{CDCl}_3$ )  $\delta$  175.0, 164.1 (d,  $J = 253.7$  Hz), 144.0, 138.8 (d,  $J = 10$  Hz), 134.8, 132.7 (d,  $J = 10$  Hz), 126.8, 126.7 (d,  $J = 1.2$  Hz), 124.0, 115.6 (d,  $J = 21$  Hz), 112.1 (d,  $J = 25$  Hz).  $^{19}\text{F}$  NMR (377 MHz,  $\text{CDCl}_3$ )  $\delta$  -105.78. IR (KBr)  $\nu_{\text{max}}/\text{cm}^{-1}$  2920 (C–H), 1643 (C=O); HRMS (ESI):  $m/z$  ( $\text{M} + \text{H}^+$ ) calculated for  $\text{C}_{11}\text{H}_6\text{FOS}_2$  236.9839; found 236.9828.

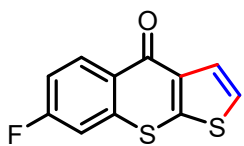

**2-(2-hydroxyethyl)-4*H*-thieno[2,3-*b*]thiochromen-4-one (7a).** A brown solid (35 mg, yield 74%), mp 142 °C,  $^1\text{H}$  NMR (400 MHz,  $\text{CDCl}_3$ )  $\delta$  8.66 – 8.64 (m, 1H), 7.60 (d,  $J = 5.9$  Hz, 3H), 7.53 (ddd,  $J = 8.2, 5.7, 2.6$  Hz, 1H), 3.95 (t,  $J = 6.1$  Hz, 2H), 3.13 (t,  $J = 6.4$  Hz, 2H).  $^{13}\text{C}$  NMR (125 MHz,  $\text{CDCl}_3$ )  $\delta$  175.5, 143.9, 140.1, 136.7, 134.8, 131.5, 129.9, 129.7, 126.9, 126.2, 124.3, 62.9, 33.4. IR (KBr)  $\nu_{\text{max}}/\text{cm}^{-1}$  3417 (O–H), 2925 (C–H), 1622 (C=O); HRMS (ESI):  $m/z$  ( $\text{M} + \text{H}^+$ ) calculated for  $\text{C}_{13}\text{H}_{11}\text{O}_2\text{S}_2$  263.0195; found 263.0187.

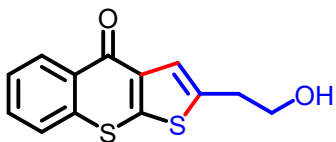

**5-chloro-2-(2-hydroxyethyl)-4*H*-thieno[2,3-*b*]thiochromen-4-one (7b).** A brown solid (46 mg, yield 77%), mp 155 °C,  $^1\text{H}$  NMR (400 MHz,  $\text{CDCl}_3$ )  $\delta$  7.52 (d,  $J = 7.0$  Hz, 2H), 7.49 (d,  $J = 1.3$  Hz, 1H), 7.45 – 7.41 (m, 1H), 3.93 (t,  $J = 6.1$  Hz, 2H), 3.11 (t,  $J = 5.8$  Hz, 2H), 1.78 (s, 1H).  $^{13}\text{C}$  NMR (125 MHz,  $\text{CDCl}_3$ )  $\delta$  175.1, 140.8, 140.4, 139.8, 137.3, 136.3, 131.1, 130.8, 126.7, 125.4, 124.8, 62.8, 33.4. IR (KBr)  $\nu_{\text{max}}/\text{cm}^{-1}$  3428 (O–H), 2925 (C–H), 1622 (C=O); HRMS (ESI):  $m/z$  ( $\text{M} + \text{H}^+$ ) calculated for  $\text{C}_{13}\text{H}_{10}\text{ClO}_2\text{S}_2$  296.9805; found 296.9811.

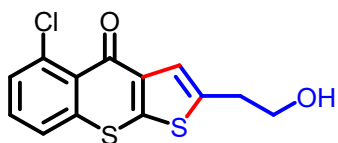

**6-chloro-2-(2-hydroxyethyl)-4*H*-thieno[2,3-*b*]thiochromen-4-one (7c).** A yellow solid (46 mg, yield 78%), mp 195 °C,  $^1\text{H}$  NMR (500 MHz,  $\text{CDCl}_3$ )  $\delta$  8.62 – 8.62 (m, 1H), 7.59 (s, 1H), 7.57 – 7.53 (m, 2H), 3.95 (t,  $J = 6.0$  Hz, 2H), 3.13 (t,  $J = 6.1$  Hz, 2H), 1.82 (s, 1H).  $^{13}\text{C}$  NMR (125 MHz,  $\text{CDCl}_3$ )  $\delta$  174.3, 143.8, 140.7, 134.8, 134.6, 133.4, 131.8, 131.2, 129.2, 127.5, 124.3, 62.8, 33.4. IR (KBr)  $\nu_{\text{max}}/\text{cm}^{-1}$  3402 (O–H), 2921 (C–H), 1624 (C=O); HRMS (ESI):  $m/z$  ( $\text{M} + \text{H}^+$ ) calculated for  $\text{C}_{13}\text{H}_{10}\text{ClO}_2\text{S}_2$  296.9805; found 296.9796.

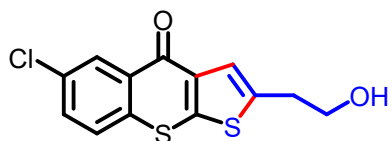

**7-chloro-2-(2-hydroxyethyl)-4*H*-thieno[2,3-*b*]thiochromen-4-one (7d).** A yellow solid (45 mg, yield 75%), mp 190 °C,  $^1\text{H}$  NMR (500 MHz,  $\text{CDCl}_3$ )  $\delta$  8.57 (d,  $J = 8.7$  Hz, 1H), 7.58 (d,  $J = 5.9$  Hz, 2H), 7.47 (d,  $J = 9.1$  Hz, 1H), 3.95 (t,  $J = 6.1$  Hz, 2H),

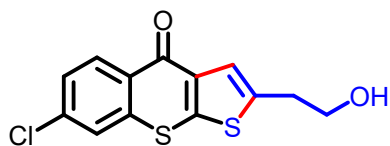

3.13 (t,  $J = 5.9$  Hz, 2H), 1.85 (s, 1H).  $^{13}\text{C}$  NMR (125 MHz,  $\text{CDCl}_3$ )  $\delta$  174.7, 143.2, 140.7, 138.2, 138.0, 134.8, 131.2, 128.4, 127.6, 125.4, 124.3, 62.8, 33.4. IR (KBr)  $\nu_{\text{max}}/\text{cm}^{-1}$  3418 (O–H), 2921 (C–H), 1623 (C=O); HRMS (ESI):  $m/z$  ( $M + H^+$ ) calculated for  $\text{C}_{13}\text{H}_{10}\text{ClO}_2\text{S}_2$  296.9805; found 296.9794.

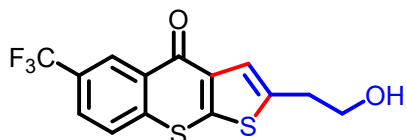

**2-(2-hydroxyethyl)-6-(trifluoromethyl)-4H-thieno[2,3-*b*]thiochromen-4-one (7e).** A light yellow solid (51 mg, yield 77%), mp 144 °C,  $^1\text{H}$  NMR (400 MHz,  $\text{CDCl}_3$ )  $\delta$  8.92 (s, 1H), 7.81 (dd,  $J = 8.5$ , 1.8 Hz, 1H), 7.71 (d,  $J = 8.5$  Hz, 1H), 7.61 (s, 1H), 3.96 (t,  $J = 5.9$  Hz, 2H), 3.15 (t,  $J = 6.3$  Hz, 2H), 1.88 (s, 1H),  $^{13}\text{C}$  NMR (125 MHz,  $\text{CDCl}_3$ )  $\delta$  174.4, 143.3, 141.2, 140.3, 134.8, 130.1, 129.4 (q,  $J = 33.5$  Hz), 127.4, (q,  $J = 3.4$  Hz), 127.1 (q,  $J = 4.2$  Hz), 127.1, 124.3, 123.7 (q,  $J = 272.4$  Hz), 62.8, 33.4.  $^{19}\text{F}$  NMR (377 MHz,  $\text{CDCl}_3$ )  $\delta$  -62.76. IR (KBr)  $\nu_{\text{max}}/\text{cm}^{-1}$  3418 (O–H), 2922 (C–H), 1623 (C=O); HRMS (ESI):  $m/z$  ( $M + H^+$ ) calculated for  $\text{C}_{14}\text{H}_{10}\text{F}_3\text{O}_2\text{S}_2$  331.0069; found 331.0069.

**7-fluoro-2-(2-hydroxyethyl)-4H-thieno[2,3-*b*]thiochromen-4-one (7f).** A white solid (44 mg, yield 78%), mp 160 °C,  $^1\text{H}$  NMR (500 MHz,  $\text{CDCl}_3$ )  $\delta$  8.65 (dd,  $J = 8.9$ , 6.0 Hz, 1H), 7.57 (s, 1H), 7.29 – 7.26 (m, 1H), 7.23 (td,  $J = 9.0$ , 2.3 Hz, 1H), 3.95 (s, 2H), 3.13 (t,  $J = 5.9$  Hz, 2H), 1.97 (s, 1H).  $^{13}\text{C}$  NMR (125 MHz,  $\text{CDCl}_3$ )  $\delta$  174.6, 164.0, (d,  $J = 256.1$  Hz), 143.1, 140.6, 138.8 (d,  $J = 10$  Hz), 134.8, 132.6 (d,  $J = 9.8$  Hz), 126.6 (d,  $J = 2.3$  Hz), 124.3, 115.5 (d,  $J = 22.3$  Hz), 112.1, (d,  $J = 24.9$  Hz),, 62.8, 33.4.  $^{19}\text{F}$  NMR (377 MHz,  $\text{CDCl}_3$ )  $\delta$  -106.03. IR (KBr)  $\nu_{\text{max}}/\text{cm}^{-1}$  3421 (O–H), 2922 (C–H), 1625 (C=O); HRMS (ESI):  $m/z$  ( $M + H^+$ ) calculated for  $\text{C}_{13}\text{H}_{10}\text{FO}_2\text{S}_2$  281.0101; found 281.0096.

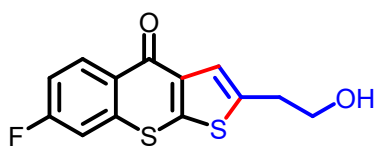

**2-(6-chloro-4-oxo-4H-thieno[2,3-*b*]thiochromen-2-yl)ethyl acetate (8a).** A light yellow solid (53 mg, yield 78%), mp 160 °C  $^1\text{H}$  NMR (400 MHz,  $\text{CDCl}_3$ ) 8.62 (d,  $J = 1.6$  Hz, 1H), 7.60 – 7.54 (m, 3H), 4.34 (t,  $J = 6.3$  Hz, 2H), 3.21 (t,  $J = 6.3$  Hz, 2H), 2.09 (s, 3H),  $^{13}\text{C}$  NMR (125 MHz,  $\text{CDCl}_3$ )  $\delta$  174.3, 170.9, 143.8, 139.6, 134.7, 134.6, 133.5, 131.8, 131.2, 129.2, 127.6, 124.6, 63.8, 29.6, 21.1. IR (KBr)  $\nu_{\text{max}}/\text{cm}^{-1}$  2924 (C–H), 1744 (O–CO–CH<sub>3</sub>), 1631 (C=O); HRMS (ESI):  $m/z$  ( $M + H^+$ ) calculated for  $\text{C}_{15}\text{H}_{12}\text{ClO}_3\text{S}_2$  338.9911; found 338.9878.

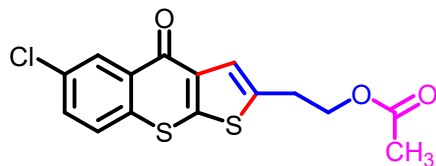

**3-(4-oxo-4H-thieno[2,3-*b*]thiochromen-2-yl)propyl acetate (10a).** A brown solid (45 mg, yield 71%), mp 105 °C,  $^1\text{H}$  NMR (400 MHz,  $\text{CDCl}_3$ )  $\delta$  8.66 (d,  $J = 8.0$  Hz, 1H), 7.62 – 7.61 (m, 2H), 7.56 – 7.52 (m, 2H), 4.16 (t,  $J = 6.3$  Hz, 2H), 2.97 (t,  $J = 7.3$  Hz, 2H), 2.11 – 2.04 (m, 5H).  $^{13}\text{C}$  NMR (125 MHz,  $\text{CDCl}_3$ )  $\delta$  175.6, 171.2, 143.2, 142.7, 136.7, 135.0, 131.4, 130.0, 129.7, 126.9, 126.2, 123.5, 63.2, 30.0, 26.6, 21.0. IR (KBr)  $\nu_{\text{max}}/\text{cm}^{-1}$  2925 (C–H), 1745 (O–CO–CH<sub>3</sub>), 1642 (C=O); HRMS (ESI):  $m/z$  ( $M + H^+$ ) calculated for  $\text{C}_{16}\text{H}_{15}\text{O}_3\text{S}_2$  319.0457; found 319.0439.

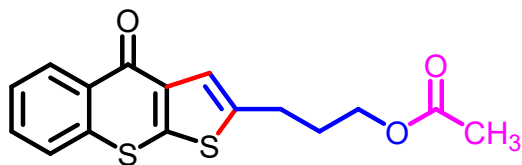

**3-(6-chloro-4-oxo-4H-thieno[2,3-b]thiochromen-2-yl)propyl acetate (10b).** A brown solid ( 51 mg, 72%), mp 135 °C, <sup>1</sup>H NMR (500 MHz, CDCl<sub>3</sub>) δ 8.59 (d, *J* = 8.7 Hz, 1H), 7.61 (d, *J* = 2.0 Hz, 1H), 7.54 (s, 1H), 7.48 (dd, *J* = 8.7, 2.0 Hz, 1H), 4.15 (t, *J* = 6.3 Hz, 2H), 2.97 (t, *J* = 7.6 Hz, 2H), 2.10 – 2.04 (m, 5H). <sup>13</sup>C NMR (125 MHz, CDCl<sub>3</sub>) δ 174.7, 171.1, 143.2, 142.5, 138.2, 138.0, 135.0, 131.2, 128.4, 127.6, 125.5, 123.5, 63.1, 30.0, 26.6, 21.0. IR (KBr)  $\nu_{\max}/\text{cm}^{-1}$  2924 (C–H), 1744 (O–CO–CH<sub>3</sub>) 1639 (C=O); HRMS (ESI): *m/z* (M + H<sup>+</sup>) calculated for C<sub>16</sub>H<sub>14</sub>ClO<sub>3</sub>S<sub>2</sub> 353.0067; found 353.0061.

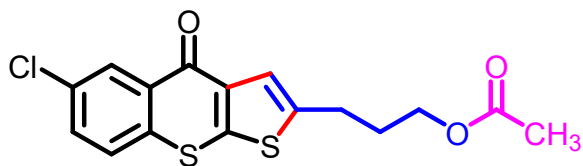

**3-(7-fluoro-4-oxo-4H-thieno[2,3-b]thiochromen-2-yl)propyl acetate (10c).** A light brown solid (47 mg, yield 70%), mp 112 °C, <sup>1</sup>H NMR (500 MHz, CDCl<sub>3</sub>) δ 8.68 (dd, *J* = 9.0, 5.9 Hz, 1H), 7.54 (s, 1H), 7.30 (dd, *J* = 8.6, 2.4 Hz, 1H), 7.23 (dd, *J* = 8.1, 2.4 Hz, 1H), 4.15 (t, *J* = 6.3 Hz, 2H), 2.97 (t, *J* = 7.6 Hz, 2H), 2.10 – 2.05 (m, 5H). <sup>13</sup>C NMR (125 MHz, CDCl<sub>3</sub>) δ 174.6, 171.1, 164.0 (d, *J* = 255.9 Hz), 143.1, 142.4, 138.8 (d, *J* = 9.9 Hz) 135.0, 132.6 (d, *J* = 9.7 Hz), 126.7, 123.5, 115.5 (d, *J* = 22.2 Hz), 112.1 (d, *J* = 25.2 Hz), 63.1, 30.0, 26.6, 21.0. <sup>19</sup>F NMR (471 MHz, CDCl<sub>3</sub>) δ -106.32. IR (KBr)  $\nu_{\max}/\text{cm}^{-1}$  2935 (C–H), 1744 (O–CO–CH<sub>3</sub>), 1638 (C=O); HRMS (ESI): *m/z* (M + H<sup>+</sup>) calculated for C<sub>16</sub>H<sub>14</sub>FO<sub>3</sub>S<sub>2</sub> 337.0363; found 337.0351.

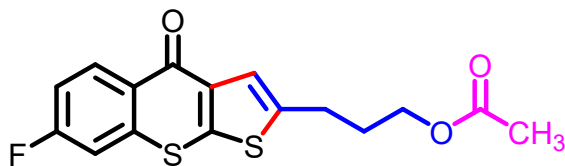

**4H-thieno[2,3-b]chromen-4-one (11a).** A yellow brown solid (30 mg, yield 74%), mp 121 °C <sup>1</sup>H NMR (500 MHz, CDCl<sub>3</sub>) δ 8.38 (d, *J* = 7.9 Hz, 1H), 7.71 (t, *J* = 8.1 Hz, 1H), 7.54 (d, *J* = 8.4 Hz, 1H), 7.45 (t, *J* = 7.0 Hz, 2H), 6.92 (d, *J* = 5.9 Hz, 1H), <sup>13</sup>C NMR (125 MHz, CDCl<sub>3</sub>) δ 173.0, 168.0, 156.8, 133.5, 126.7, 124.8, 123.4, 122.5, 121.3, 117.5, 115.2. IR (KBr)  $\nu_{\max}/\text{cm}^{-1}$  2920 (C–H), 1638 (C=O); HRMS (ESI): *m/z* (M + H<sup>+</sup>) calculated for C<sub>11</sub>H<sub>7</sub>O<sub>2</sub>S 203.0161; found 203.0162.

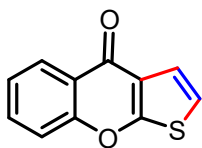

**6-fluoro-4H-thieno[2,3-b]chromen-4-one (11b).** A brown solid ( 31 mg, yield 71%), mp 129 °C, <sup>1</sup>H NMR (600 MHz, CDCl<sub>3</sub>) δ 8.01 (dd, *J* = 8.2, 2.8 Hz, 1H), 7.55 (dd, *J* = 9.1, 4.0 Hz, 1H), 7.45-7.41 (m, 2H), 6.94 (d, *J* = 5.9 Hz, 1H), <sup>13</sup>C NMR (150 MHz, CDCl<sub>3</sub>) δ 172.4, 168.5, 159.5, (d, *J* = 246.6 Hz) 153.2, 124.0 (d, *J* = 7.1 Hz), 123.0, 121.8 (d, *J* = 25.5 Hz), 119.7 (d, *J* = 7.9 Hz), 115.9, 111.9 (d, *J* = 23.8 Hz). <sup>19</sup>F NMR (377 MHz, CDCl<sub>3</sub>) δ -114.54. IR (KBr)  $\nu_{\max}/\text{cm}^{-1}$  2924 (C–H), 1656 (C=O); HRMS (ESI): *m/z* (M + H<sup>+</sup>) calculated for C<sub>11</sub>H<sub>6</sub>FO<sub>2</sub>S 221.0067; found 221.0059.

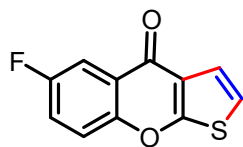

**6-chloro-4H-thieno[2,3-b]chromen-4-one (11c).** A brown solid ( 35 mg, yield 73%), mp 137 °C, <sup>1</sup>H NMR (400 MHz, CDCl<sub>3</sub>) δ 8.33 (d, *J* = 2.6 Hz, 1H), 7.65 (dd, *J* = 8.9, 2.6 Hz, 1H), 7.50 (d, *J* = 8.9 Hz, 1H), 7.45 (d, *J* = 6.0 Hz, 1H), 6.94 (d, *J* = 6.0 Hz, 1H). <sup>13</sup>C

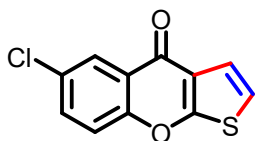

NMR (125 MHz, CDCl<sub>3</sub>)  $\delta$  172.0, 168.4, 155.3, 133.8, 131.0, 126.4, 123.8, 123.5, 121.5, 119.4, 116.0. IR (KBr)  $\nu_{\max}/\text{cm}^{-1}$  2928 (C–H), 1656 (C=O); HRMS (ESI):  $m/z$  (M + H<sup>+</sup>) calculated for C<sub>11</sub>H<sub>5</sub>ClO<sub>2</sub>S 236.9772; found 236.9752.

**6-methyl-4H-thieno[2,3-b]chromen-4-one (11d).** A yellow brown solid (30 mg, yield 69%), mp 130 °C, <sup>1</sup>H NMR (500 MHz, CDCl<sub>3</sub>)  $\delta$  8.15 (s, 1H), 7.51 (d,  $J$  = 8.5 Hz, 1H), 7.44 (t,  $J$  = 7.7 Hz, 2H), 6.90 (d,  $J$  = 5.9 Hz, 1H), 2.49 (s, 3H). <sup>13</sup>C NMR (125 MHz, CDCl<sub>3</sub>)  $\delta$  173.4, 168.3, 155.4, 135.0, 134.9, 126.3, 123.5, 122.4, 121.6, 117.4, 115.3, 21.0. IR (KBr)  $\nu_{\max}/\text{cm}^{-1}$  2923 (C–H), 1653 (C=O); HRMS (ESI):  $m/z$  (M + H<sup>+</sup>) calculated for C<sub>12</sub>H<sub>9</sub>O<sub>2</sub>S 217.0318; found 217.0315.

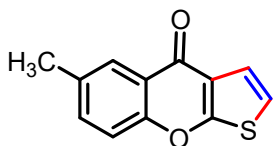

**6-Methoxy-4H-thieno[2,3-b]chromen-4-one (11e).** A yellow brown solid (33 mg, yield 69%), mp 117 °C, <sup>1</sup>H NMR (500 MHz, CDCl<sub>3</sub>)  $\delta$  7.73 (s, 1H), 7.46 (t,  $J$  = 8.6 Hz, 2H), 7.29 (d,  $J$  = 9.1 Hz, 1H), 6.90 (d,  $J$  = 5.7 Hz, 1H), 3.93 (s, 3H). <sup>13</sup>C NMR (125 MHz, CDCl<sub>3</sub>)  $\delta$  173.1, 168.2, 156.8, 151.9, 123.5, 123.3, 123.1, 121.5, 119.0, 115.4, 106.2, 56.1. IR (KBr)  $\nu_{\max}/\text{cm}^{-1}$  2923 (C–H), 1649 (C=O); HRMS (ESI):  $m/z$  (M + H<sup>+</sup>) calculated for C<sub>12</sub>H<sub>9</sub>O<sub>3</sub>S 233.0267; found 233.0267.

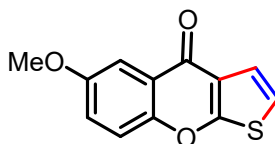

**2-(2-hydroxyethyl)-4H-thieno[2,3-b]chromen-4-one (12a).** A yellowish brown solid, (37 mg, 74%), mp 134 °C; <sup>1</sup>H NMR (400 MHz, CDCl<sub>3</sub>)  $\delta$  8.34 (dd,  $J$  = 8.0, 1.8 Hz, 1H), 7.68 (ddd,  $J$  = 8.7, 7.1, 1.8 Hz, 1H), 7.50 (d,  $J$  = 8.4 Hz, 1H), 7.43 (ddd,  $J$  = 8.1, 7.1, 1.1 Hz, 1H), 7.20 (s, 1H), 3.94 (t,  $J$  = 6.0 Hz, 2H), 3.06 (t,  $J$  = 6.5 Hz, 2H), 1.86 (s, 1H). <sup>13</sup>C NMR (125 MHz, CDCl<sub>3</sub>)  $\delta$  172.8, 167.3, 156.9, 133.5, 131.7, 126.9, 124.9, 123.7, 122.9, 118.8, 117.7, 62.8, 33.7. IR (KBr)  $\nu_{\max}/\text{cm}^{-1}$  3416 (O–H), 1634 (C=O), 1462 (C–O); HRMS (ESI) calculated for C<sub>13</sub>H<sub>11</sub>O<sub>3</sub>S 247.0423 (M + H<sup>+</sup>); found 247.0422

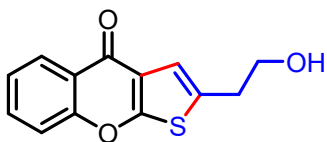

**6-chloro-2-(2-hydroxyethyl)-4H-thieno[2,3-b]chromen-4-one (12c).** A brown solid (43 mg, yield 77%), mp 149 °C <sup>1</sup>H NMR (500 MHz, CDCl<sub>3</sub>)  $\delta$  8.31 (s, 1H), 7.63 (d,  $J$  = 11.0 Hz, 1H), 7.48 (d,  $J$  = 8.9 Hz, 1H), 7.19 (s, 1H), 3.94 (t,  $J$  = 6.0 Hz, 2H), 3.07 (t,  $J$  = 6.0 Hz, 2H). <sup>13</sup>C NMR (125 MHz, CDCl<sub>3</sub>)  $\delta$  171.6, 167.4, 155.2, 133.6, 132.3, 130.9, 126.3, 124.0, 123.5, 119.4, 118.7, 62.8, 33.7. IR (KBr)  $\nu_{\max}/\text{cm}^{-1}$  3426 (O–H), 2925 (C–H), 1642 (C=O); HRMS (ESI):  $m/z$  (M + H<sup>+</sup>) calculated for C<sub>13</sub>H<sub>10</sub>ClO<sub>3</sub>S 281.0034; found 281.0028.

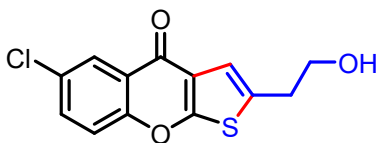

**2-(2-hydroxyethyl)-6-methyl-4H-thieno[2,3-b]chromen-4-one (12d).** A yellowish brown solid, (41 mg, yield 75%), mp 138.3 °C; <sup>1</sup>H NMR (500 MHz, CDCl<sub>3</sub>)  $\delta$  8.12 (s, 1H), 7.48 (d,  $J$  = 8.3 Hz, 1H), 7.39 (d,  $J$  = 8.2 Hz, 1H), 7.19 (s, 1H), 3.93 (t,  $J$  = 7.2 Hz,

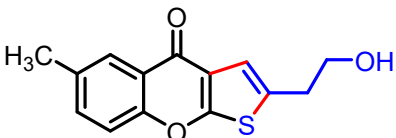

2H), 3.05 (t,  $J = 6.8$  Hz, 2H), 2.48 (s, 3H).  $^{13}\text{C}$  NMR (125 MHz,  $\text{CDCl}_3$ )  $\delta$  173.0, 167.3, 155.3, 134.9, 134.7, 131.4, 126.2, 123.6, 122.5, 118.8, 117.4, 62.8, 33.7, 21.0. IR (KBr)  $\nu_{\text{max}}/\text{cm}^{-1}$  3421 (O–H), 2921 (C–H), 1638 (C=O); HRMS (ESI):  $m/z$  ( $M + H^+$ ) calculated for  $\text{C}_{14}\text{H}_{13}\text{O}_3\text{S}$  261.0580; found 261.0581.

**2-(2-hydroxyethyl)-6-methoxy-4*H*-thieno[2,3-*b*]chromen-4-one (12e).** A brown solid, (41 mg, yield 75%), mp 135.2 °C,  $^1\text{H}$  NMR (400 MHz,  $\text{CDCl}_3$ )  $\delta$  7.68 (d,  $J = 3.0$  Hz, 1H), 7.41 (d,  $J = 9.1$  Hz, 1H), 7.24 (dd,  $J = 5.9, 3.1$  Hz, 1H), 7.17 (s, 1H), 3.94-3.90 (m, 2H), 3.04 (t,  $J = 5.9$  Hz, 2H).  $^{13}\text{C}$  NMR (125 MHz,  $\text{CDCl}_3$ )  $\delta$  172.7, 167.3, 156.7, 151.8, 131.6, 123.4, 123.3, 123.1, 119.0, 118.7, 106.1, 62.8, 56.1, 33.7. IR (KBr)  $\nu_{\text{max}}/\text{cm}^{-1}$  3411 (O–H), 2923 (C–H), 1642 (C=O); HRMS (ESI):  $m/z$  ( $M + H^+$ ) calculated for  $\text{C}_{14}\text{H}_{13}\text{O}_4\text{S}$  277.0529; found 277.0529.

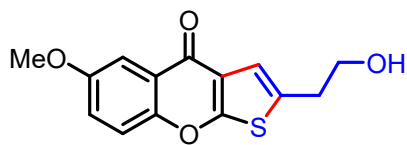

### S3: $^1\text{H}$ , $^{13}\text{C}$ NMR and HRMS data of each synthesised Compounds.

$^1\text{H}$  NMR (500 MHz,  $\text{CDCl}_3$ ) spectrum of Compound 4a

4a 1H

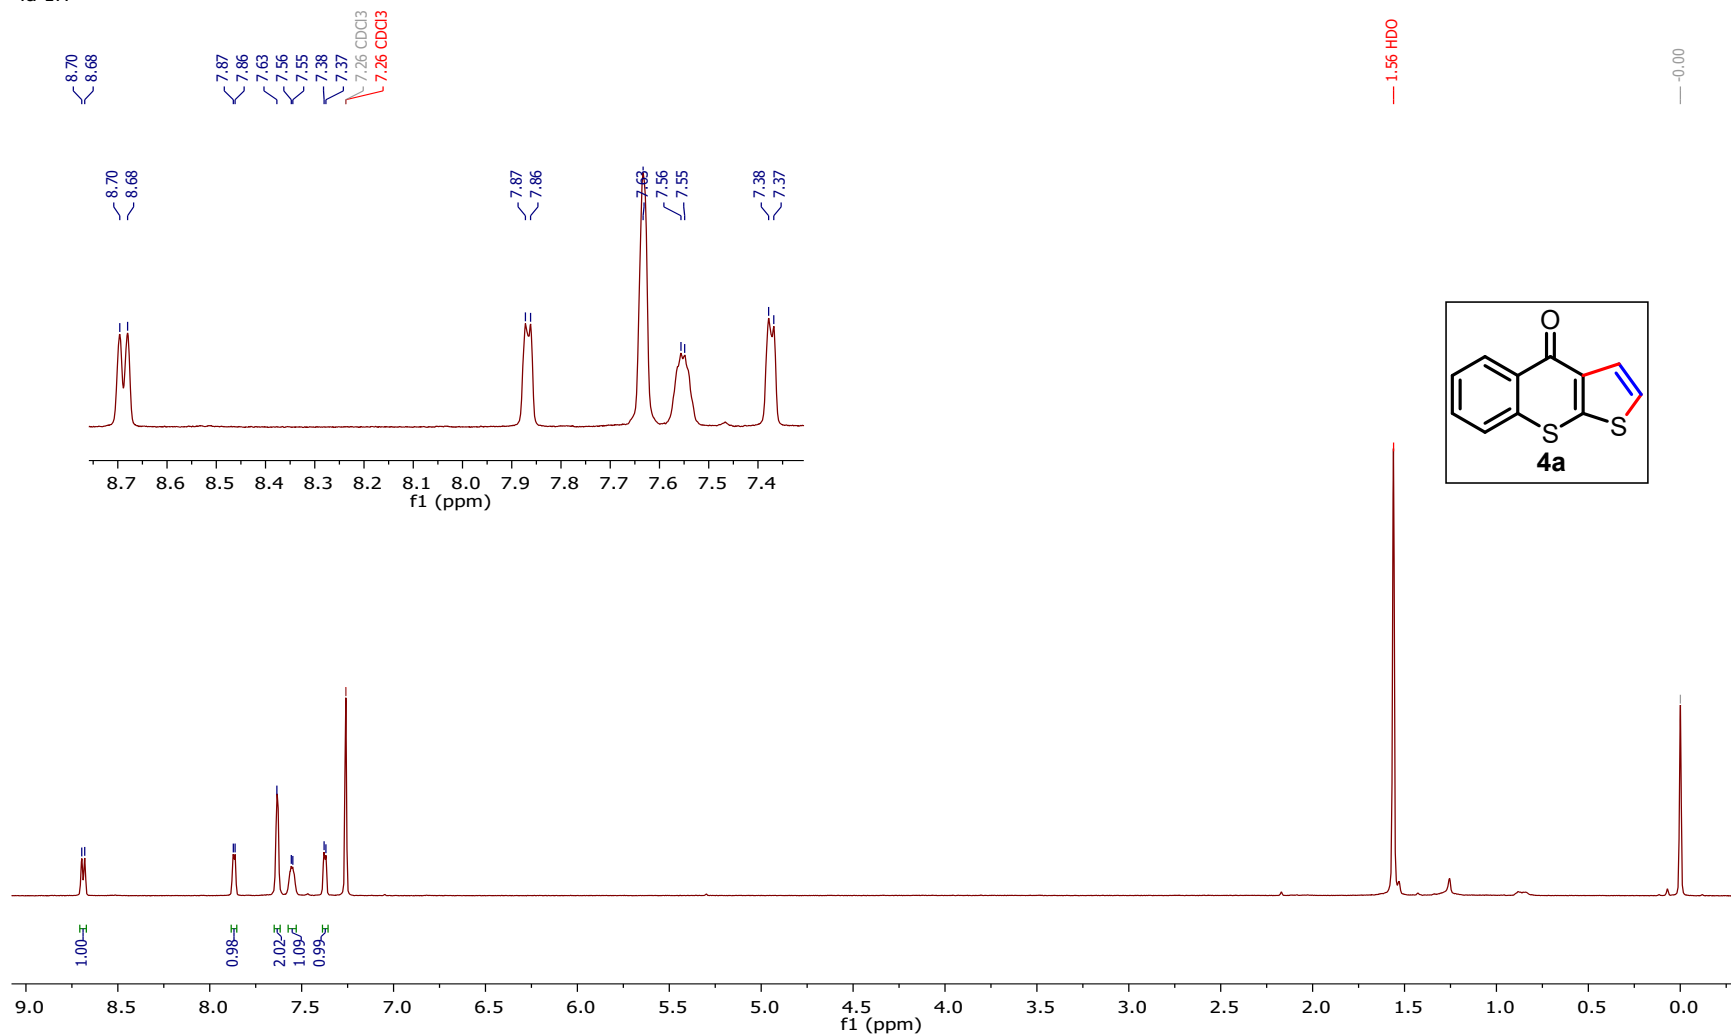

$^{13}\text{C} \{^1\text{H}\}$  NMR (125 MHz,  $\text{CDCl}_3$ ) spectrum of Compound 4a

4a 13C

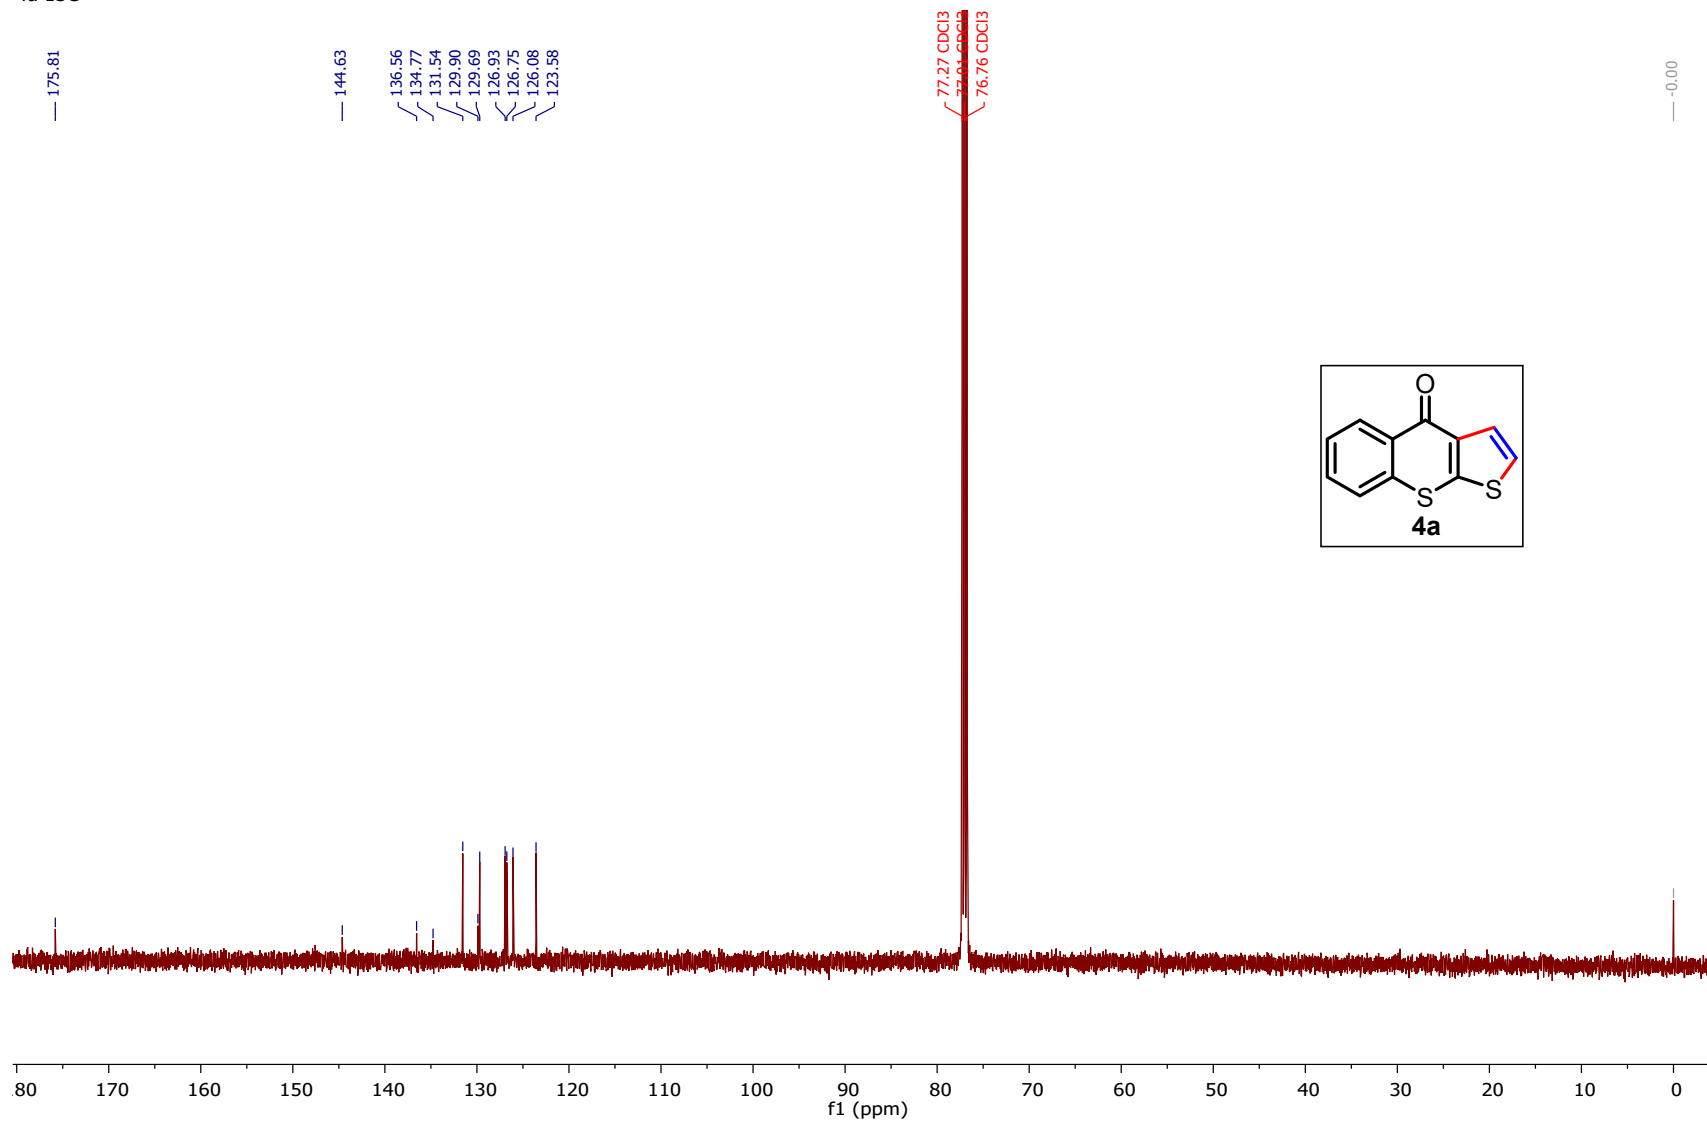

HRMS of compound 4a

|                    |                                |                               |         |                        |                                 |
|--------------------|--------------------------------|-------------------------------|---------|------------------------|---------------------------------|
| <b>Sample Name</b> | Sample12                       | <b>Position</b>               | P1-B1   | <b>Instrument Name</b> | QTOF                            |
| <b>User Name</b>   | SYSTEM (SYSTEM)                | <b>Inj Vol</b>                | 5       | <b>InjPosition</b>     |                                 |
| <b>Sample Type</b> | Sample                         | <b>IRM Calibration Status</b> | Success | <b>Data Filename</b>   | DK-47-A,d                       |
| <b>ACQ Method</b>  | DIRECT MASS_POSITIVE_01_1500.m | <b>Comment</b>                |         | <b>Acquired Time</b>   | 07-04-2025 15:01:31 (UTC+05:30) |

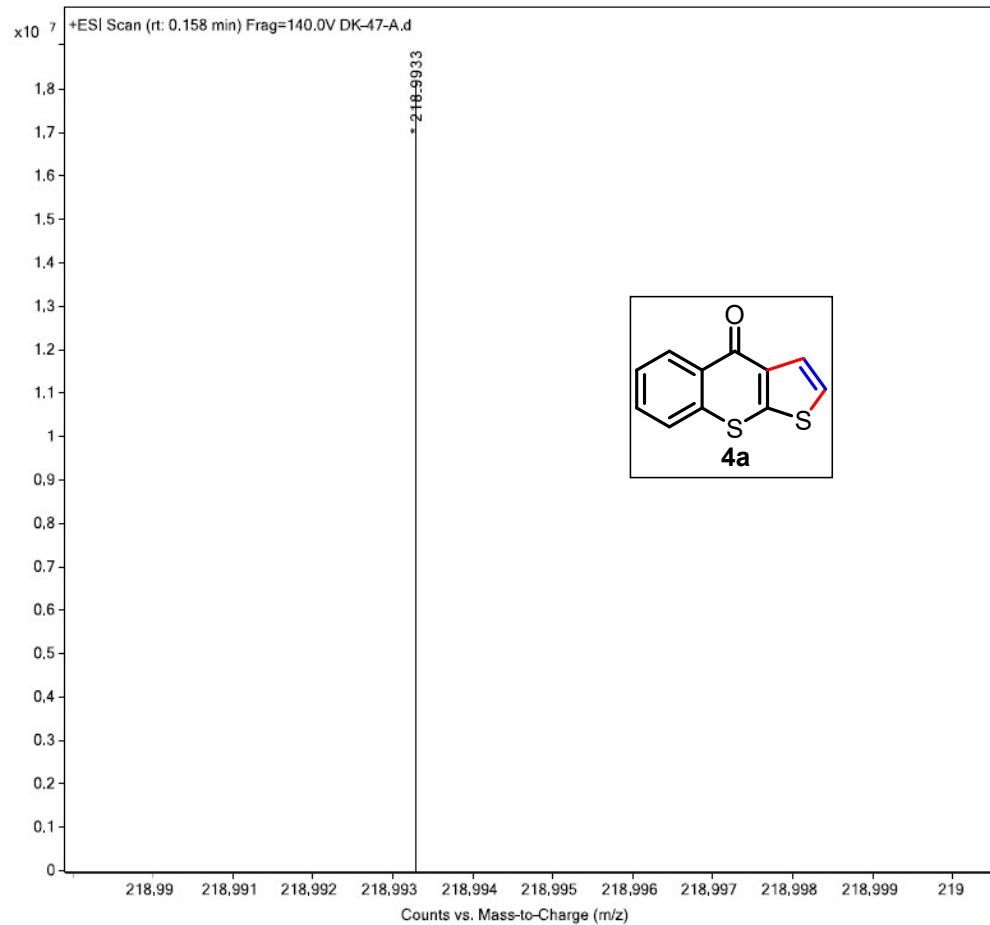

**<sup>1</sup>H NMR (500 MHz, CDCl<sub>3</sub>) spectrum of Compound 4b**

4b 1H

7.80  
7.79  
7.55  
7.54  
7.53  
7.47  
7.46  
7.44  
7.34  
7.34  
7.26 CDCl3

1.58 H2O

-0.00

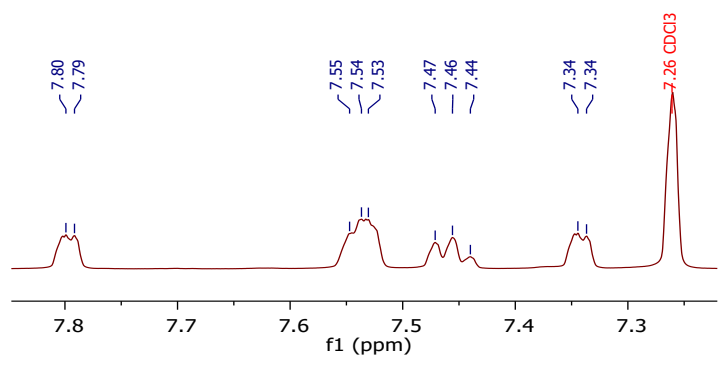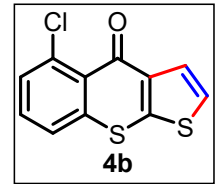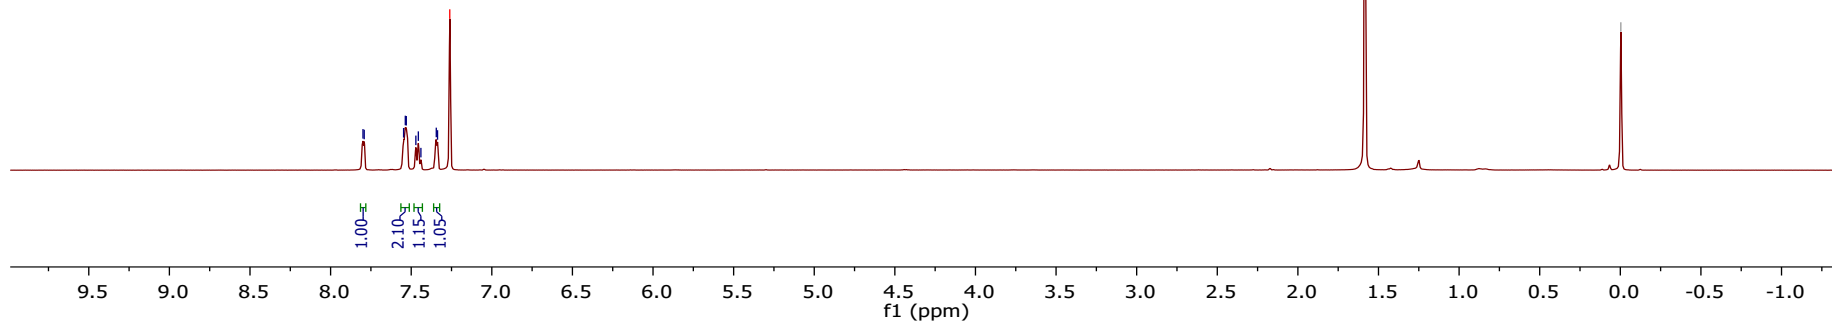

**$^{13}\text{C} \{^1\text{H}\}$  NMR (125 MHz,  $\text{CDCl}_3$ ) spectrum of Compound 4b**

4b 13C

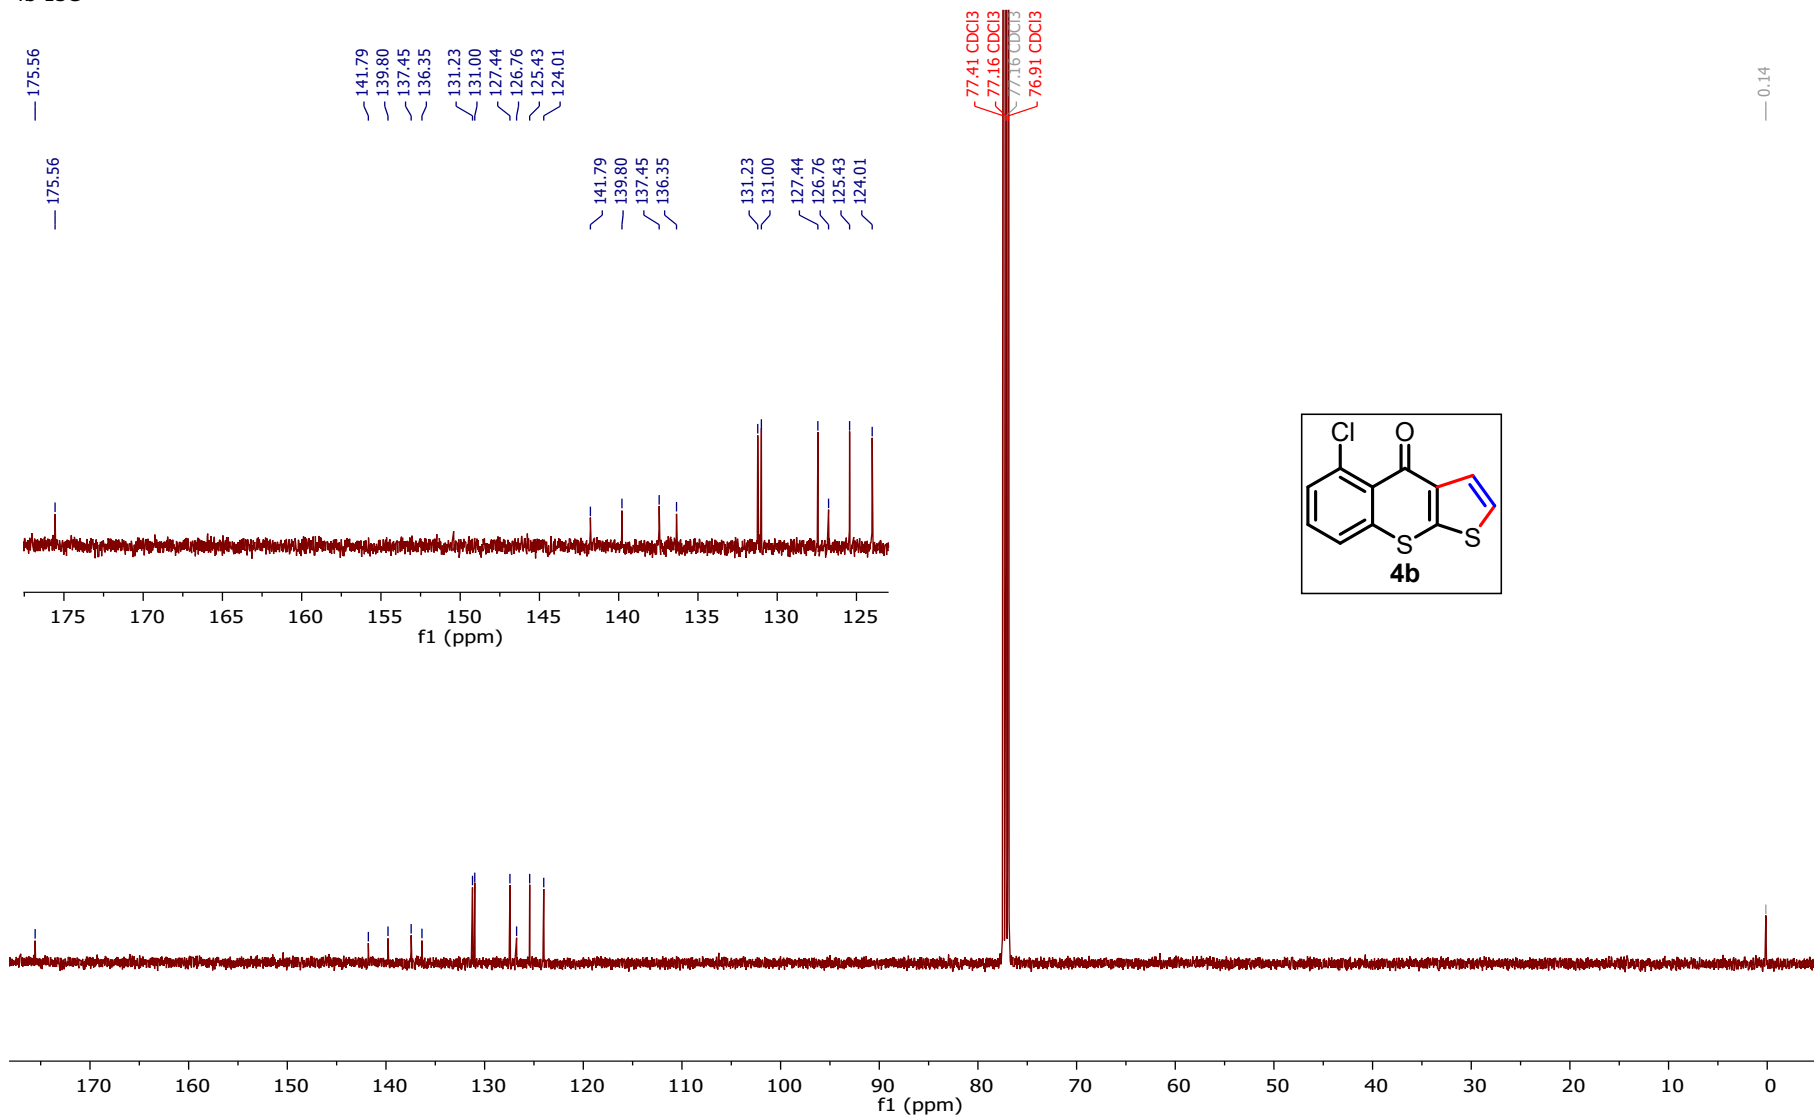

HRMS of compound 4b

|                    |                                |                               |         |                        |                                 |
|--------------------|--------------------------------|-------------------------------|---------|------------------------|---------------------------------|
| <b>Sample Name</b> | Sample2                        | <b>Position</b>               | P1-A2   | <b>Instrument Name</b> | QTOF                            |
| <b>User Name</b>   | SYSTEM (SYSTEM)                | <b>Inj Vol</b>                | 5       | <b>InjPosition</b>     |                                 |
| <b>Sample Type</b> | Sample                         | <b>IRM Calibration Status</b> | Success | <b>Data Filename</b>   | DK-DT-2,d                       |
| <b>ACQ Method</b>  | DIRECT MASS_POSITIVE_50_1500,m | <b>Comment</b>                |         | <b>Acquired Time</b>   | 28-07-2025 10:17:04 (UTC+05:30) |

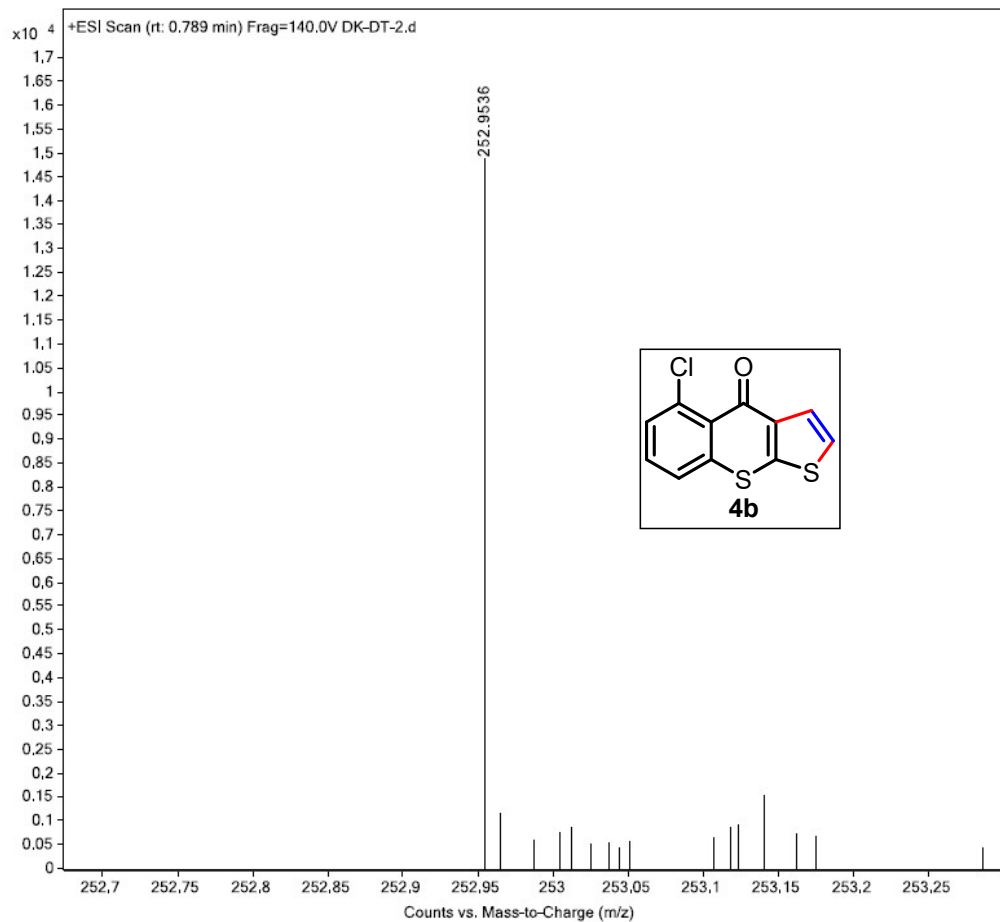

<sup>1</sup>H NMR (500 MHz, CDCl<sub>3</sub>) spectrum of Compound 4c

4c 1H

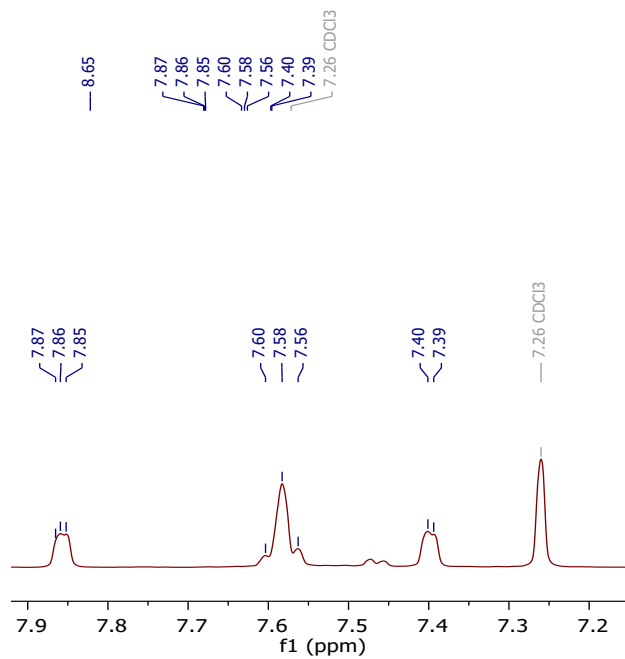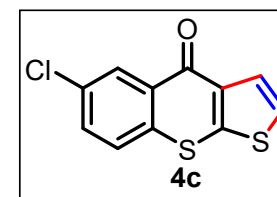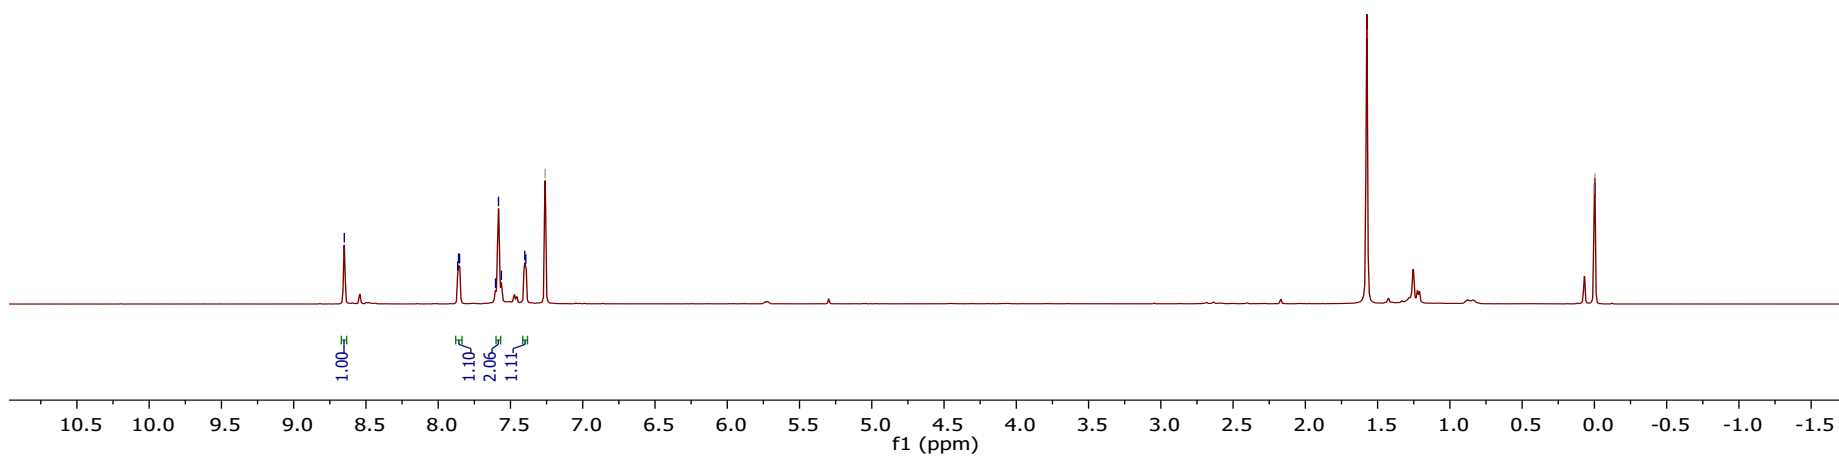

<sup>13</sup>C {<sup>1</sup>H} NMR (125 MHz, CDCl<sub>3</sub>) spectrum of Compound 4c

4c 13C

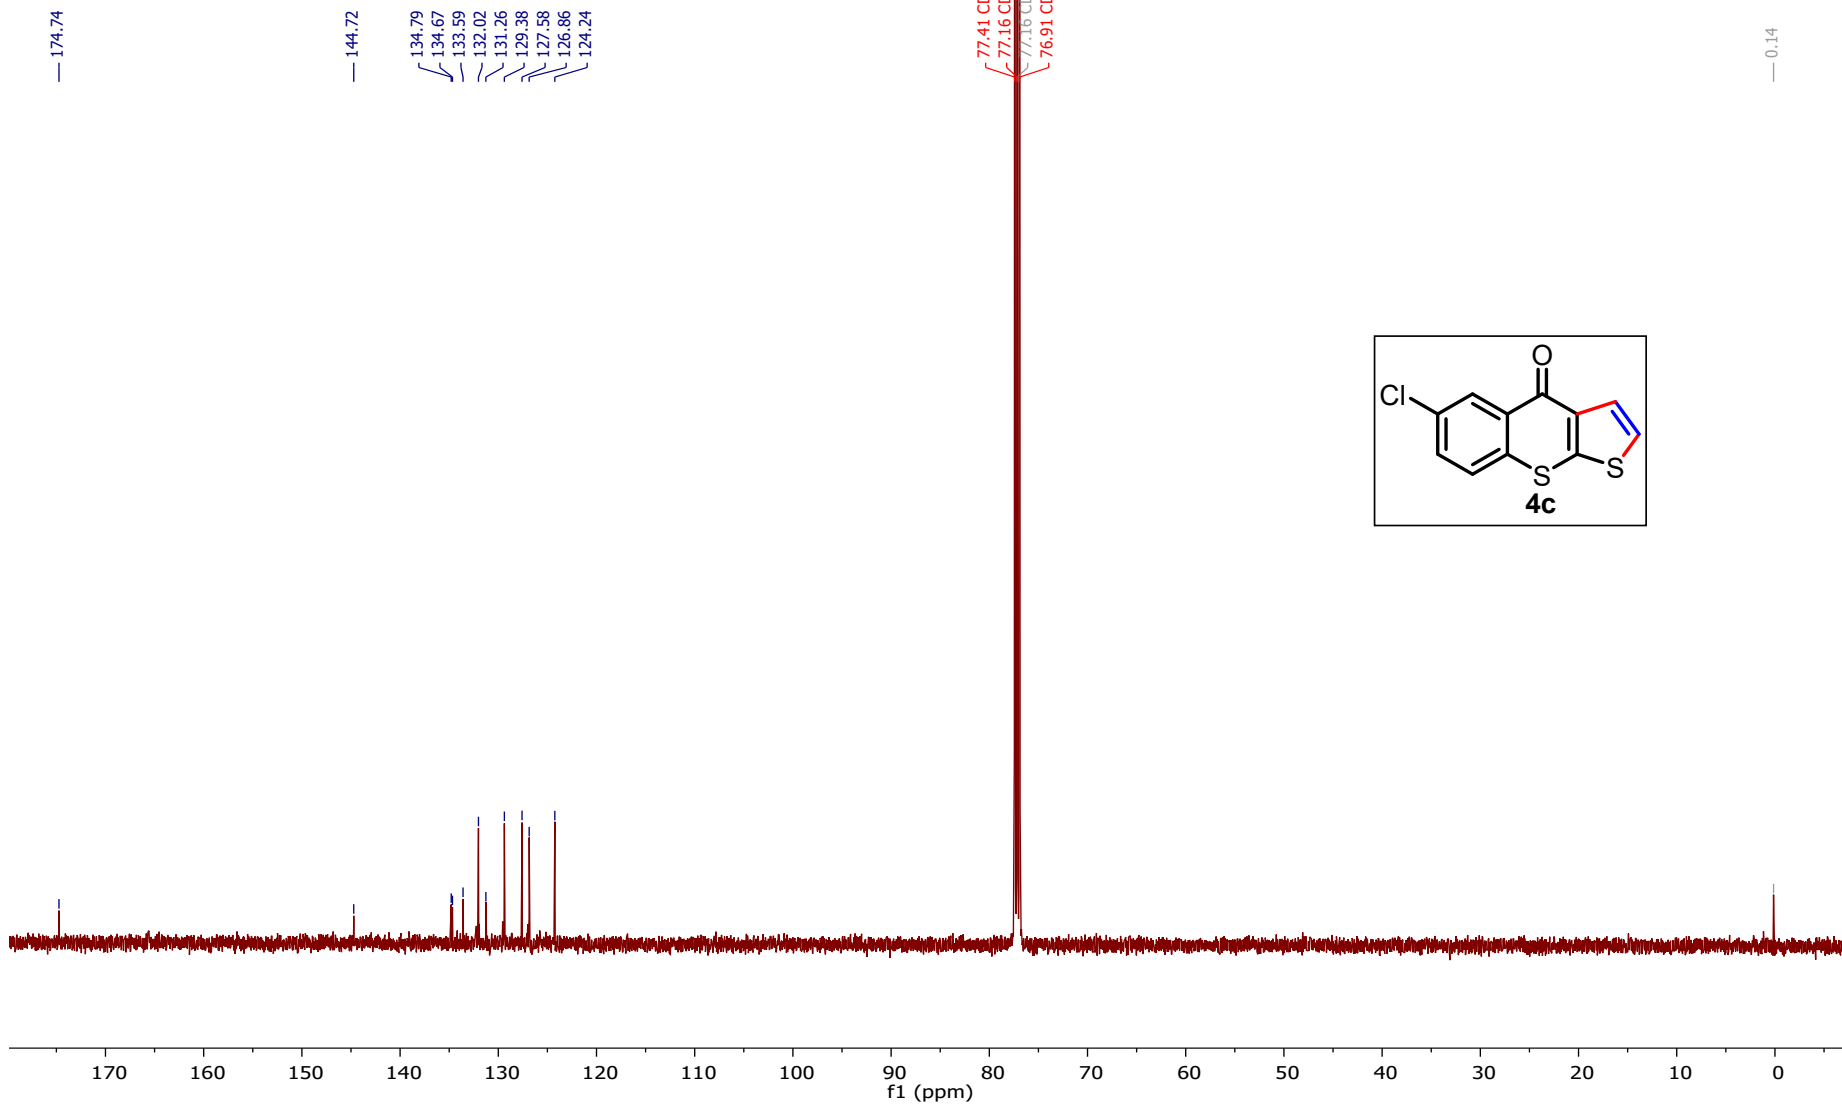

HRMS of compound 4c

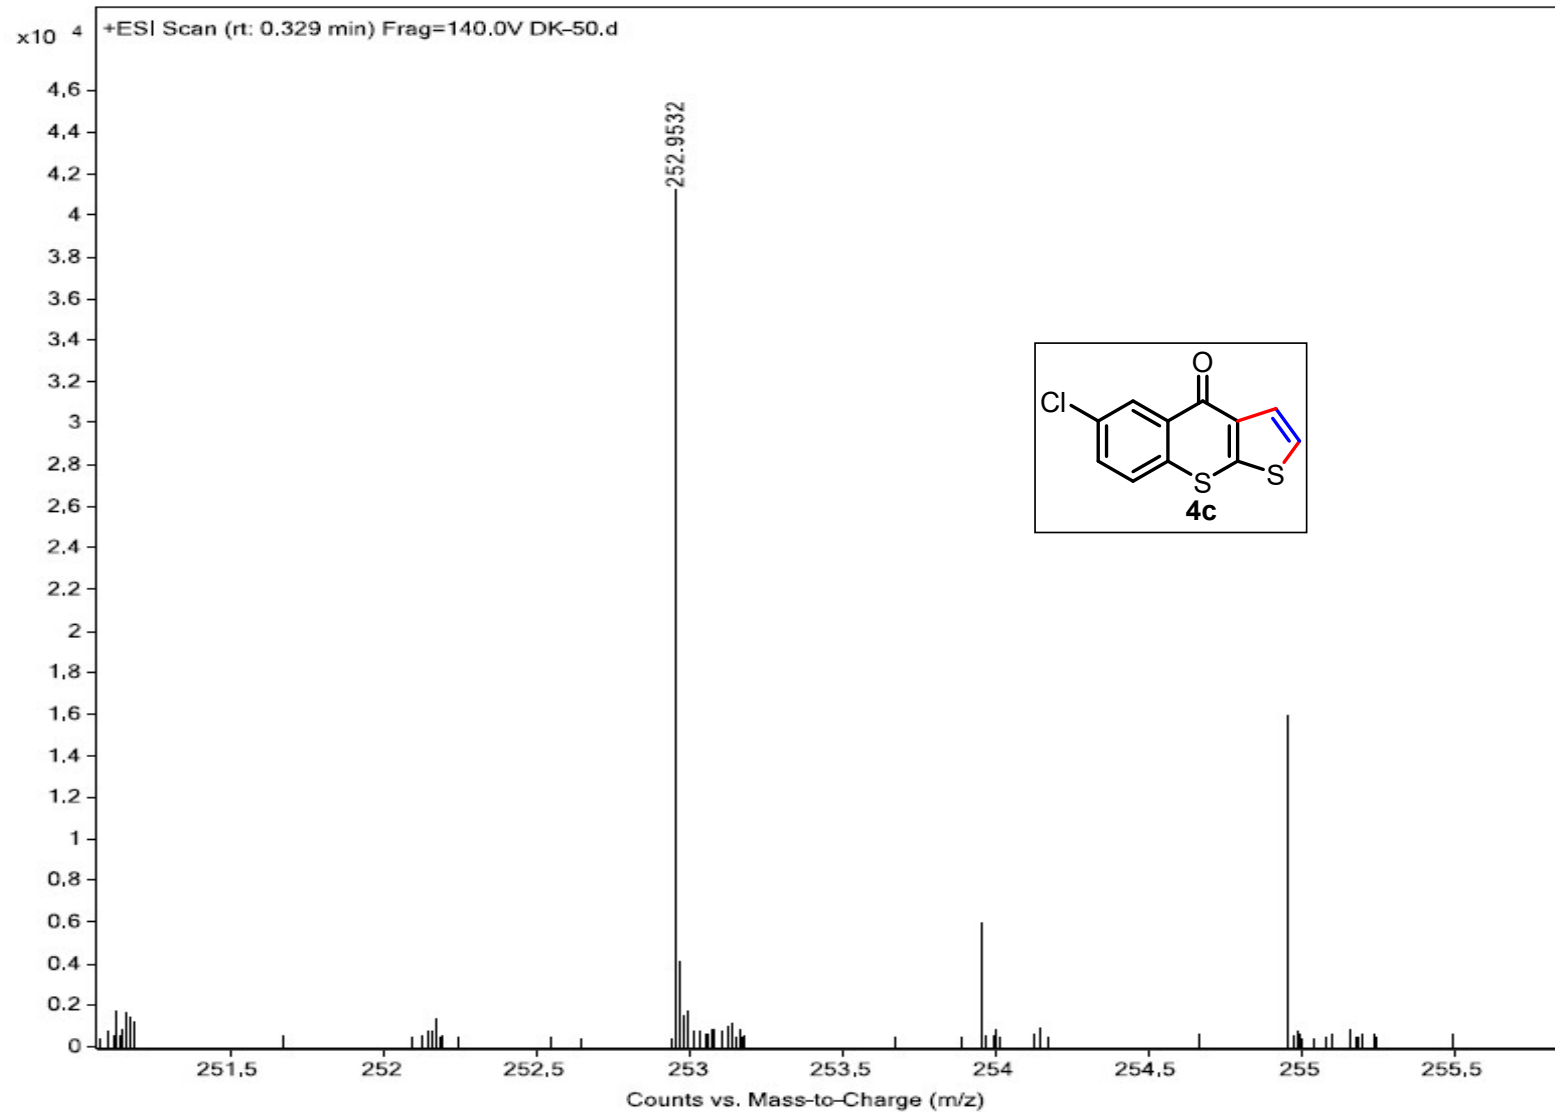

<sup>1</sup>H NMR (500 MHz, CDCl<sub>3</sub>) spectrum of Compound 4d

4d 1H

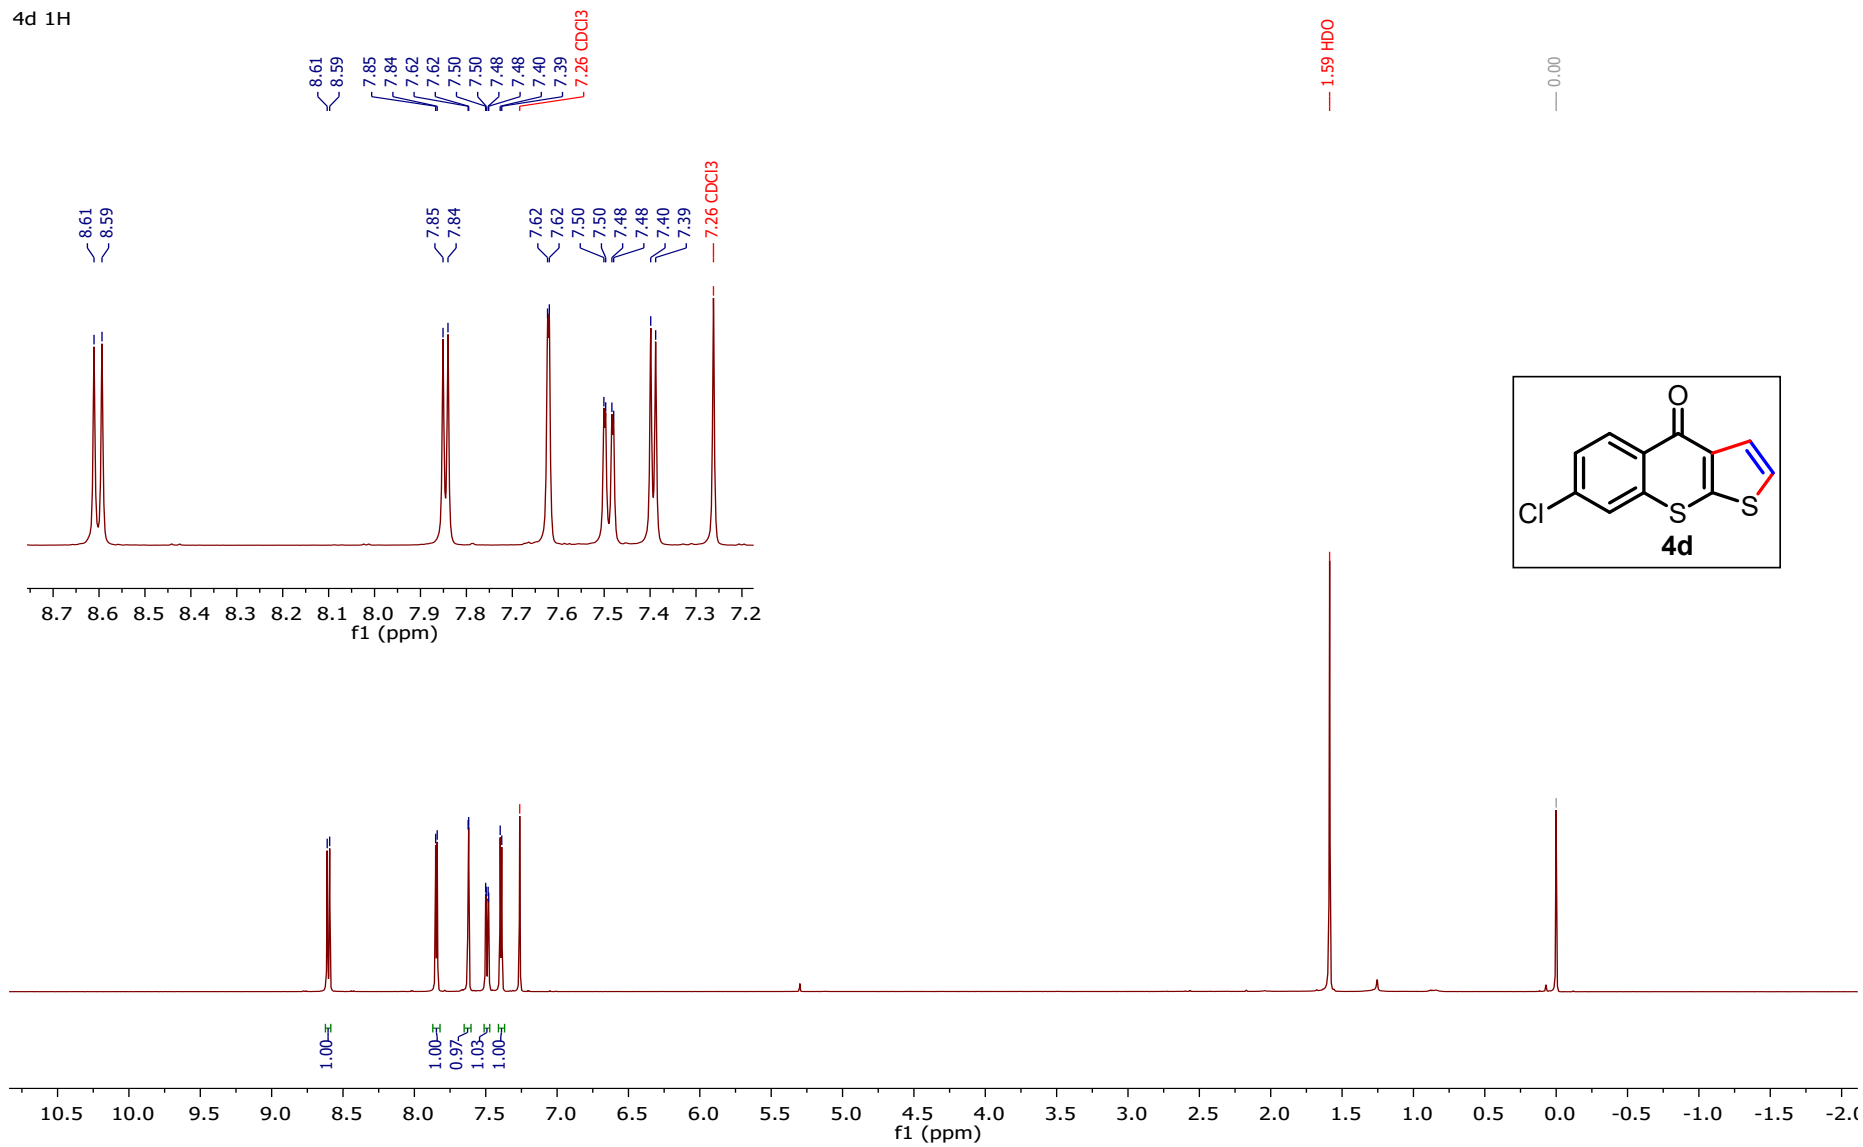

4d <sup>13</sup>C

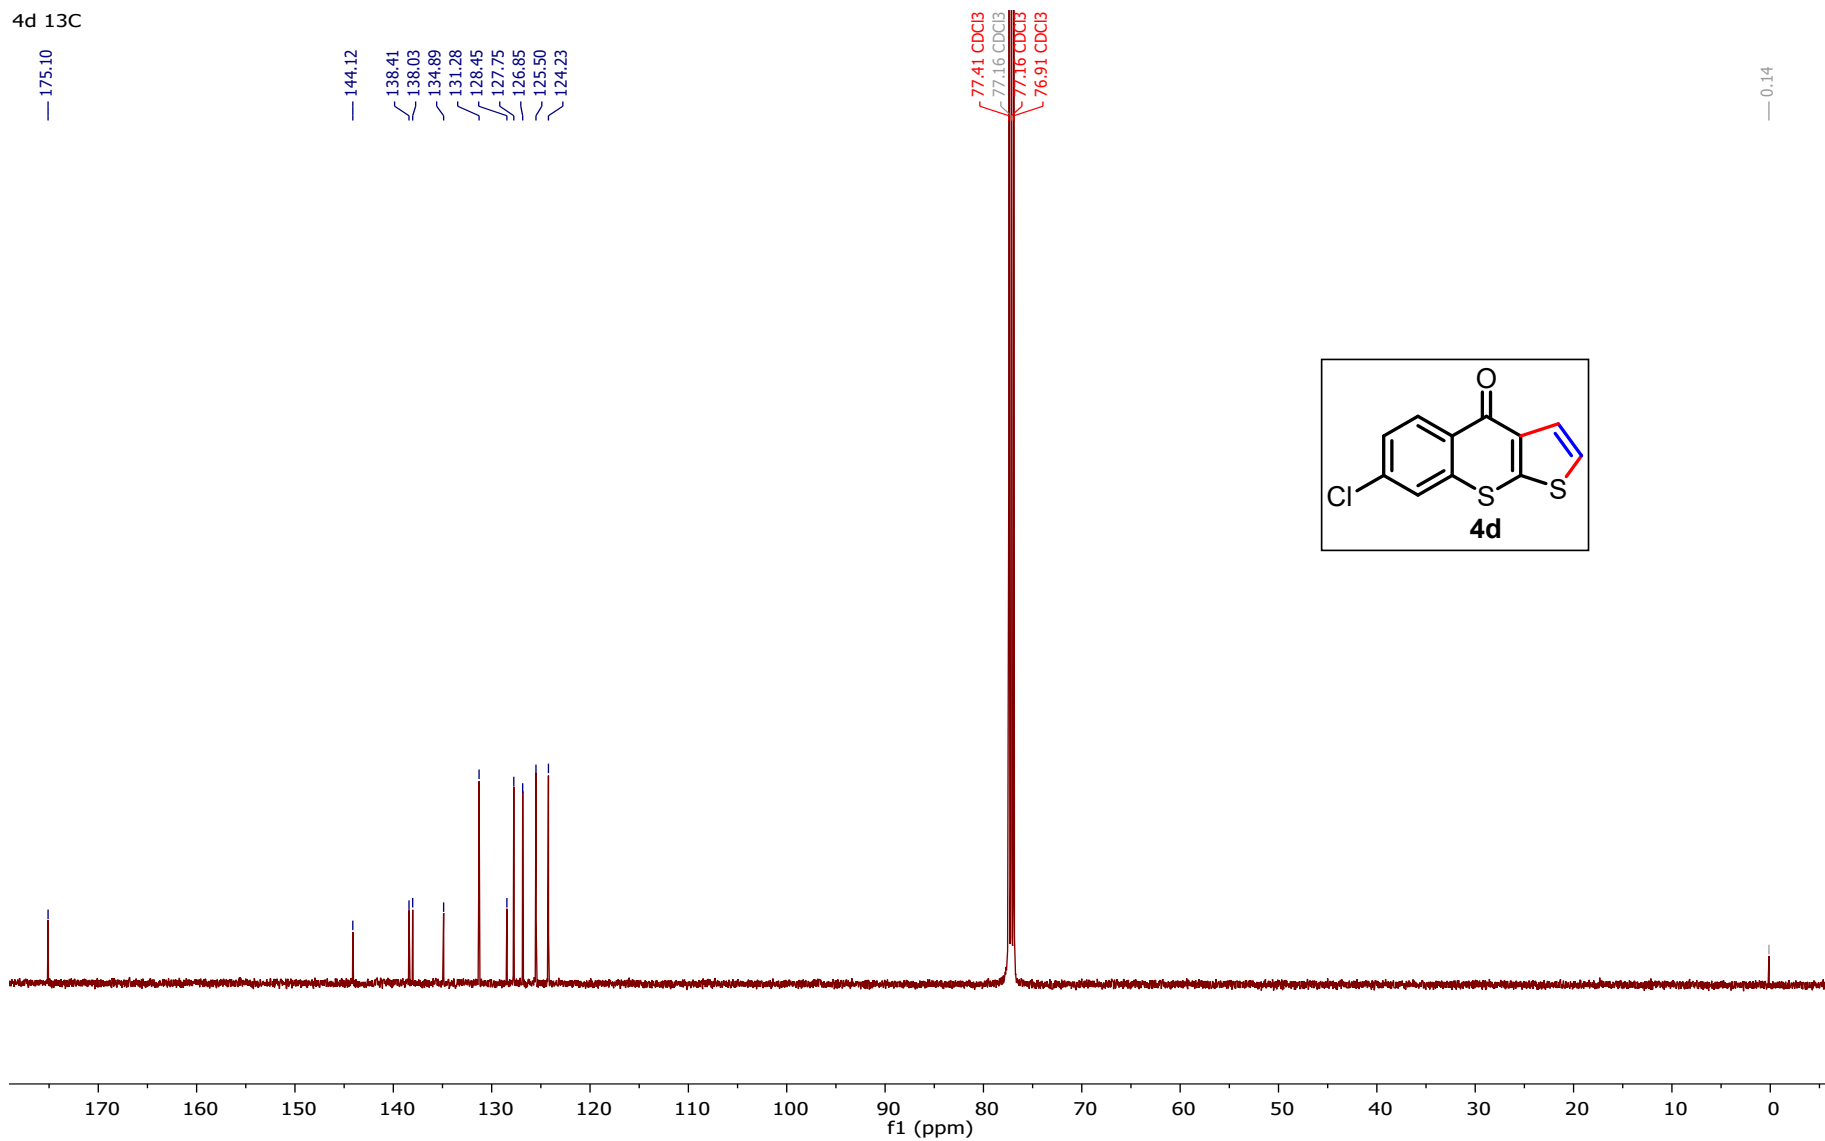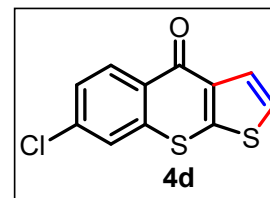

DEPT-135 <sup>13</sup>C {<sup>1</sup>H} NMR (125 MHz, CDCl<sub>3</sub>) spectrum of Compound 4d

— 131.15  
— 127.62  
— 126.71  
— 125.36  
— 124.10

4d DEPT-135

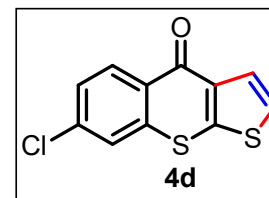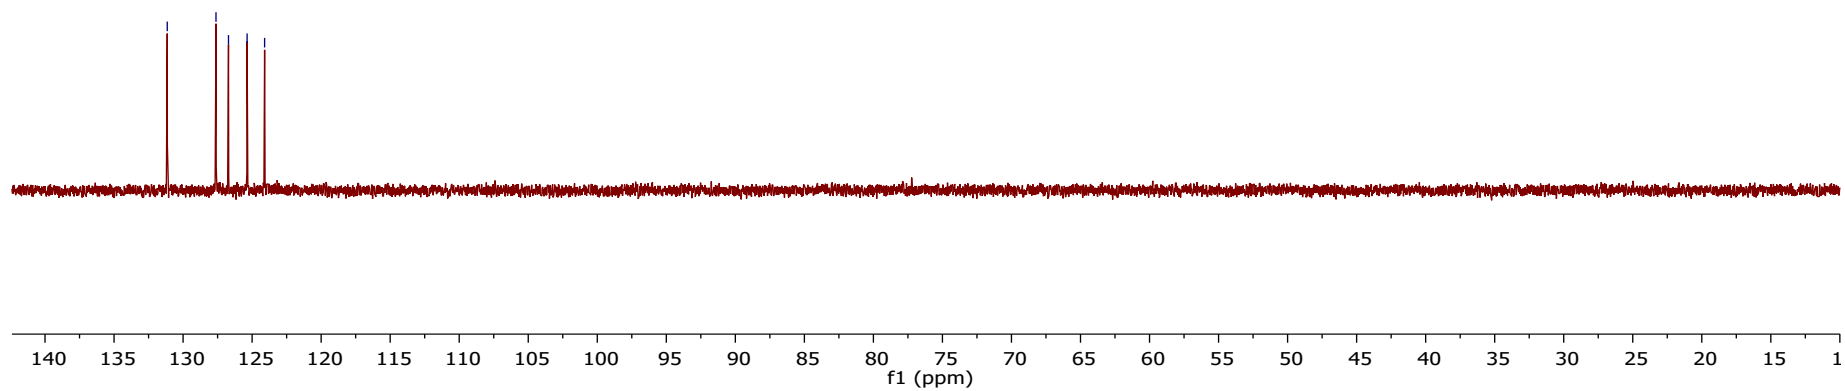

HRMS of compound 4d

|                    |                             |                               |         |                        |                                 |
|--------------------|-----------------------------|-------------------------------|---------|------------------------|---------------------------------|
| <b>Sample Name</b> |                             | <b>Position</b>               | P1-A9   | <b>Instrument Name</b> | QTOF                            |
| <b>User Name</b>   | SYSTEM (SYSTEM)             | <b>Inj Vol</b>                | 5       | <b>InjPosition</b>     |                                 |
| <b>Sample Type</b> | Sample                      | <b>IRM Calibration Status</b> | Success | <b>Data Filename</b>   | DT-3.d                          |
| <b>ACQ Method</b>  | DIRECT MASS_POSITIVE_01_1.m | <b>Comment</b>                |         | <b>Acquired Time</b>   | 19-08-2025 15:48:20 (UTC+05:30) |

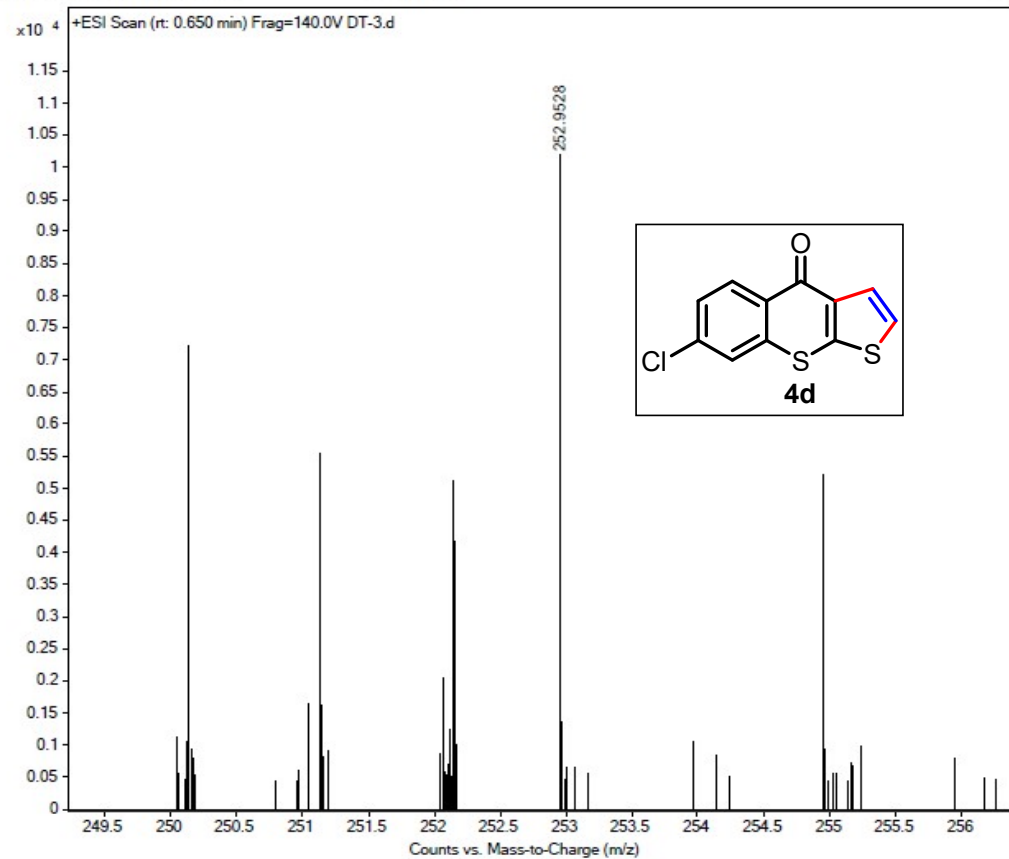

<sup>1</sup>H NMR (500 MHz, CDCl<sub>3</sub>) spectrum of Compound 4e

ATK-DK-DT-1-1H.1.fid — ATK-DK-DT-1-1H

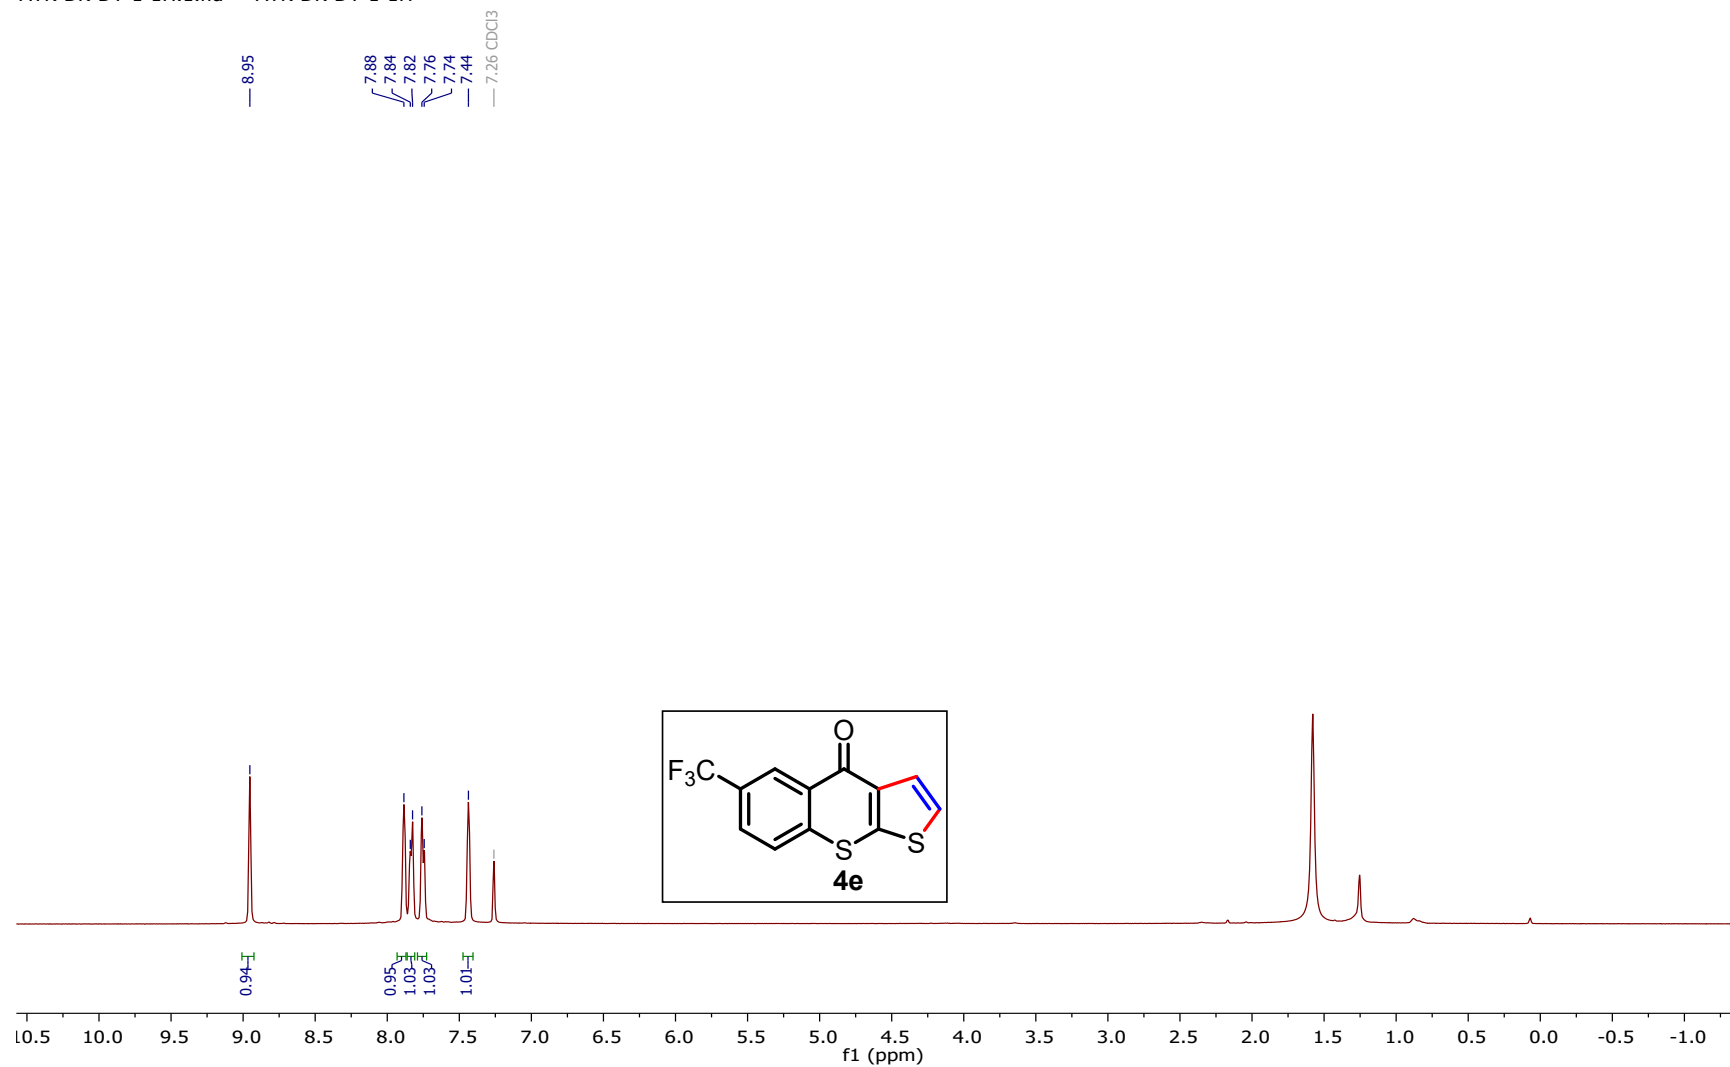

<sup>13</sup>C {<sup>1</sup>H} NMR (125 MHz, CDCl<sub>3</sub>) spectrum of Compound 4e

4e 13C

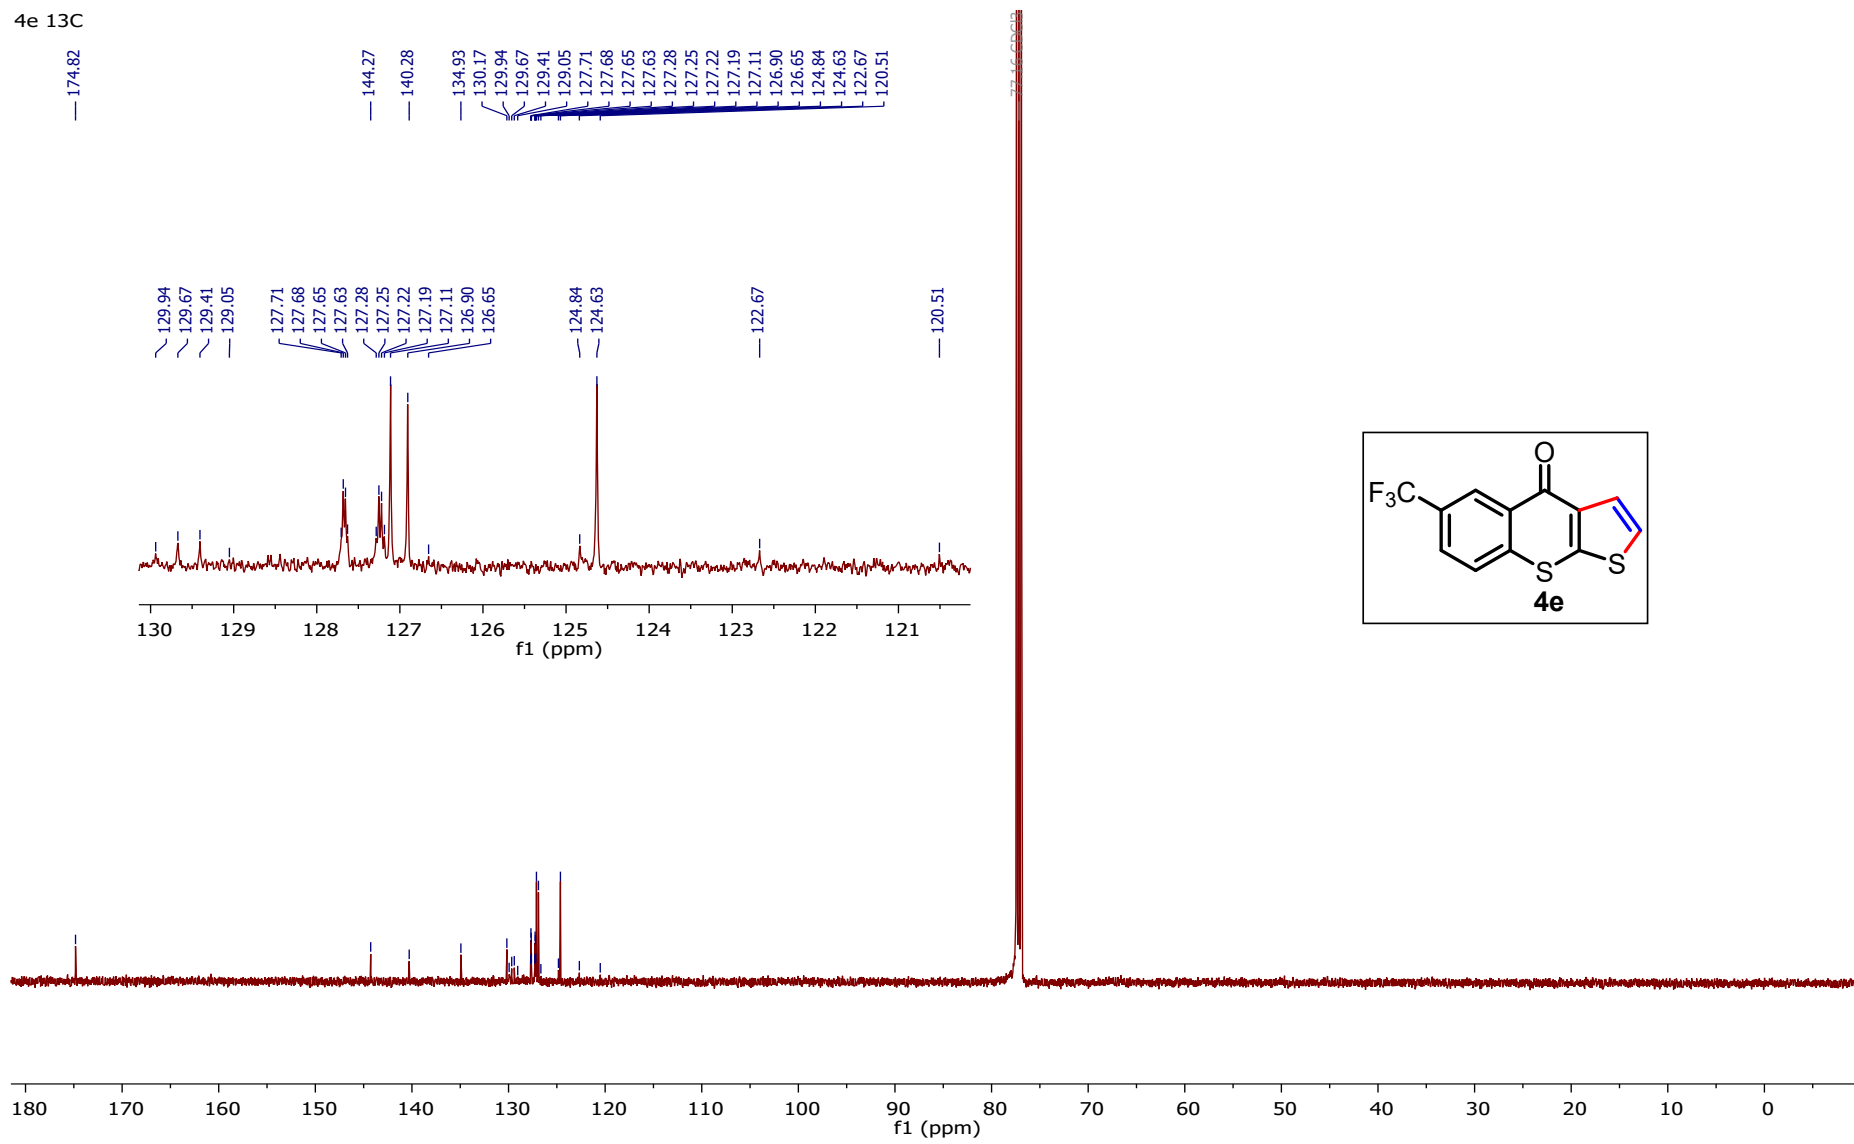

**<sup>19</sup>F NMR of compound 4e**

ATK-DK-DT-1-19F.3.fid — ATK-DK-DT-1-19F

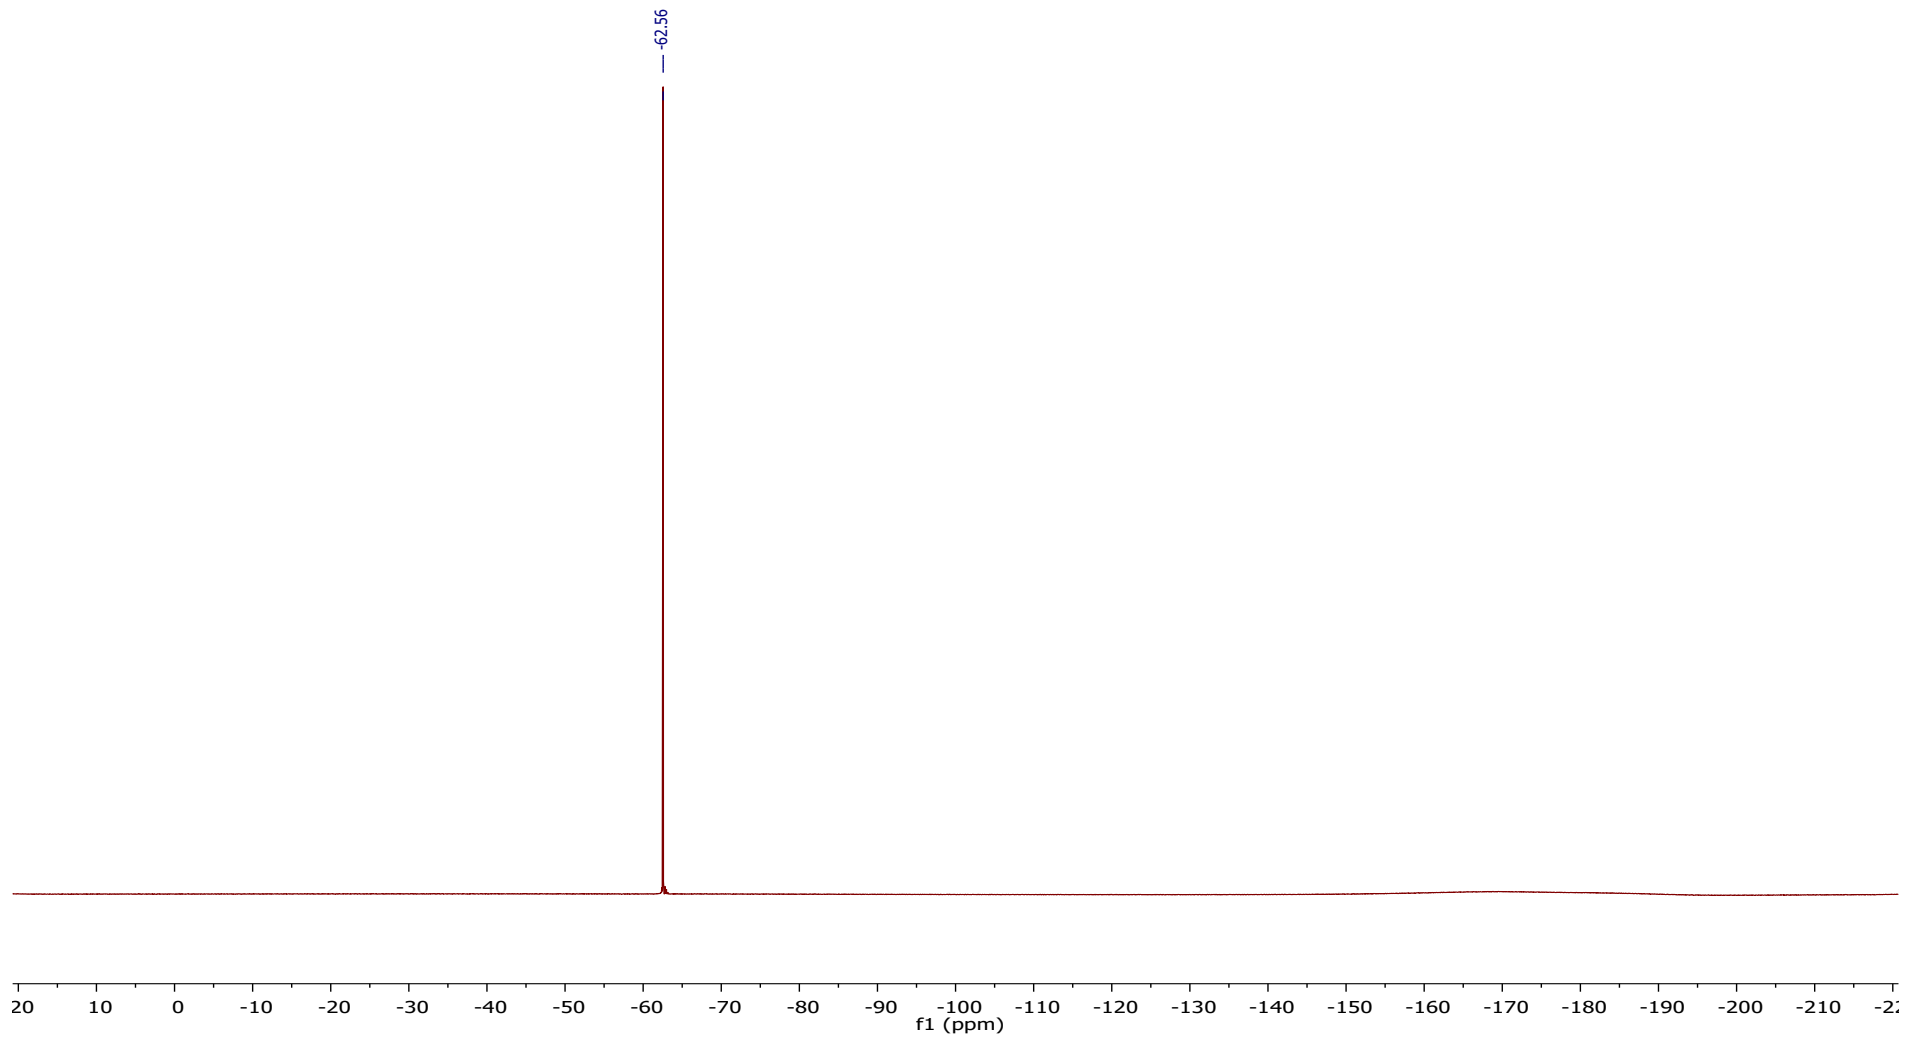

## HRMS of compound 4e

|                    |                                |                               |         |                        |                                 |
|--------------------|--------------------------------|-------------------------------|---------|------------------------|---------------------------------|
| <b>Sample Name</b> | Sample17                       | <b>Position</b>               | P1-B5   | <b>Instrument Name</b> | QTOF                            |
| <b>User Name</b>   | SYSTEM (SYSTEM)                | <b>Inj Vol</b>                | 5       | <b>InjPosition</b>     |                                 |
| <b>Sample Type</b> | Sample                         | <b>IRM Calibration Status</b> | Success | <b>Data Filename</b>   | DK-DT-1,d                       |
| <b>ACQ Method</b>  | DIRECT MASS_POSITIVE_50_1500.m | <b>Comment</b>                |         | <b>Acquired Time</b>   | 23-06-2025 10:47:06 (UTC+05:30) |

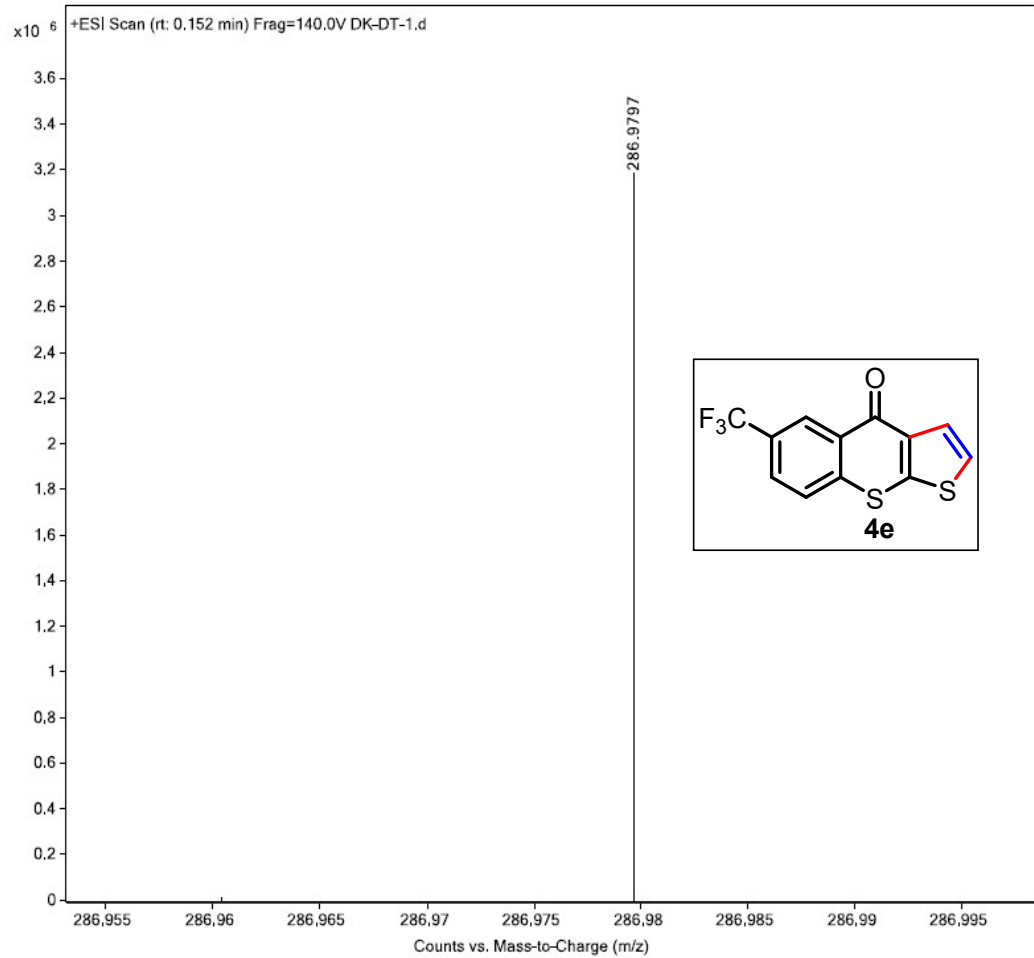

<sup>1</sup>H NMR (500 MHz, CDCl<sub>3</sub>) spectrum of Compound 4f

4f 1H

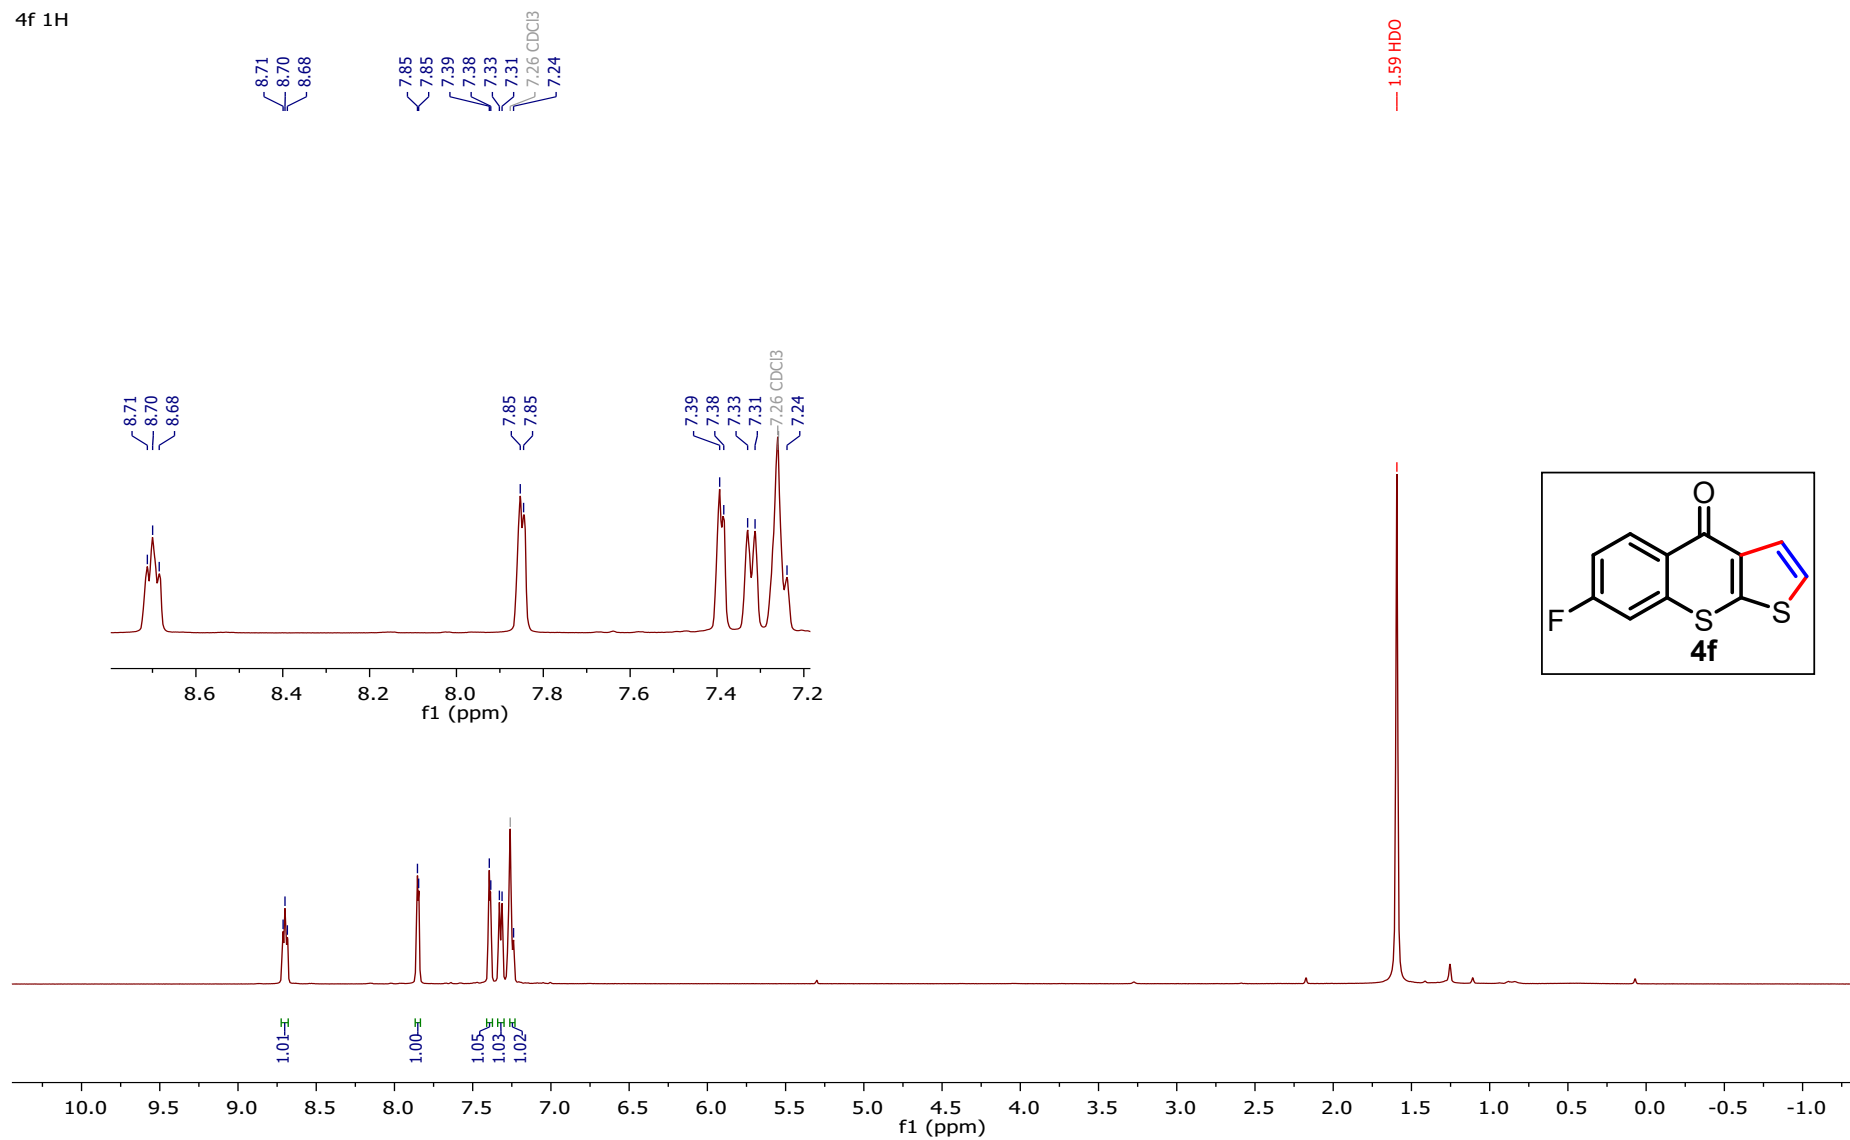

**$^{13}\text{C}$  { $^1\text{H}$ } NMR (125 MHz,  $\text{CDCl}_3$ ) spectrum of Compound 4f**

4f 13C.5.fid — ATK-DT-VE-13C

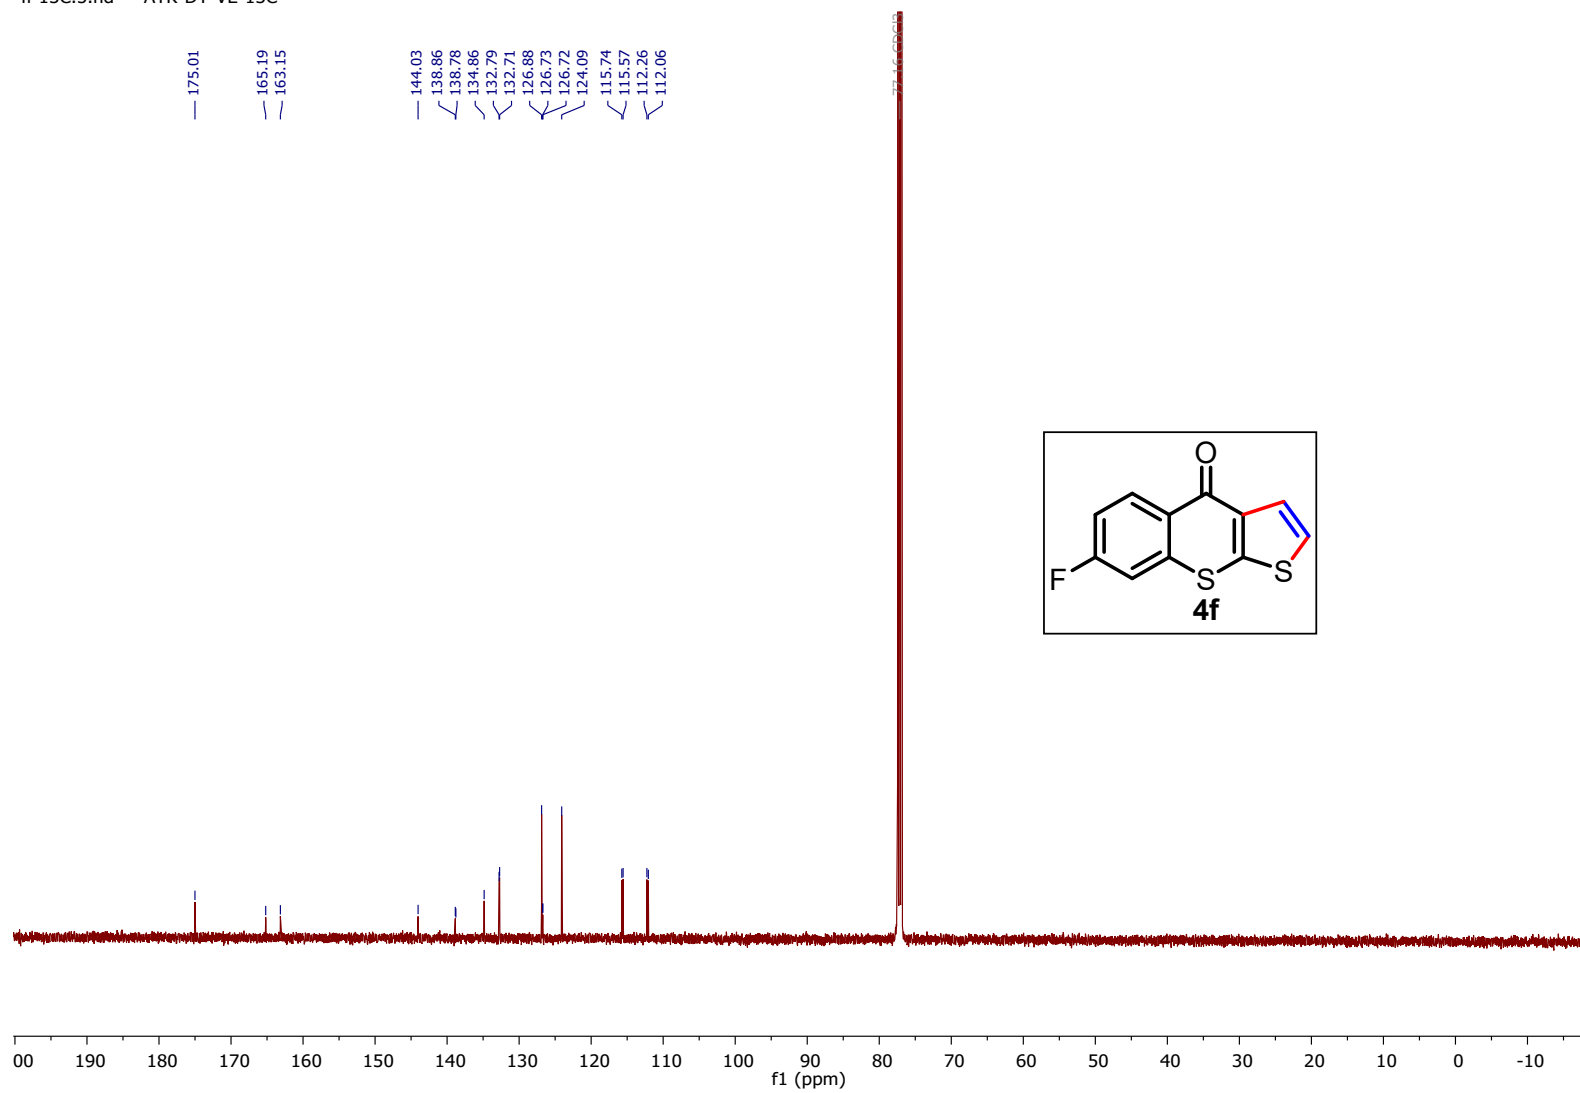

# <sup>19</sup>F NMR of Compound 4f

4f 19F

-105.78

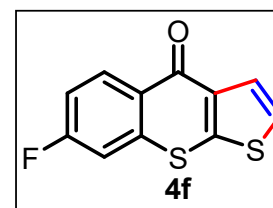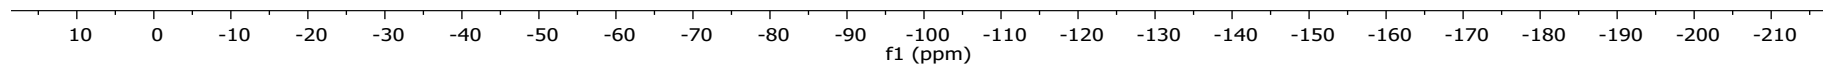

### HRMS of compound 4f

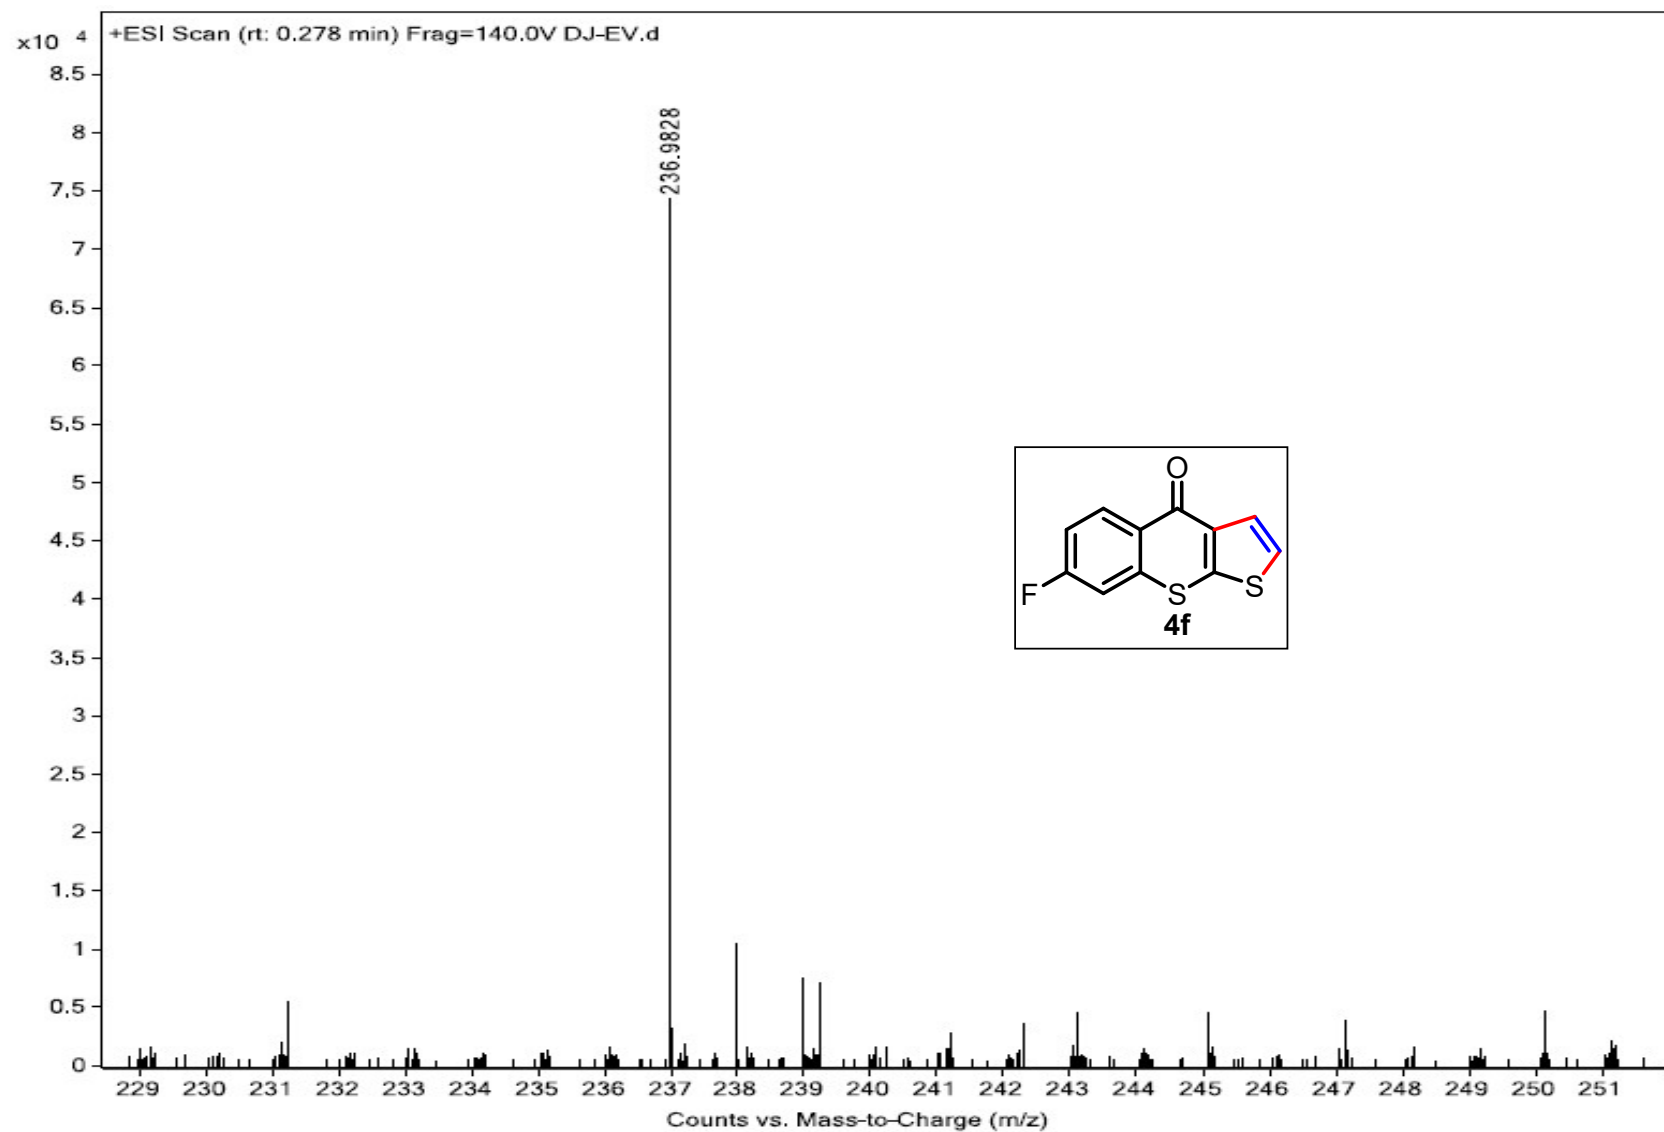

<sup>1</sup>H NMR (400 MHz, CDCl<sub>3</sub>) spectrum of Compound 7a

7a 1H

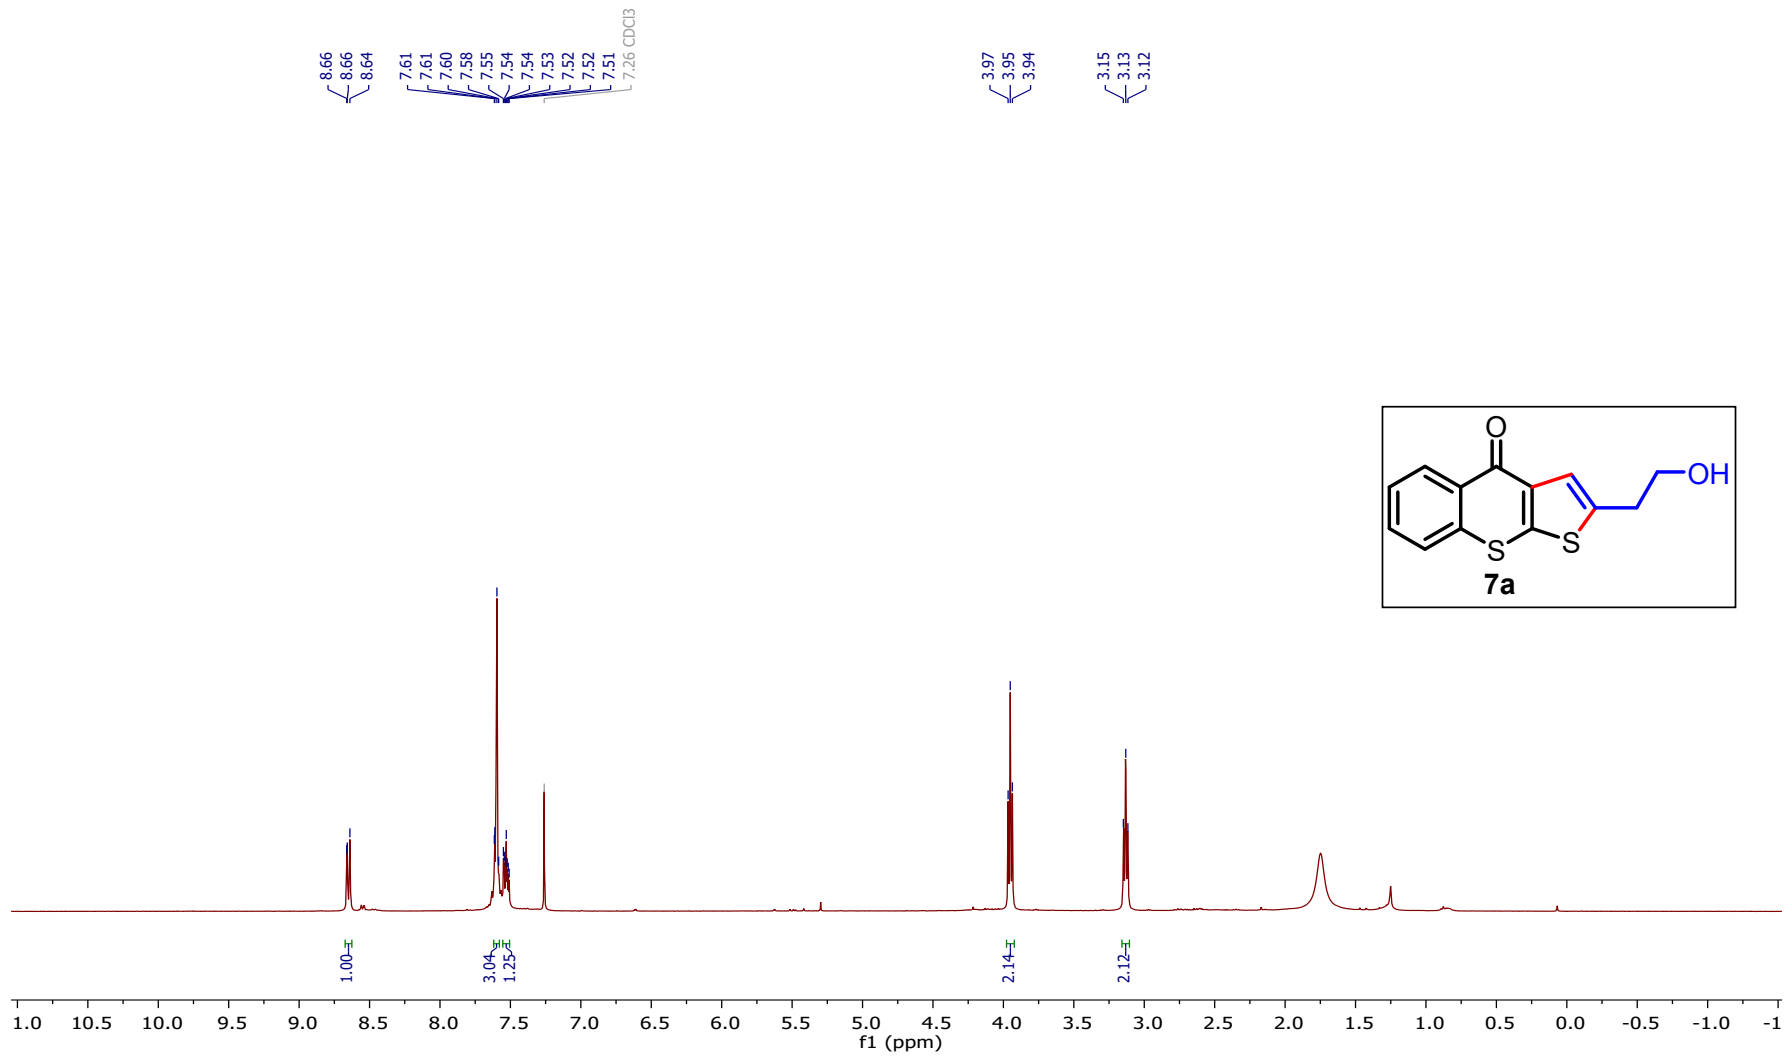

<sup>13</sup>C {<sup>1</sup>H} NMR (125 MHz, CDCl<sub>3</sub>) spectrum of Compound 7a

7a 13C

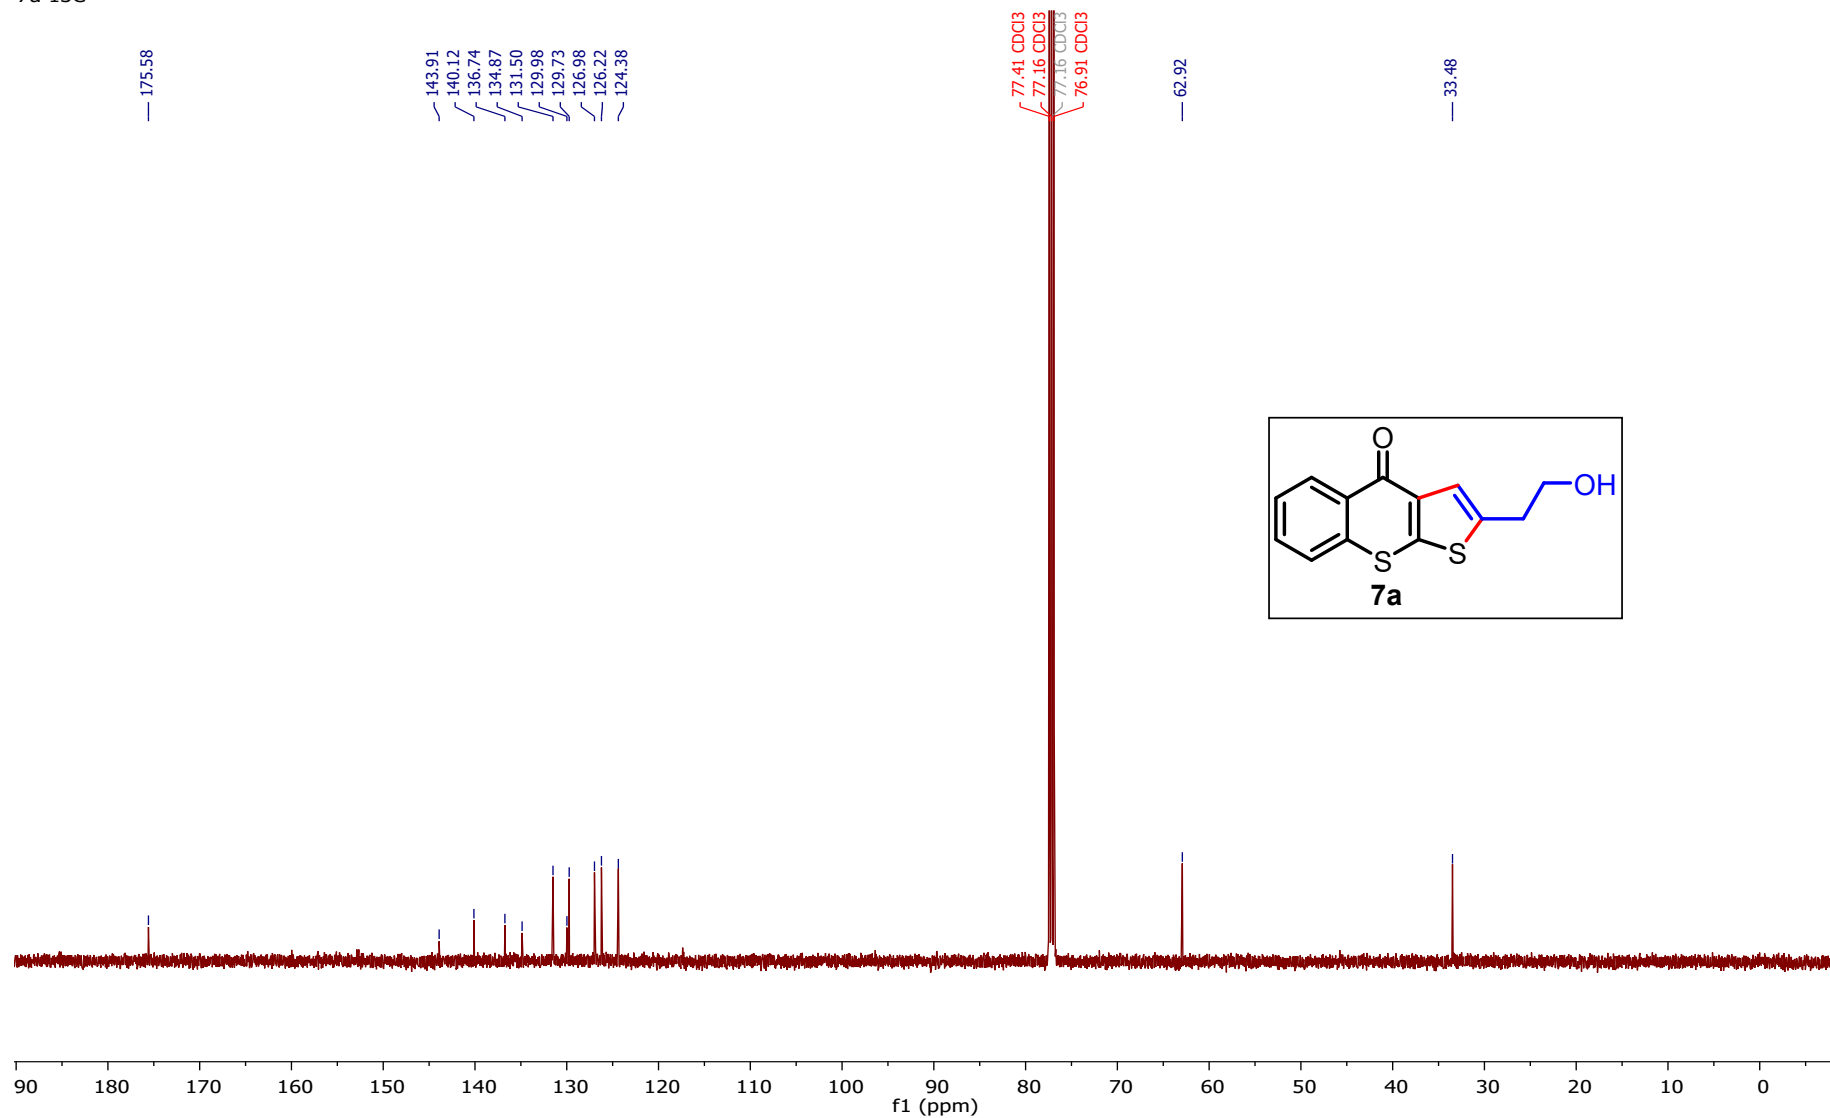

## HRMS of compound 7a

|             |                             |                        |         |                 |                                 |
|-------------|-----------------------------|------------------------|---------|-----------------|---------------------------------|
| Sample Name | Sample34                    | Position               | P1-D1   | Instrument Name | QTOF                            |
| User Name   | SYSTEM (SYSTEM)             | Inj Vol                | 5       | InjPosition     |                                 |
| Sample Type | Sample                      | IRM Calibration Status | Success | Data Filename   | DF-5.d                          |
| ACQ Method  | DIRECT MASS_POSITIVE_01_1.m | Comment                |         | Acquired Time   | 28-08-2025 12:29:56 (UTC+05:30) |

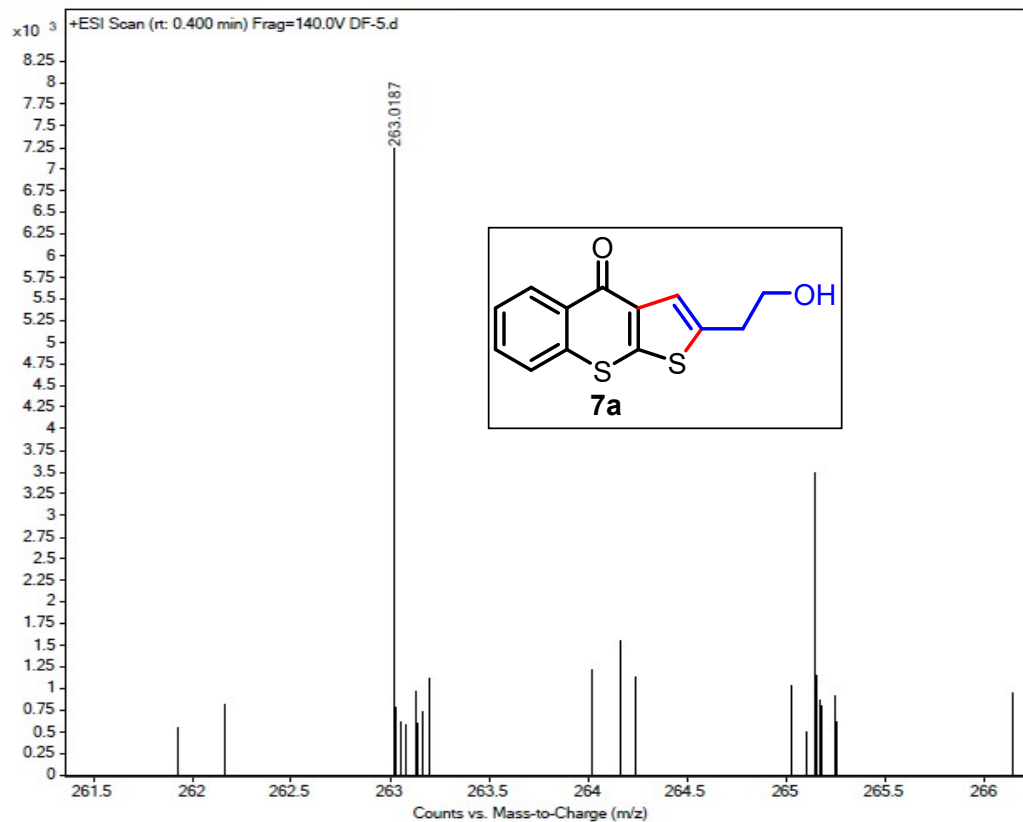

**$^1\text{H}$  NMR (400 MHz,  $\text{CDCl}_3$ ) spectrum of Compound 7b**

ATK-DF-D-1-1H.1.fid — ATK-DF-D-1-1H

7.53  
7.51  
7.49  
7.49  
7.45  
7.43  
7.41  
7.26 CDCl<sub>3</sub>

3.95  
3.93  
3.92

3.13  
3.11  
3.10

— 1.78

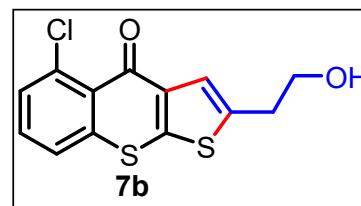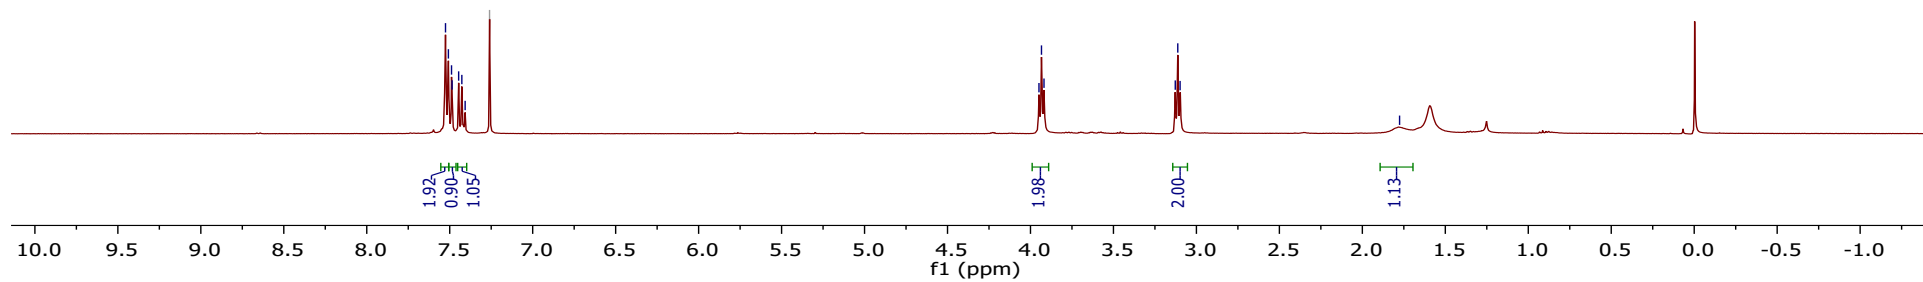

$^{13}\text{C}$   $\{^1\text{H}\}$  NMR (125 MHz,  $\text{CDCl}_3$ ) spectrum of Compound 7b

7b 13C

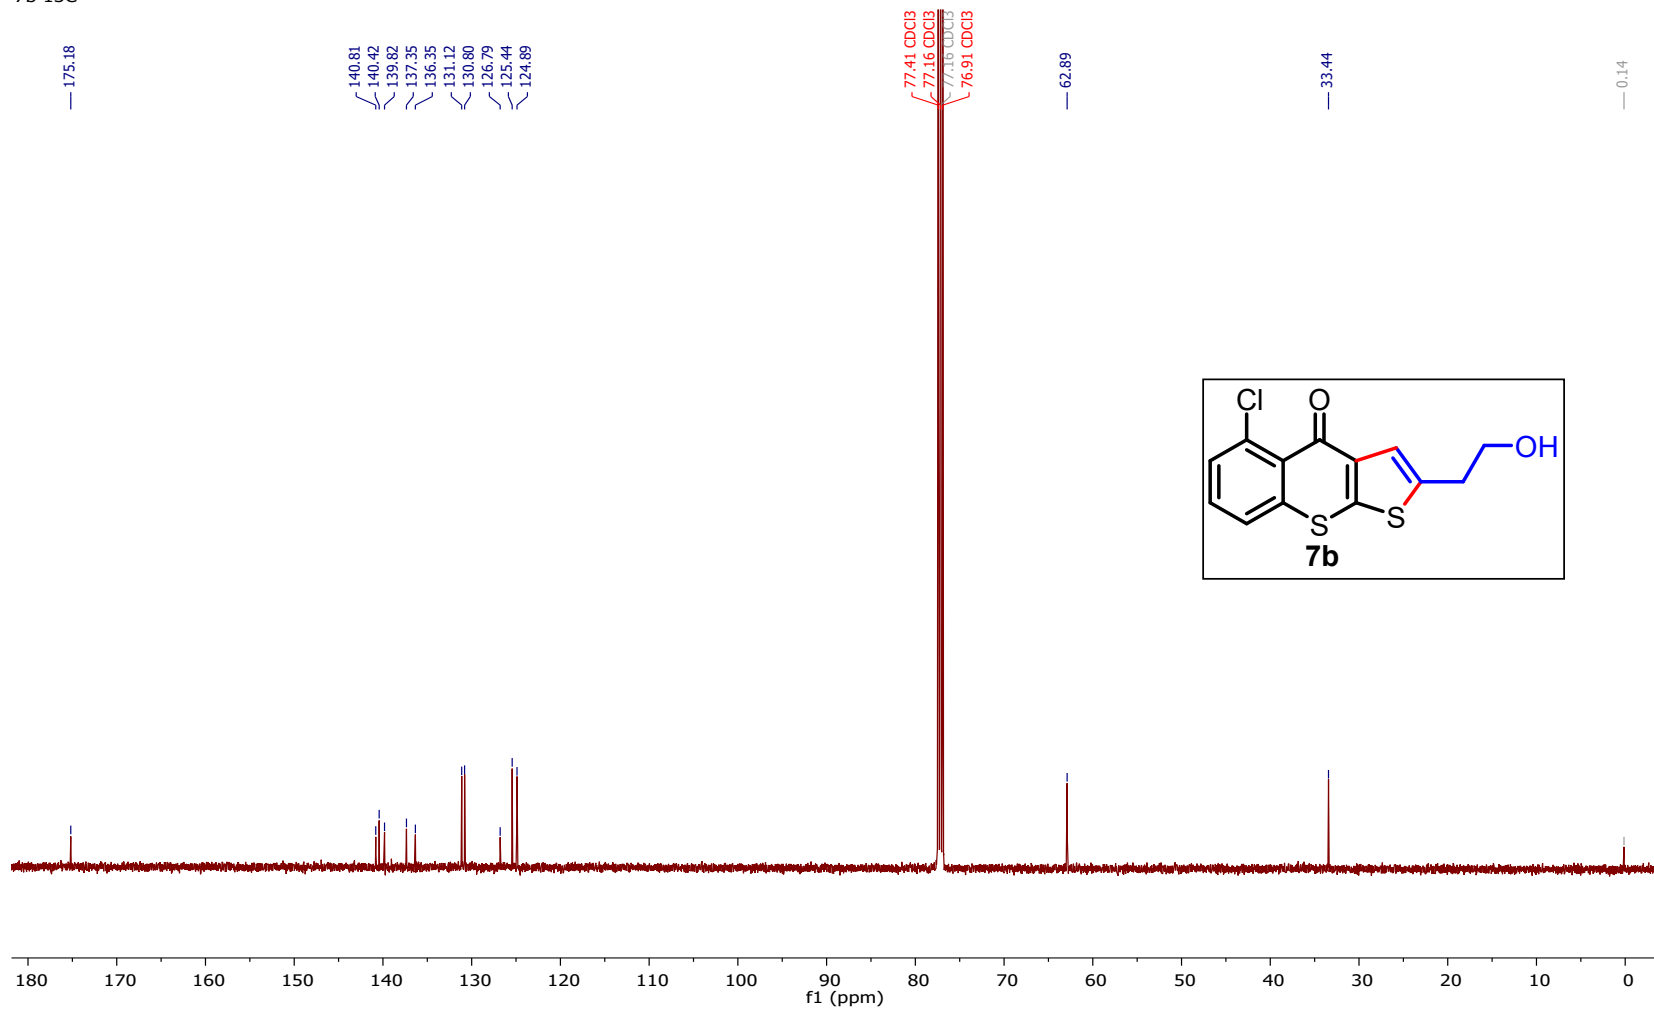

## HRMS of compound 7b

**Sample Name**  
**User Name**  
**Sample Type**  
**ACQ Method**

Sample17  
SYSTEM (SYSTEM)  
Sample  
DIRECT MASS\_POSITIVE\_50\_1500.m

**Position**  
**Inj Vol**  
**IRM Calibration Status**  
**Comment**

P1-B6  
5  
Success

**Instrument Name**  
**InjPosition**  
**Data Filename**  
**Acquired Time**

QTOF  
DF-D,d  
28-08-2025 17:00:18 (UTC+05:30)

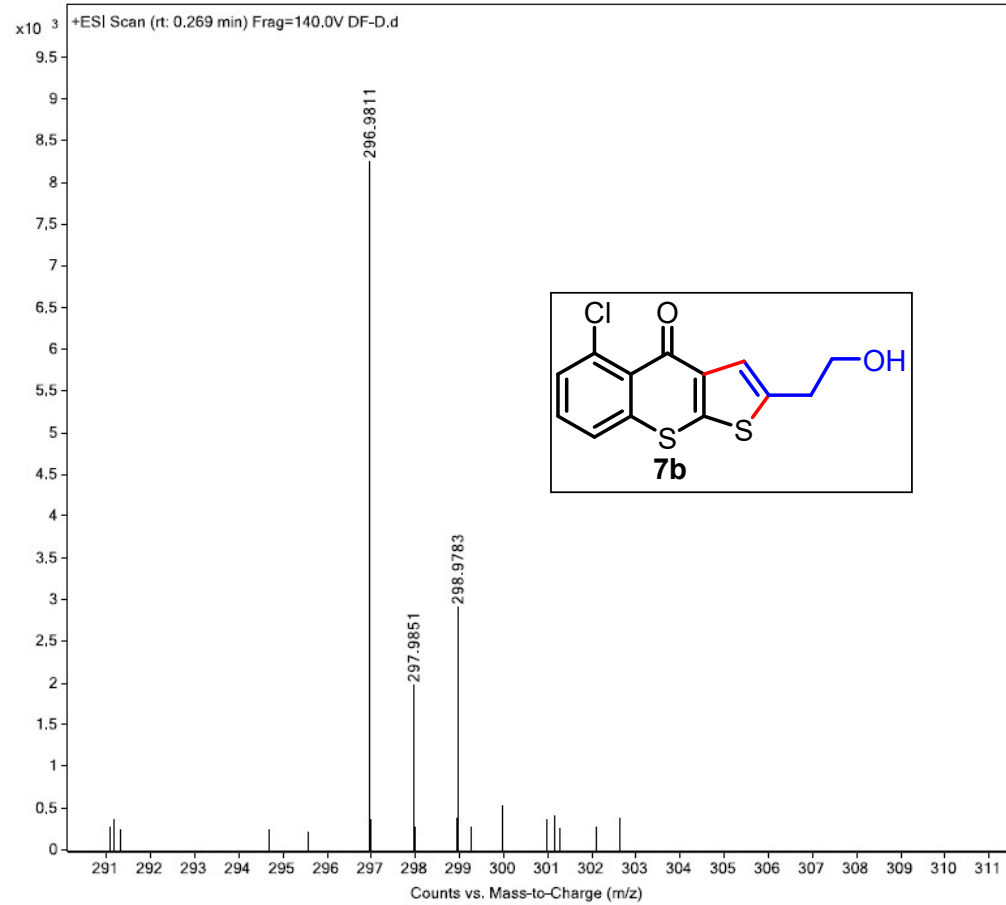

<sup>1</sup>H NMR (500 MHz, CDCl<sub>3</sub>) spectrum of Compound 7c

7c 1H

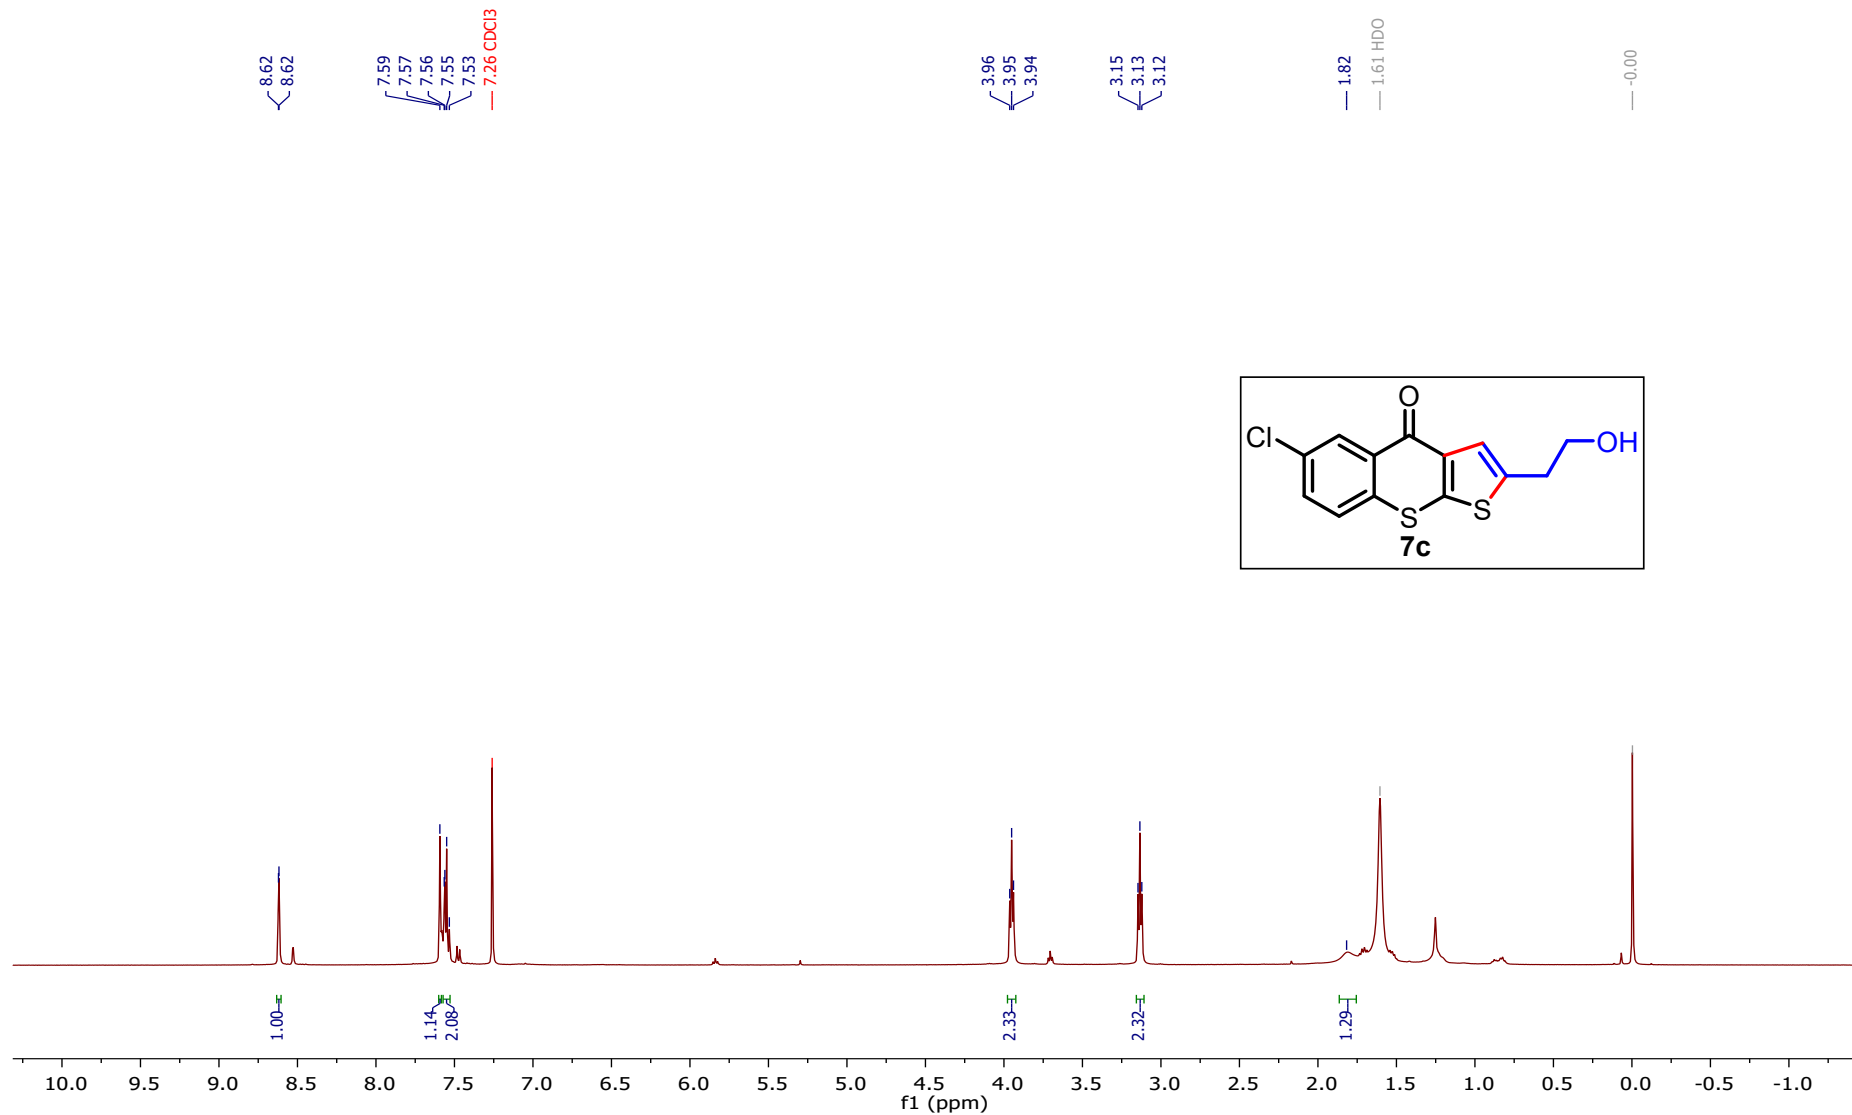

<sup>13</sup>C {<sup>1</sup>H} NMR (125 MHz, CDCl<sub>3</sub>) spectrum of Compound 7c

7c 13C

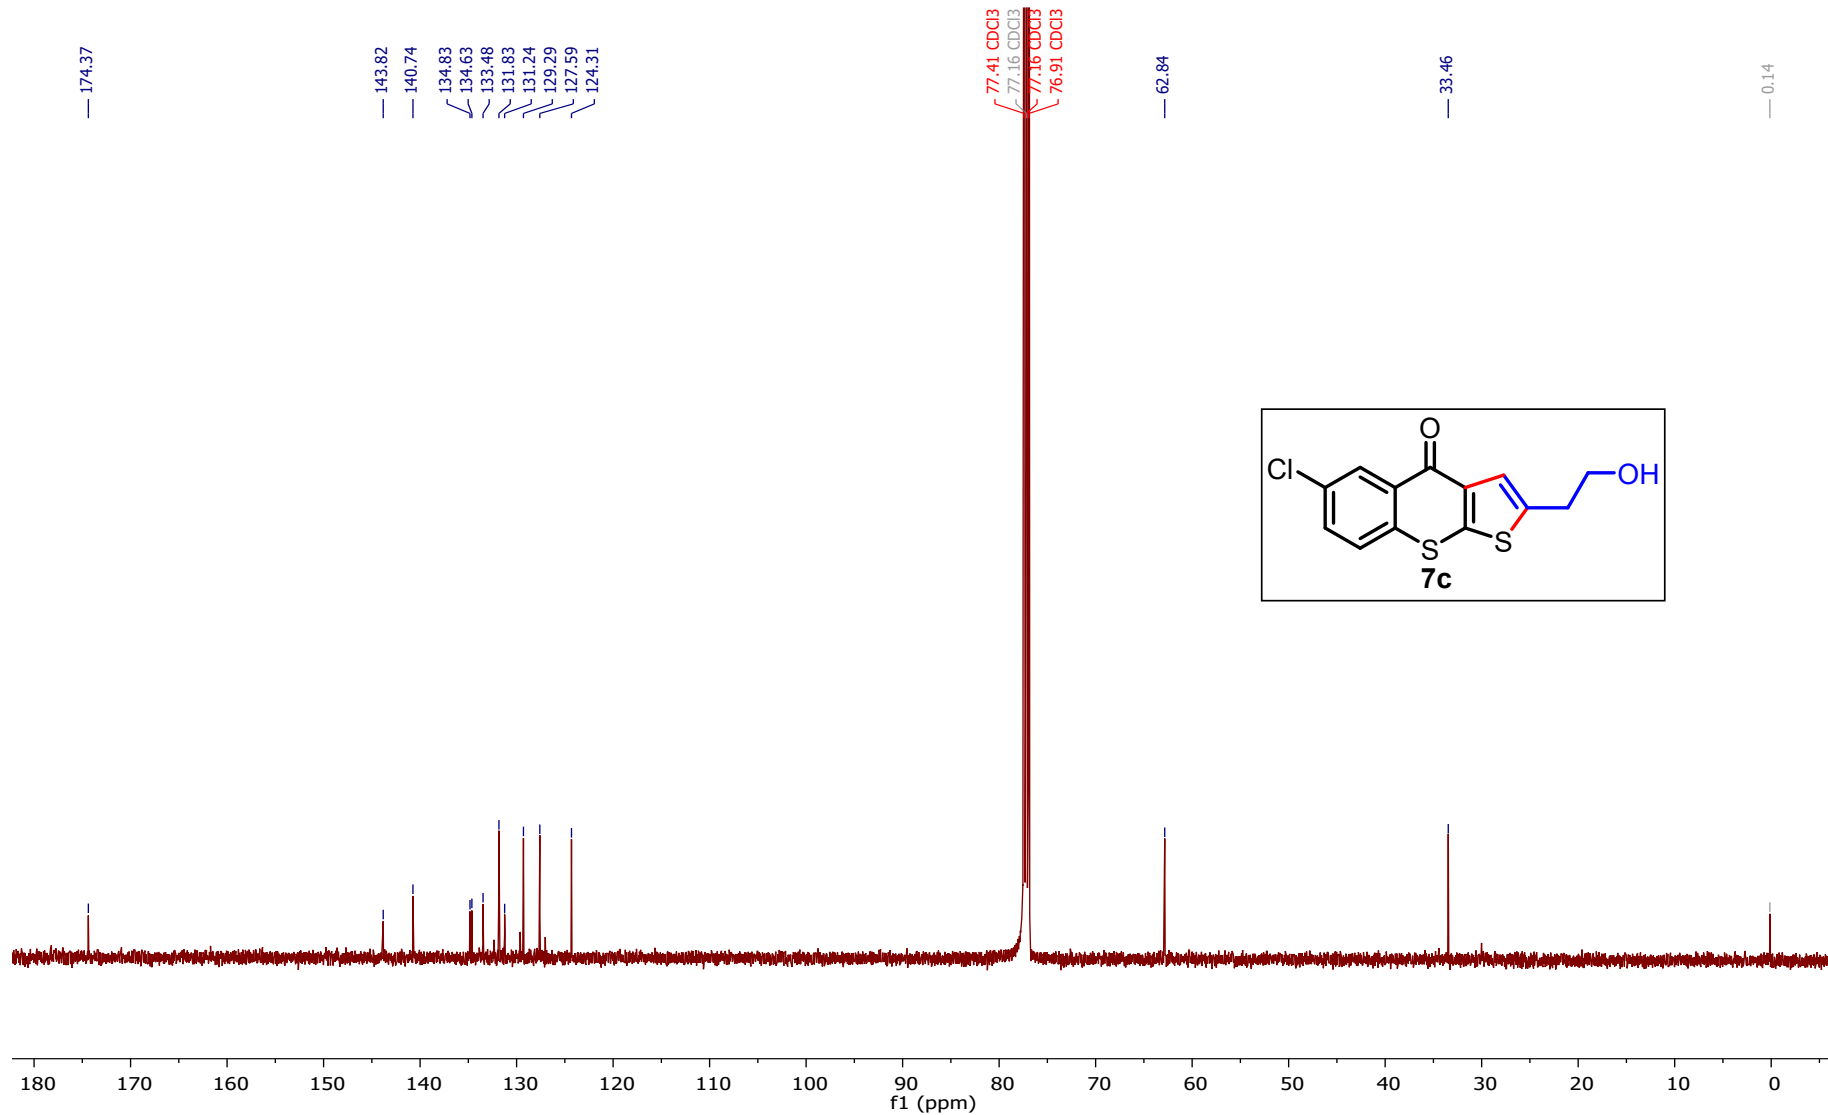

### HRMS of compound 7c

|                    |                             |                               |         |                        |                                 |
|--------------------|-----------------------------|-------------------------------|---------|------------------------|---------------------------------|
| <b>Sample Name</b> | Sample31                    | <b>Position</b>               | P1-C9   | <b>Instrument Name</b> | QTOF                            |
| <b>User Name</b>   | SYSTEM (SYSTEM)             | <b>Inj Vol</b>                | 5       | <b>InjPosition</b>     |                                 |
| <b>Sample Type</b> | Sample                      | <b>IRM Calibration Status</b> | Success | <b>Data Filename</b>   | DF-A,d                          |
| <b>ACQ Method</b>  | DIRECT MASS_POSITIVE_01_1.m | <b>Comment</b>                |         | <b>Acquired Time</b>   | 28-08-2025 12:24:30 (UTC+05:30) |

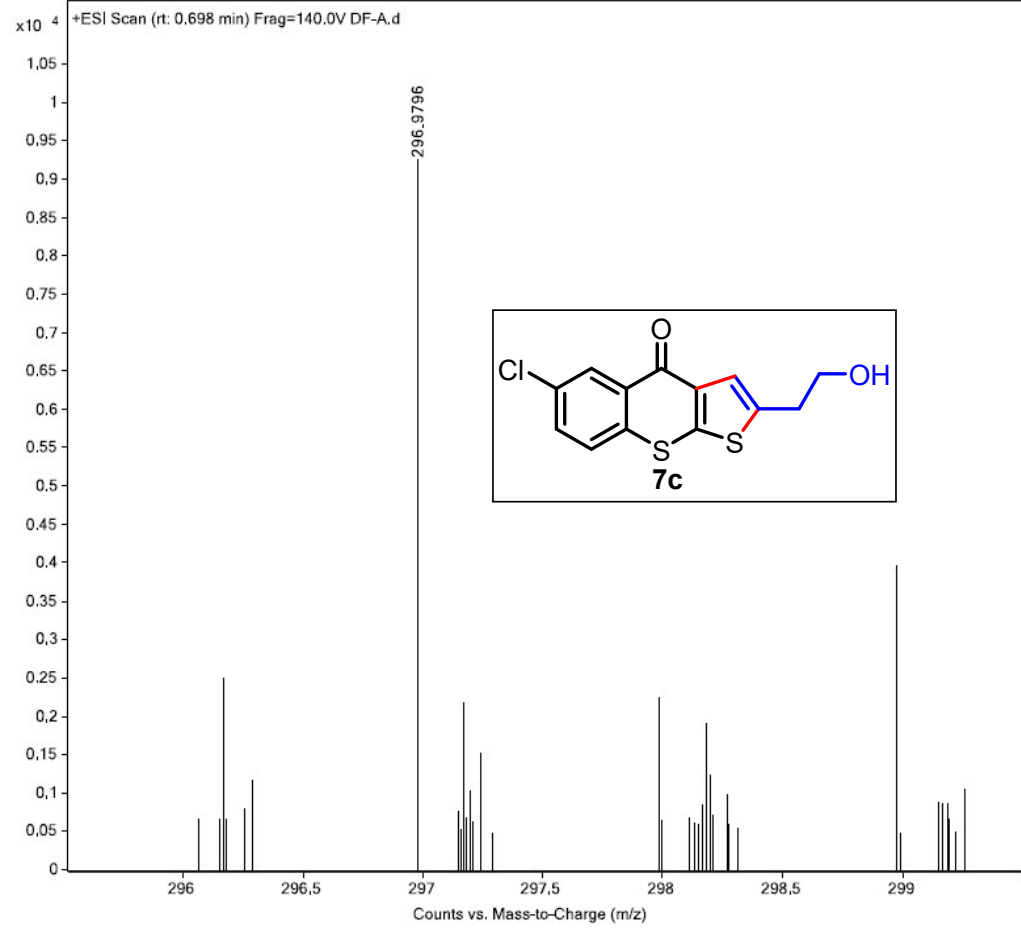

# <sup>1</sup>H NMR (500 MHz, CDCl<sub>3</sub>) spectrum of Compound 7d

7d 1H

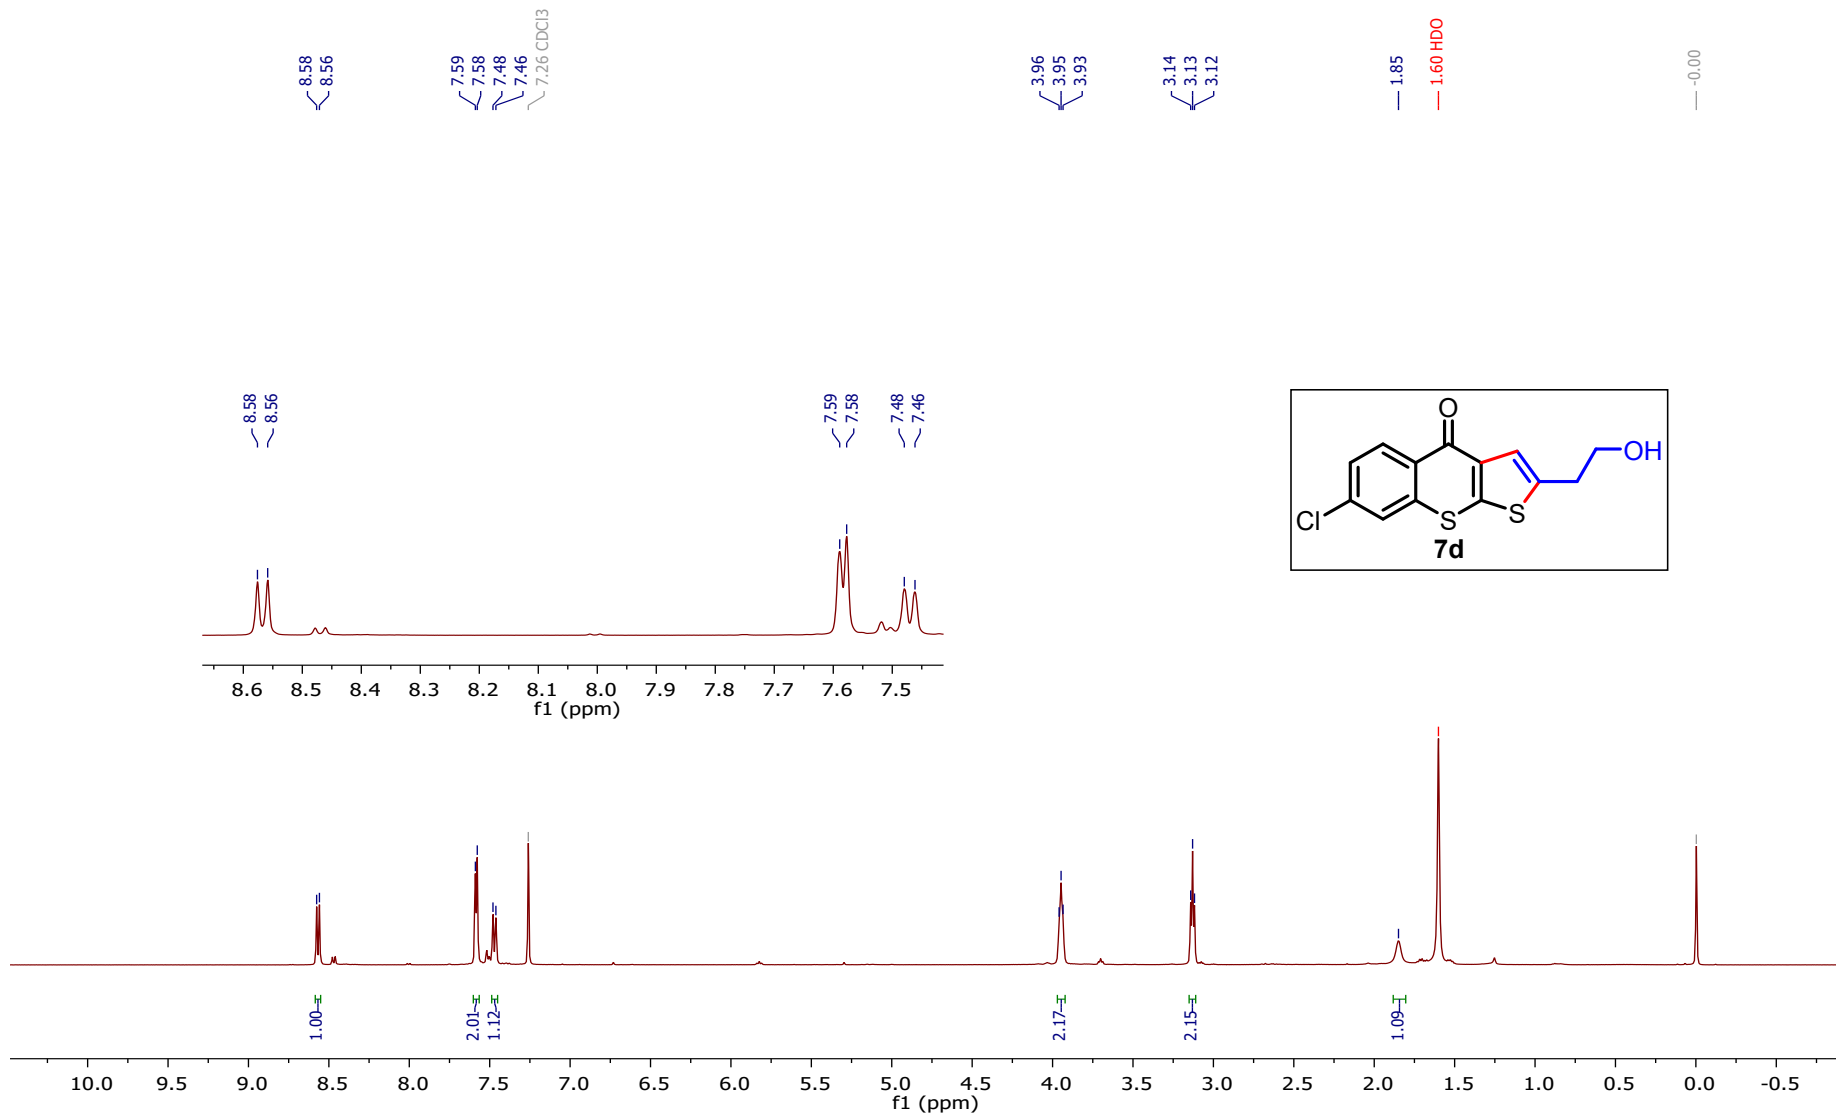

<sup>13</sup>C {<sup>1</sup>H} NMR (125 MHz, CDCl<sub>3</sub>) spectrum of Compound 7d

7d 13d

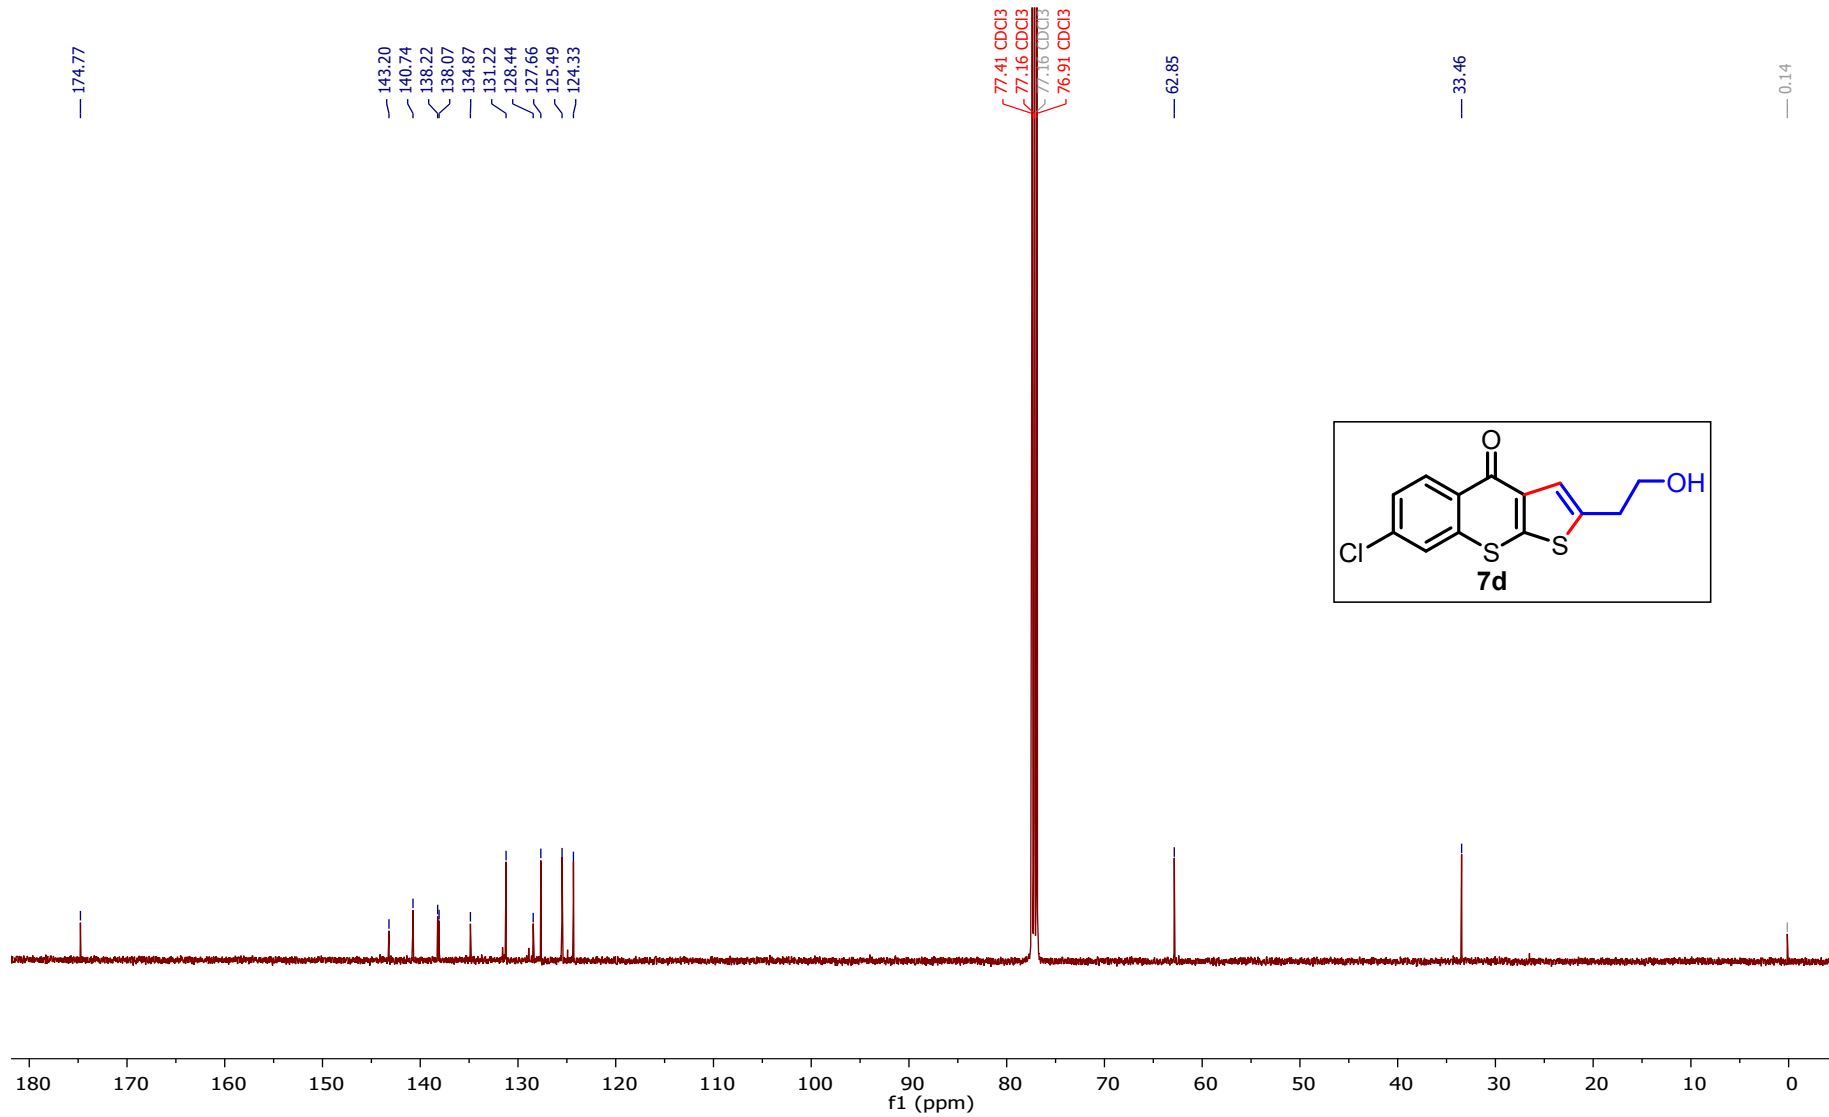

DEPT-135  $^{13}\text{C}$   $\{^1\text{H}\}$  NMR (125 MHz,  $\text{CDCl}_3$ ) spectrum of Compound 7d

7d DEPT-135

131.07  
127.52  
125.35  
124.18

77.23  $\text{CDCl}_3$

62.71

33.32

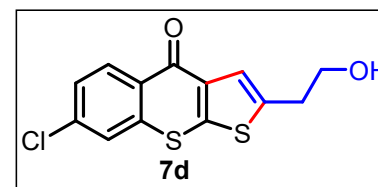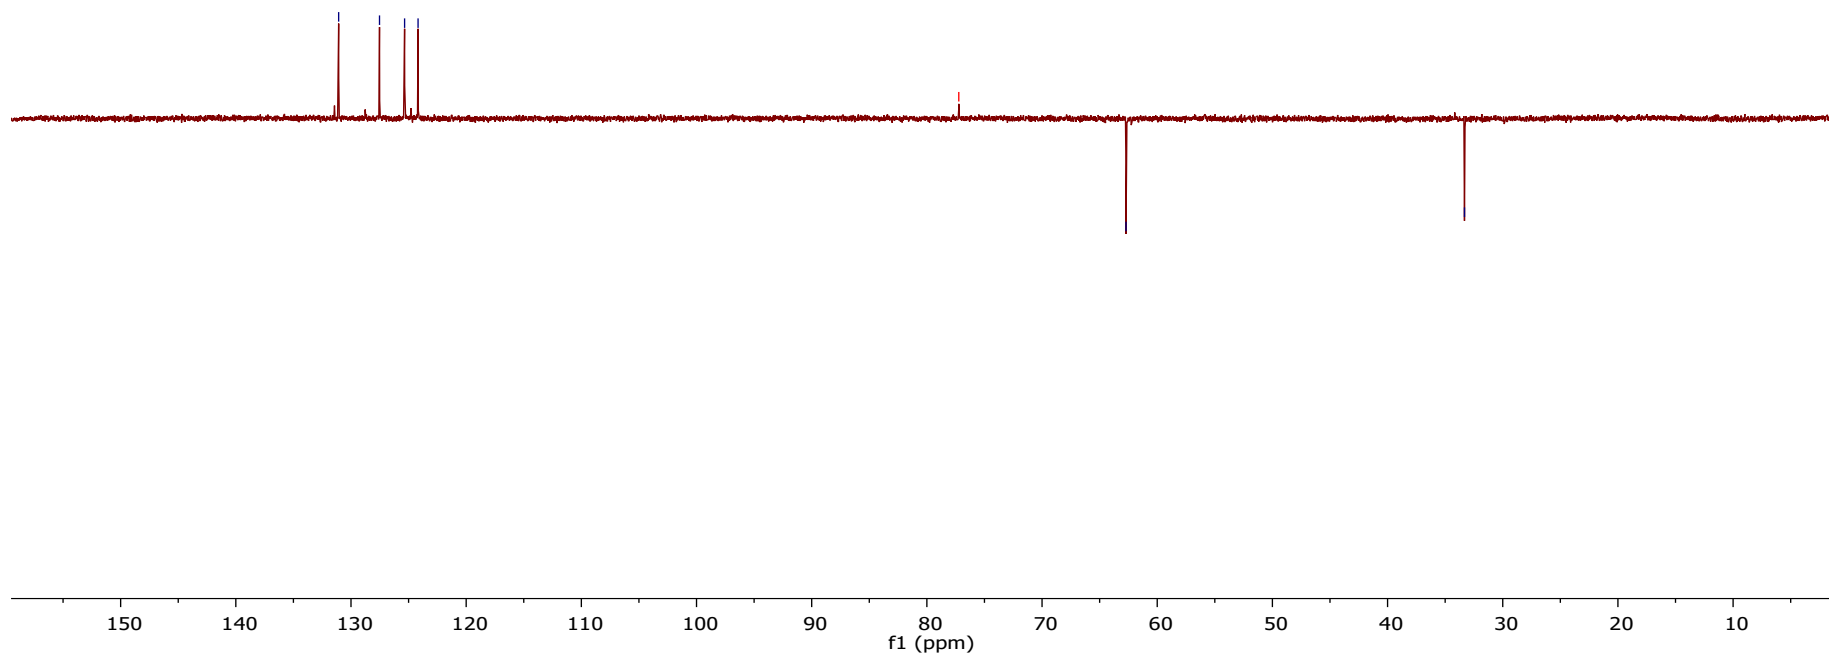

## HRMS of compound 7d

|             |                             |                        |         |                 |                                 |
|-------------|-----------------------------|------------------------|---------|-----------------|---------------------------------|
| Sample Name | Sample32                    | Position               | P1-C10  | Instrument Name | QTOF                            |
| User Name   | SYSTEM (SYSTEM)             | Inj Vol                | 5       | InjPosition     |                                 |
| Sample Type | Sample                      | IRM Calibration Status | Success | Data Filename   | DF-B.d                          |
| ACQ Method  | DIRECT MASS_POSITIVE_01_1.m | Comment                |         | Acquired Time   | 28-08-2025 12:26:19 (UTC+05:30) |

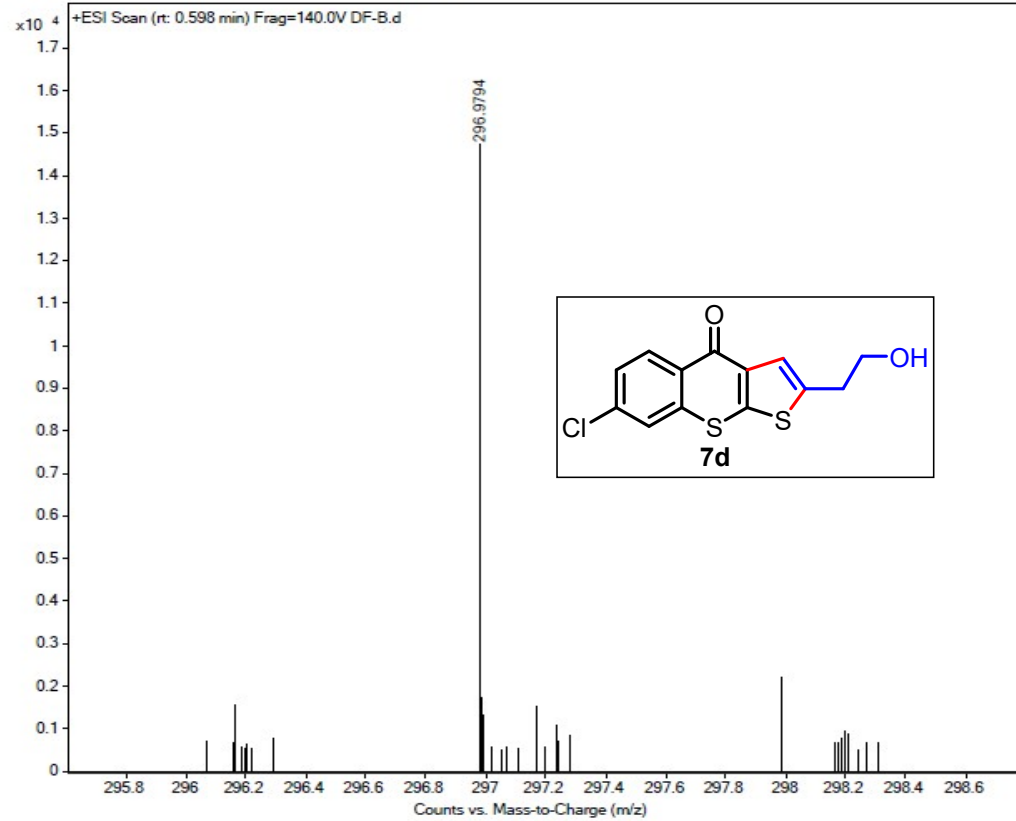

<sup>1</sup>H NMR (400 MHz, CDCl<sub>3</sub>) spectrum of Compound 7e

7e 1H

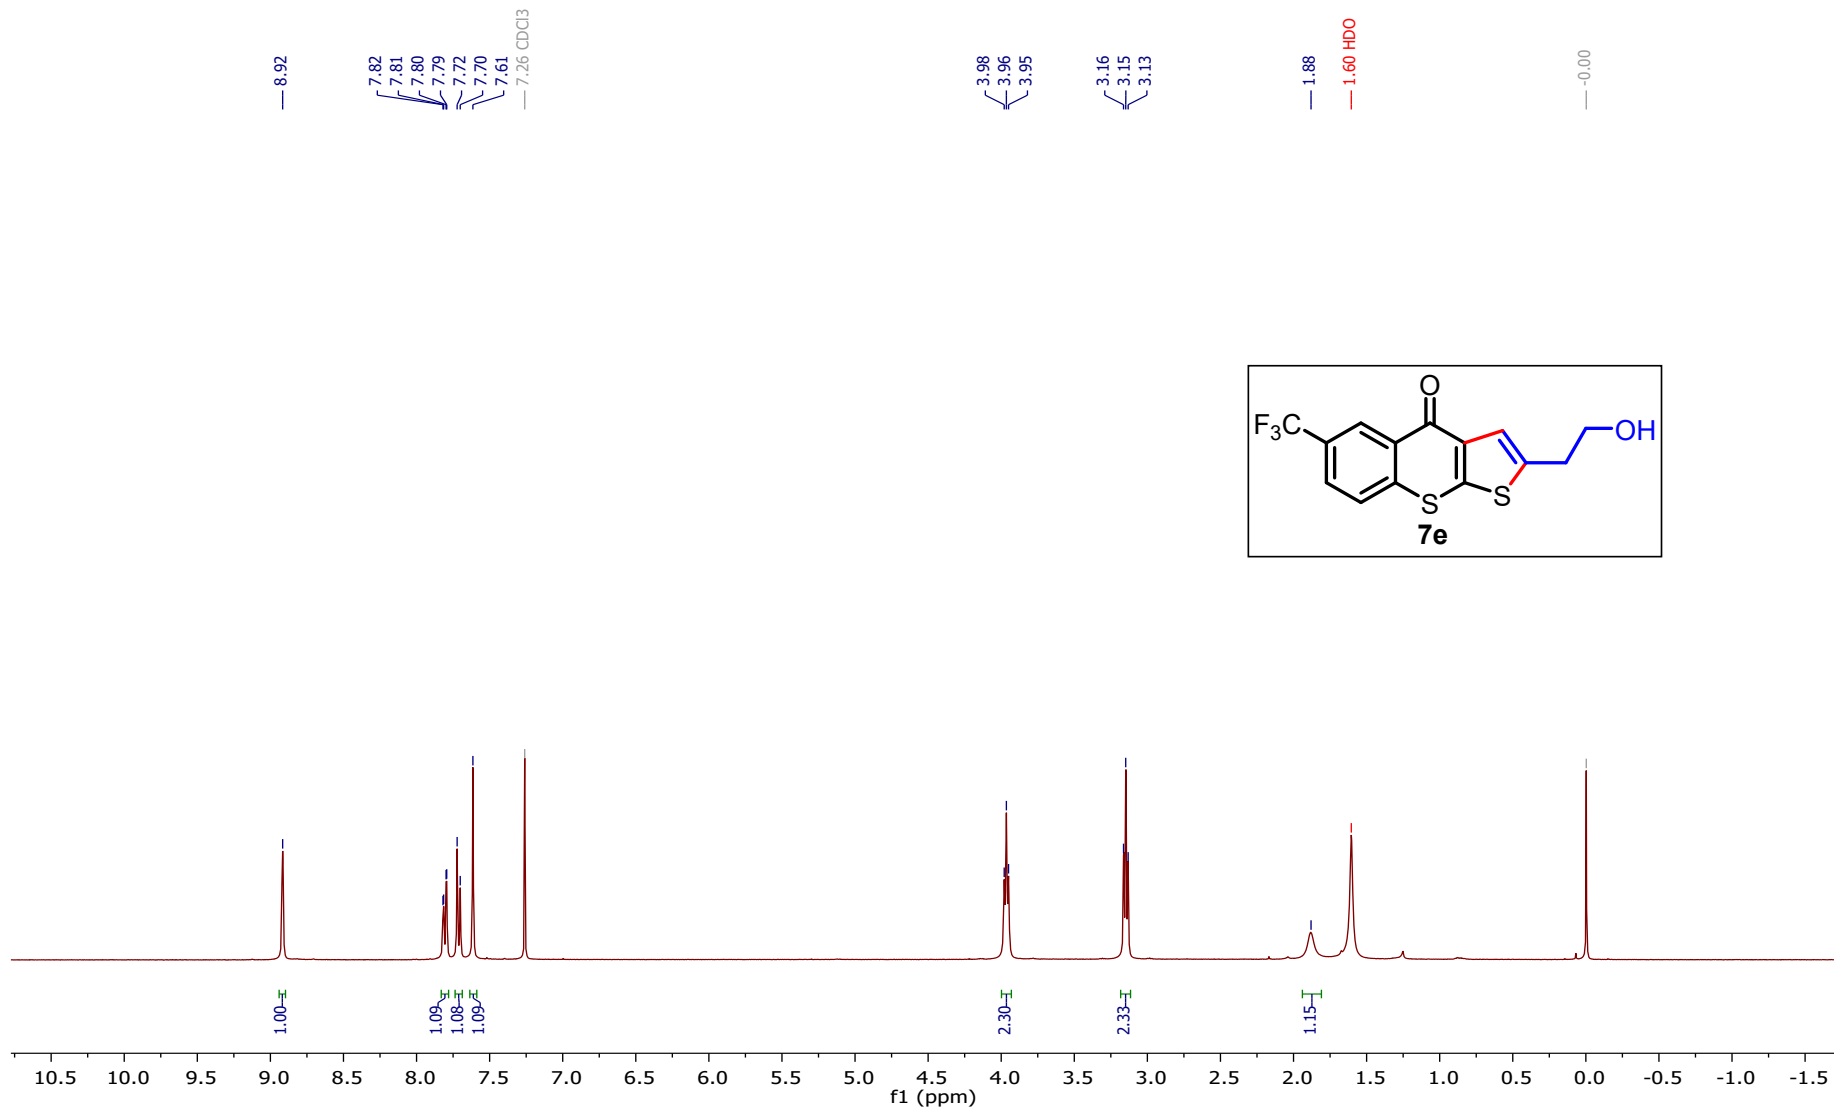

<sup>13</sup>C {<sup>1</sup>H} NMR (125 MHz, CDCl<sub>3</sub>) spectrum of Compound 7e

7e 13C

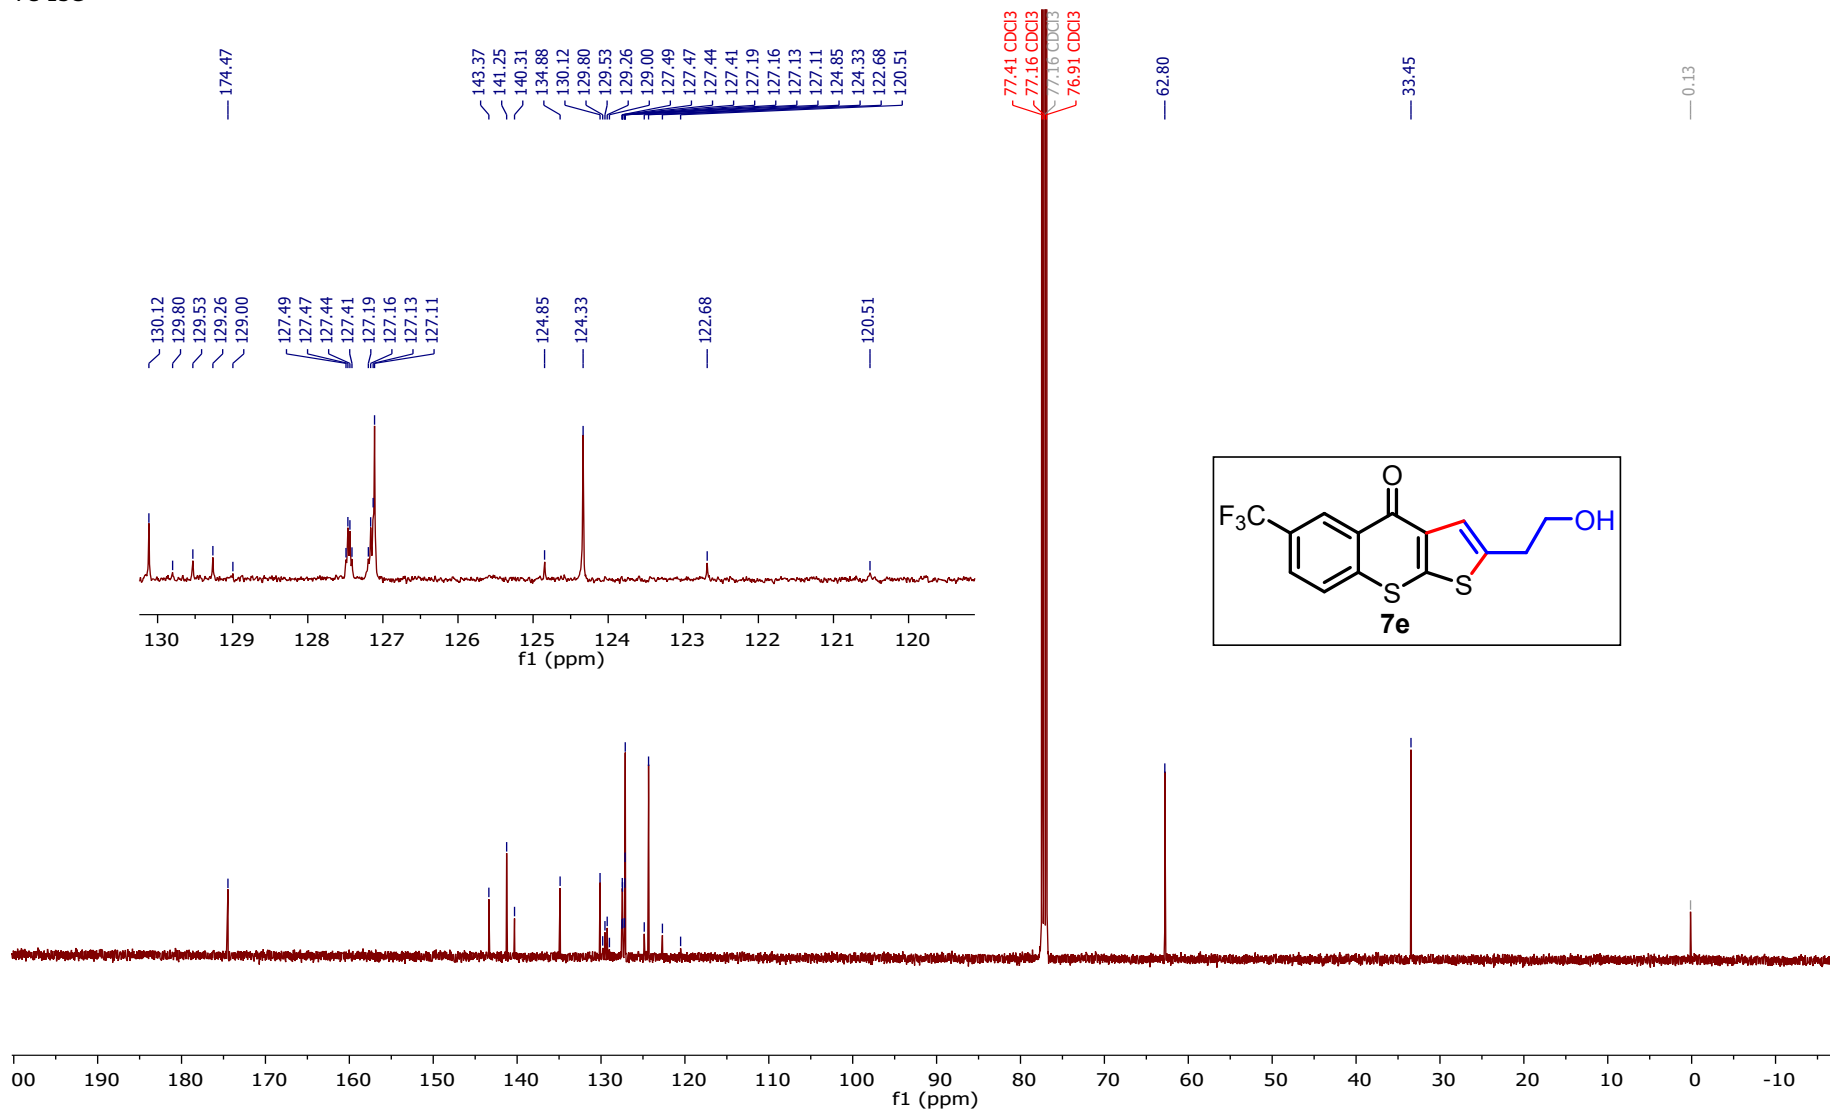

**<sup>19</sup>F NMR**

of

ATK-DF-2-19F.1.fid — ATK-DF-2-19F

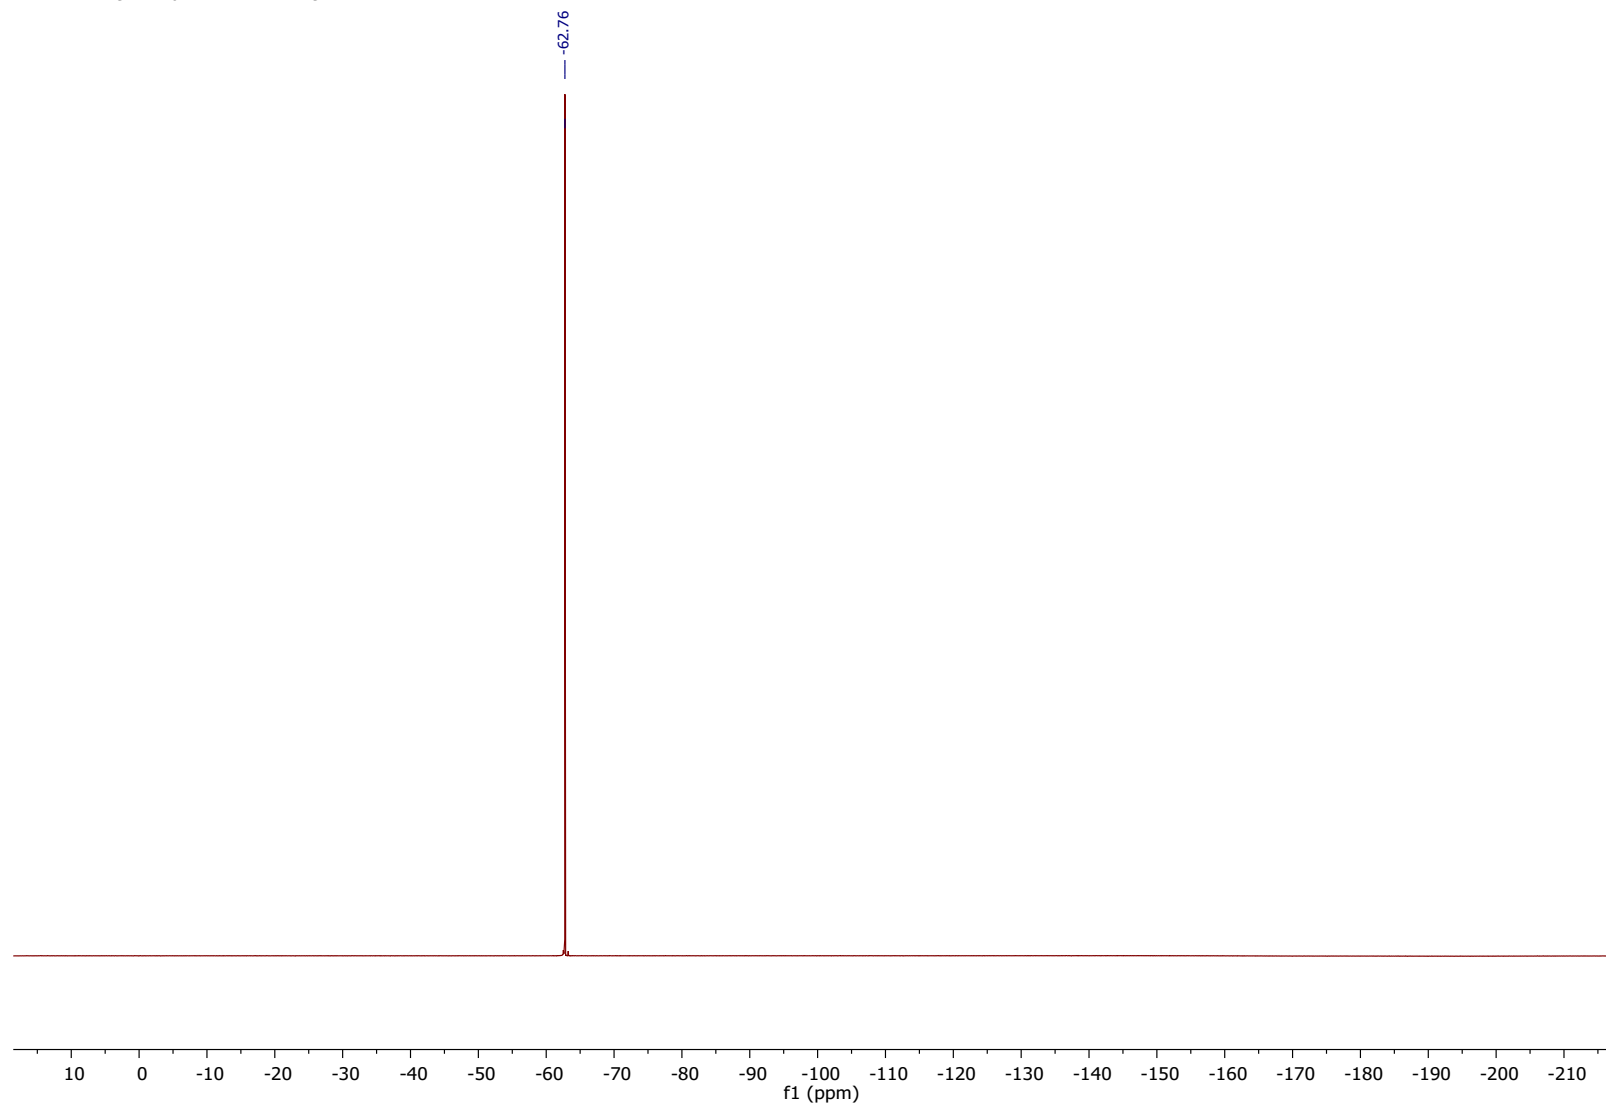

## Compound 7e

## HRMS of compound 7e

**Sample Name**  
**User Name**  
**Sample Type**  
**ACQ Method**

SYSTEM (SYSTEM)  
Sample  
DIRECT MASS\_POSITIVE\_01\_1.m

**Position**  
**Inj Vol**  
**IRM Calibration Status**  
**Comment**

P1-A4  
5  
Success

**Instrument Name**  
**InjPosition**  
**Data Filename**  
**Acquired Time**

QTOF  
DF-F,d  
29-07-2025 14:59:13 (UTC+05:30)

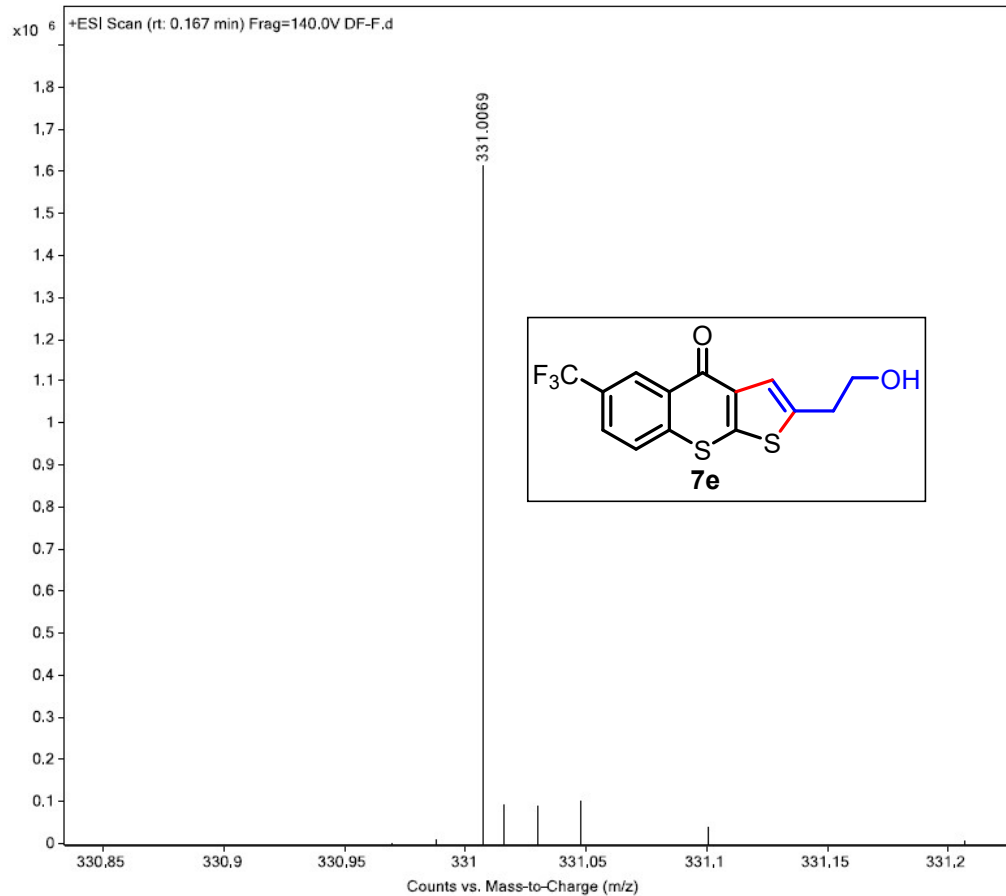

# <sup>1</sup>H NMR (500 MHz, CDCl<sub>3</sub>) spectrum of Compound 7f

7f 1H.1.fid — ATK-DF-G-1H

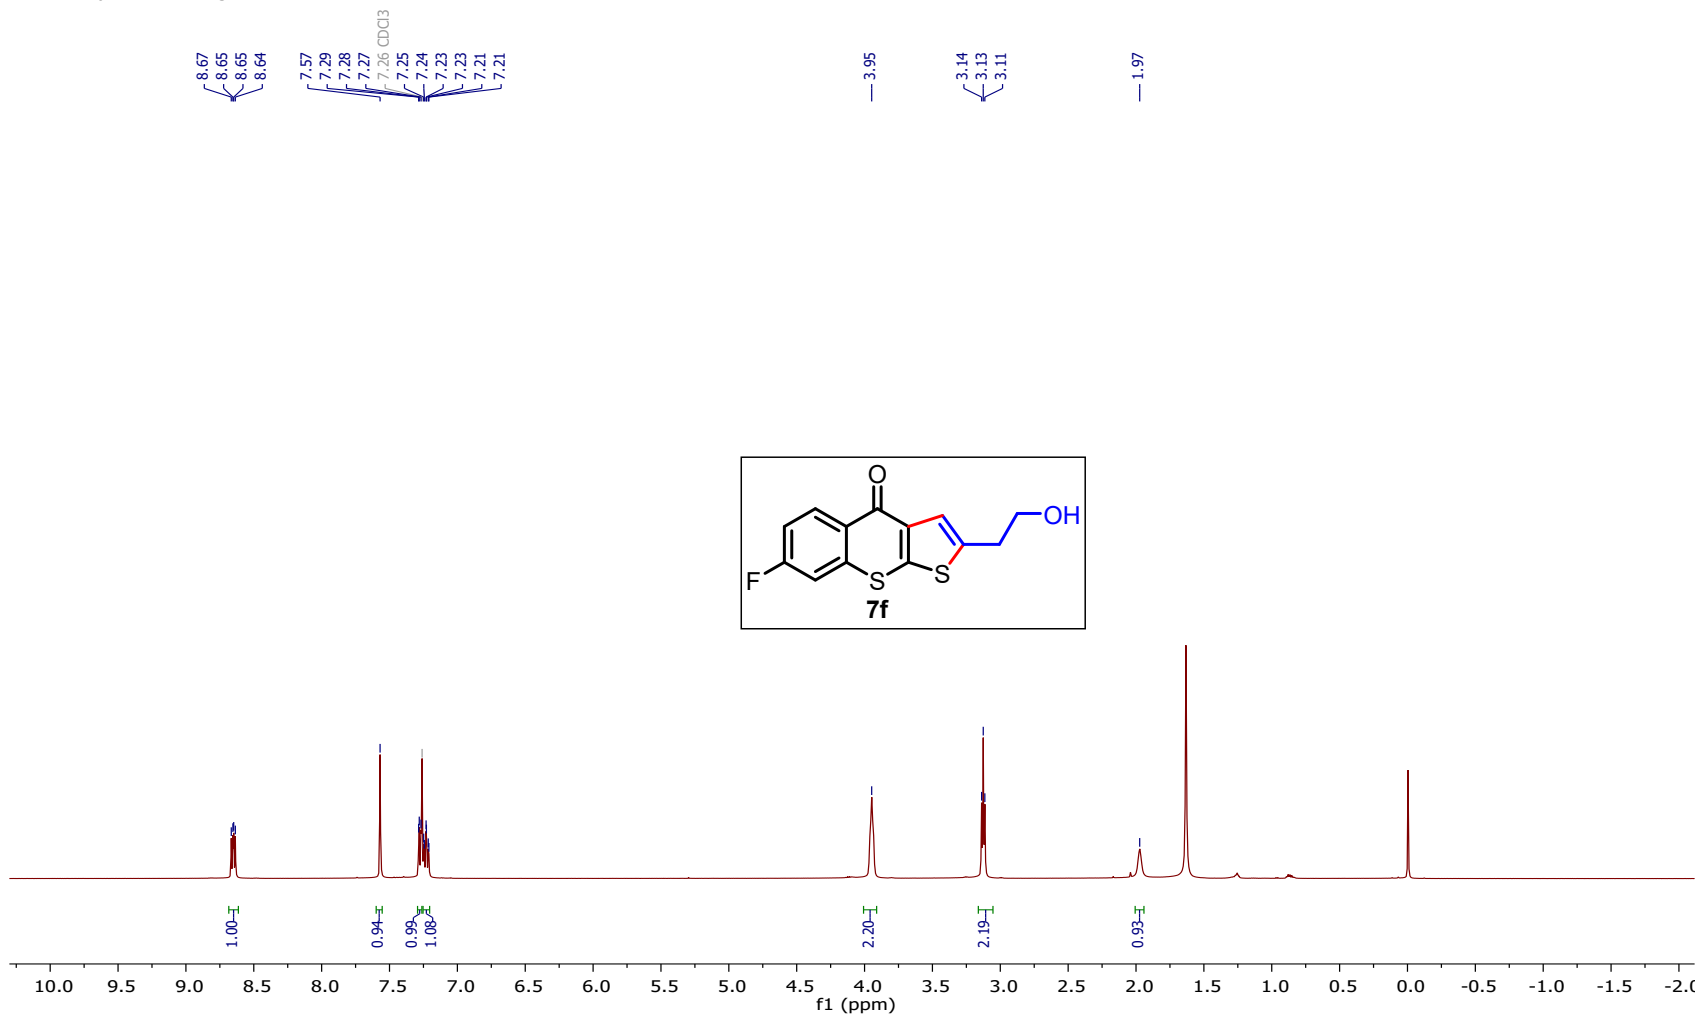

<sup>13</sup>C {<sup>1</sup>H} NMR (125 MHz, CDCl<sub>3</sub>) spectrum of Compound 7f

7f 13C

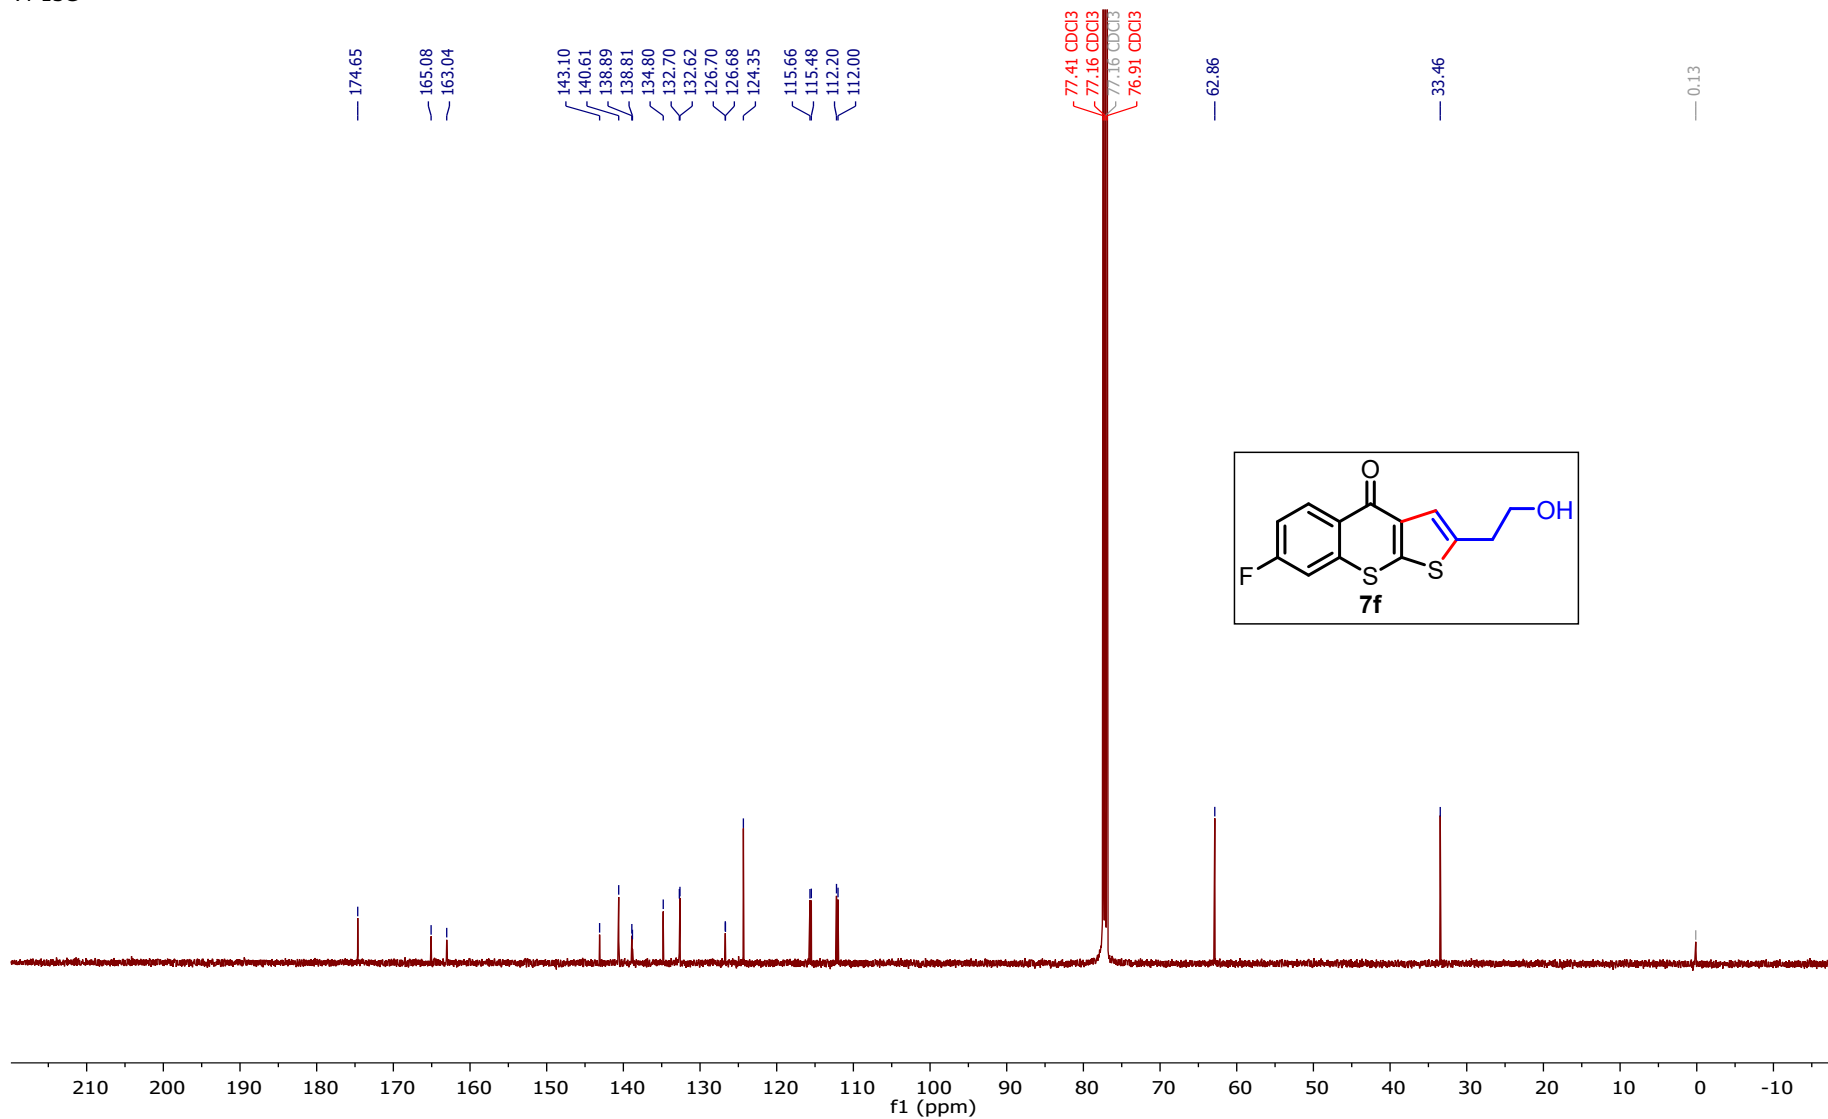

**$^{19}\text{F}$  NMR of Compound 7f**

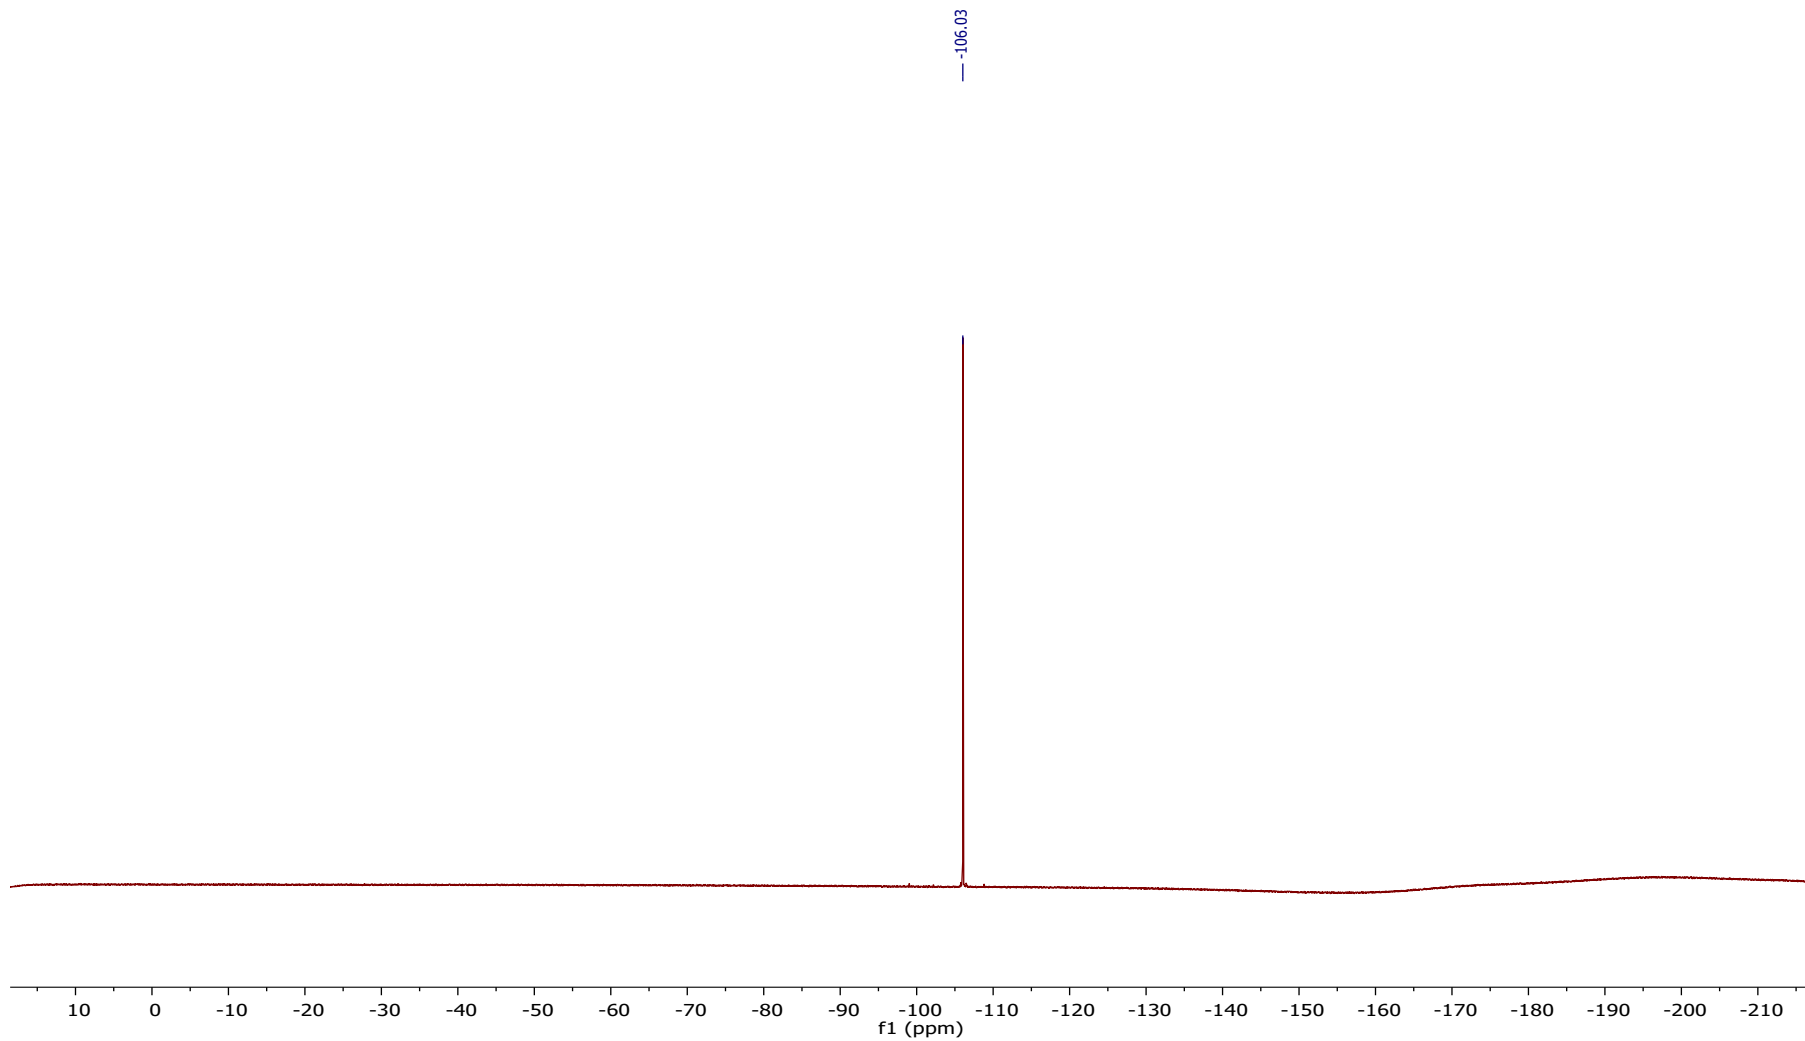

# HRMS of compound 7f

|                    |                                |                               |         |                        |                                 |
|--------------------|--------------------------------|-------------------------------|---------|------------------------|---------------------------------|
| <b>Sample Name</b> | Sample16                       | <b>Position</b>               | P1-B5   | <b>Instrument Name</b> | QTOF                            |
| <b>User Name</b>   | SYSTEM (SYSTEM)                | <b>Inj Vol</b>                | 5       | <b>InjPosition</b>     |                                 |
| <b>Sample Type</b> | Sample                         | <b>IRM Calibration Status</b> | Success | <b>Data Filename</b>   | DF-G,d                          |
| <b>ACQ Method</b>  | DIRECT MASS_POSITIVE_01_1500.m | <b>Comment</b>                |         | <b>Acquired Time</b>   | 11-09-2025 17:09:47 (UTC+05:30) |

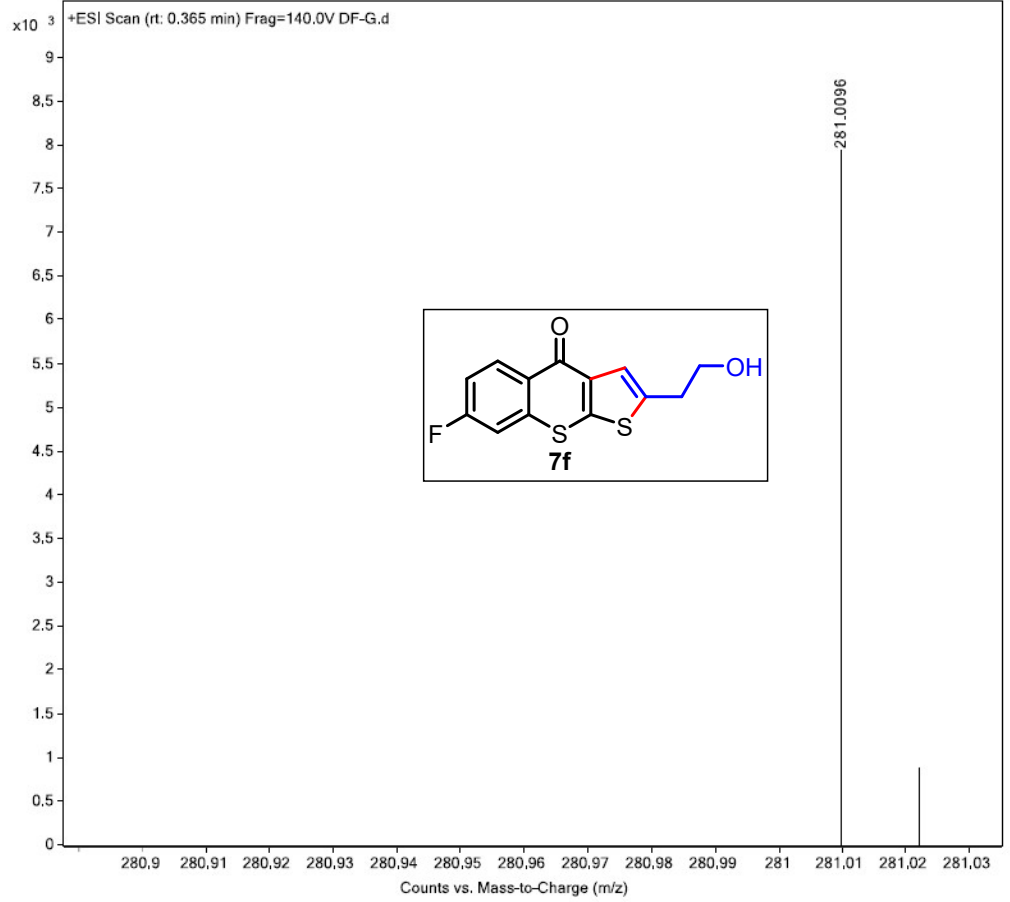

# <sup>1</sup>H NMR (400 MHz, CDCl<sub>3</sub>) spectrum of Compound 8a

ATK-DK-AC-01-1H.1.fid — ATK-DK-AC-01-1H

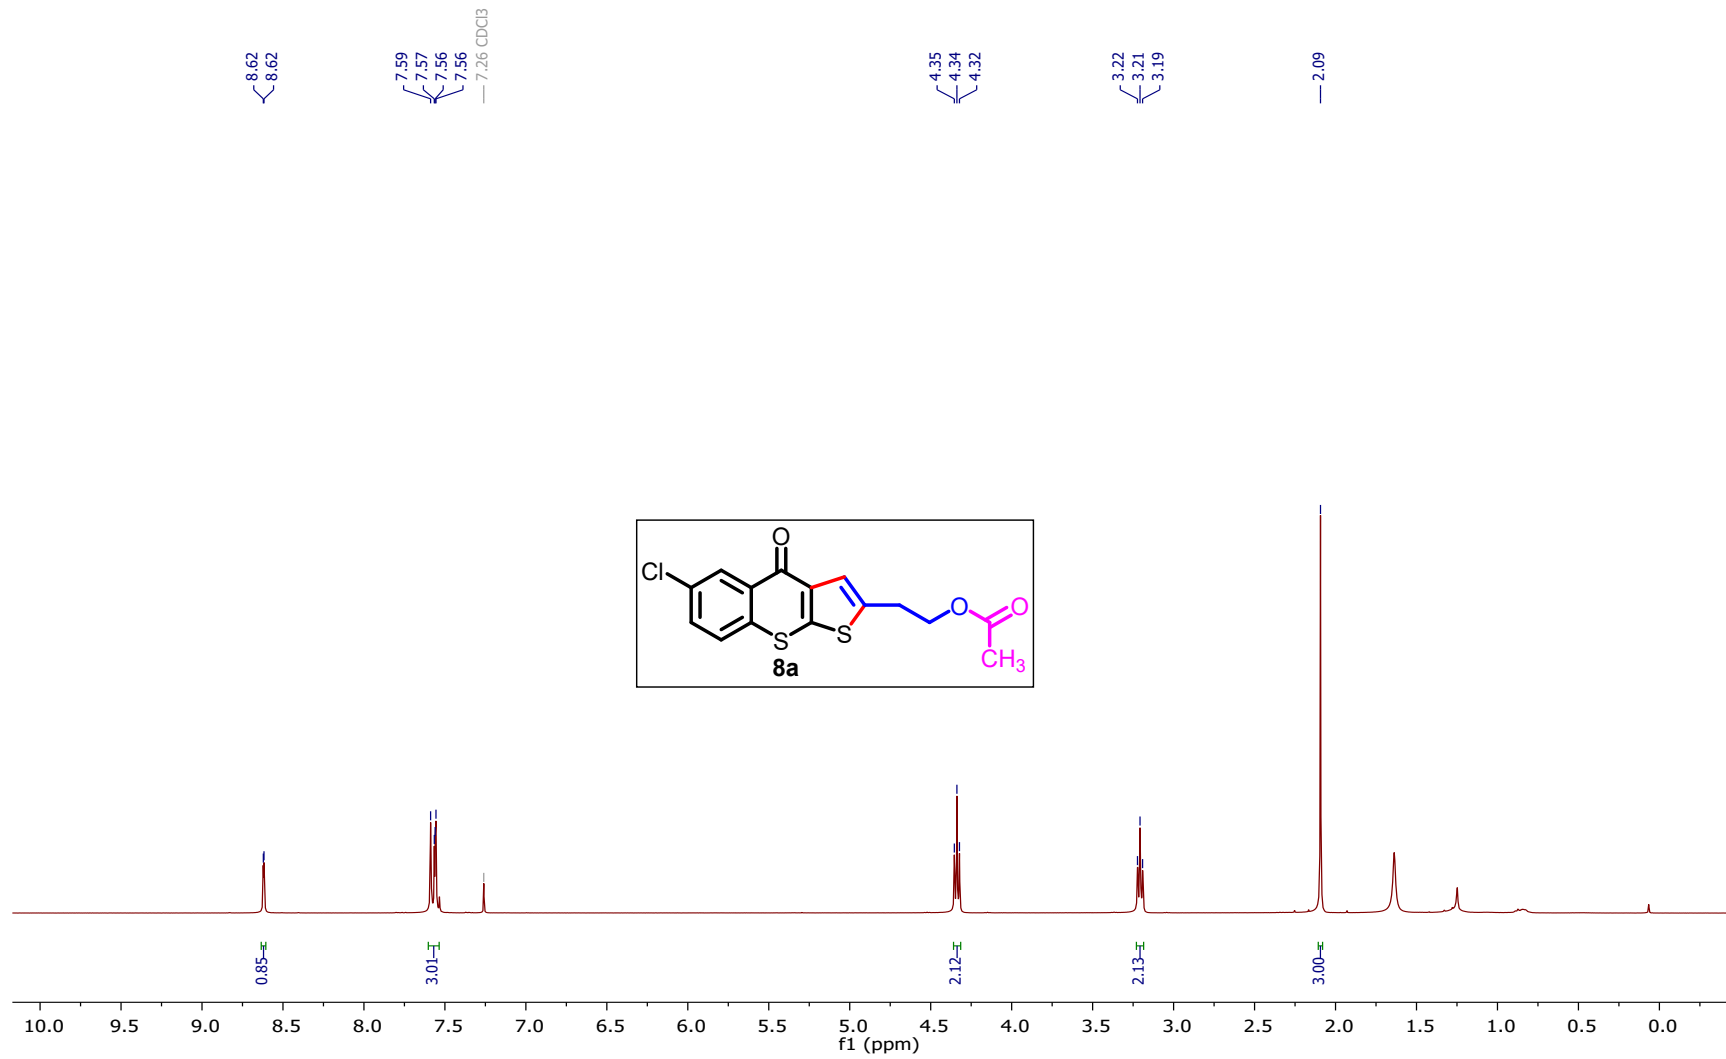

$^{13}\text{C}$   $\{^1\text{H}\}$  NMR (125 MHz,  $\text{CDCl}_3$ ) spectrum of Compound 8a

8a 13C

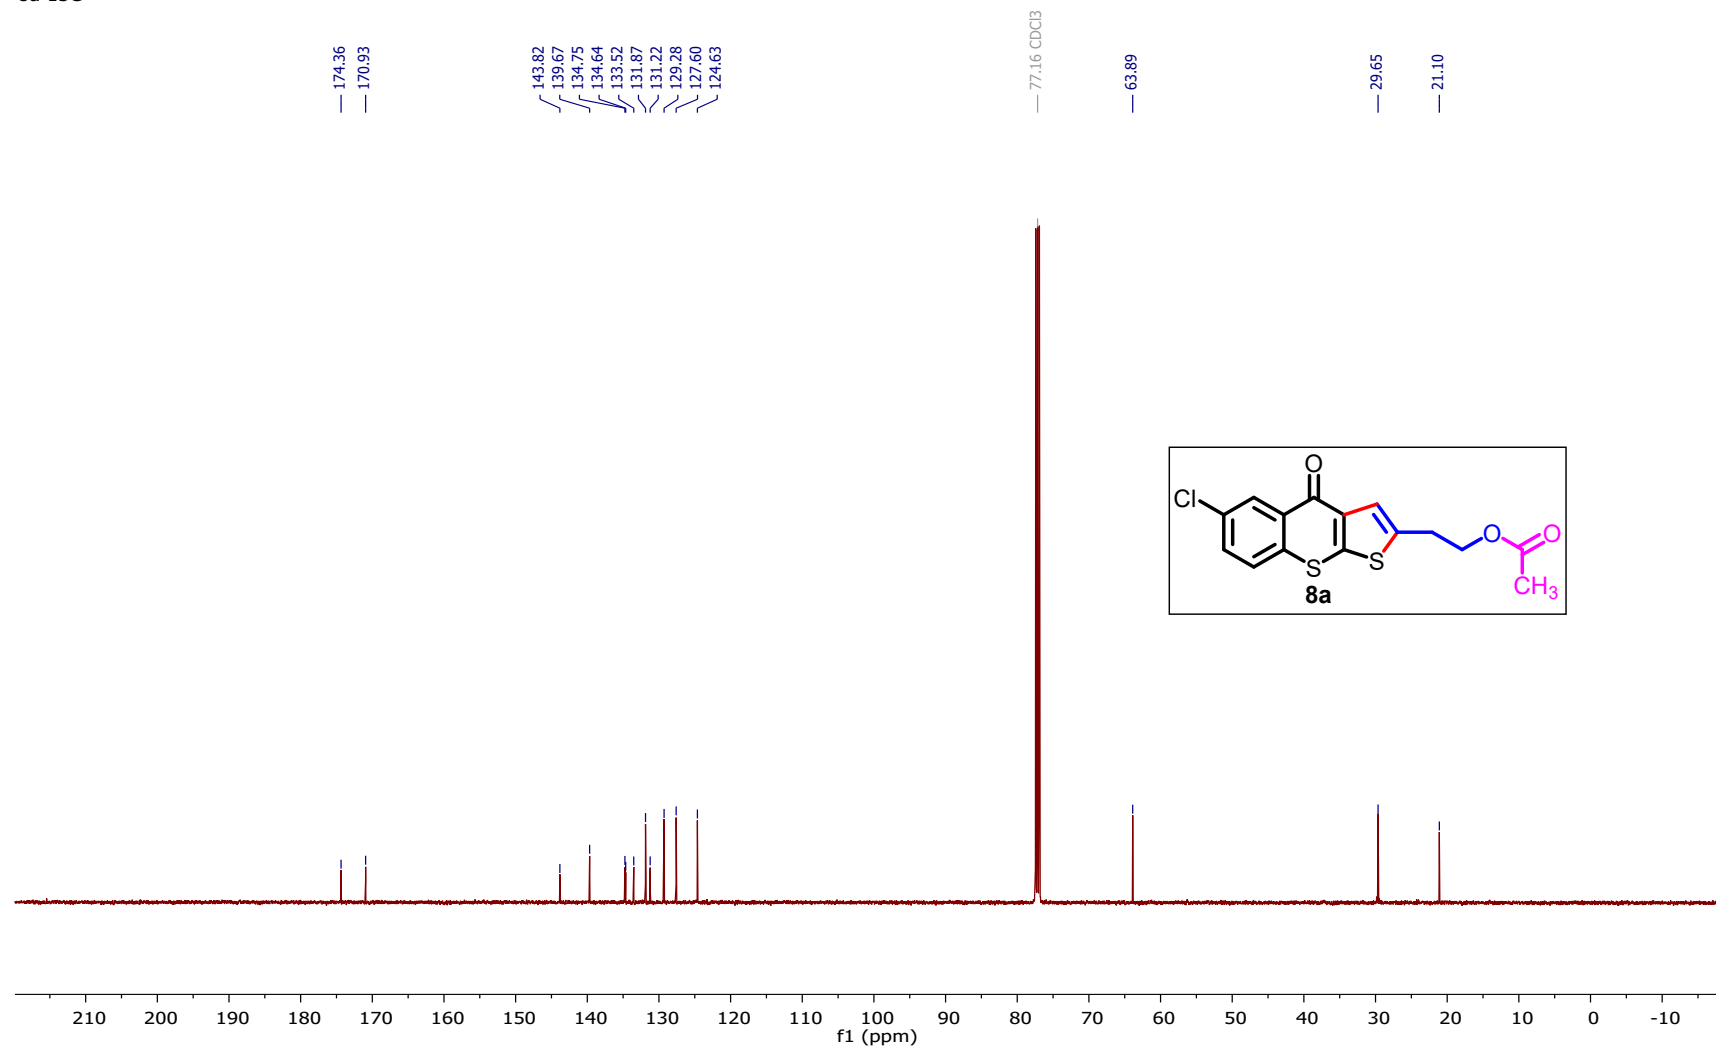

## HRMS of compound 8a

|                    |                                |                               |         |                        |                                 |
|--------------------|--------------------------------|-------------------------------|---------|------------------------|---------------------------------|
| <b>Sample Name</b> | Sample12                       | <b>Position</b>               | P1-B1   | <b>Instrument Name</b> | QTOF                            |
| <b>User Name</b>   | SYSTEM (SYSTEM)                | <b>Inj Vol</b>                | 5       | <b>InjPosition</b>     |                                 |
| <b>Sample Type</b> | Sample                         | <b>IRM Calibration Status</b> | Success | <b>Data Filename</b>   | AC2,d                           |
| <b>ACQ Method</b>  | DIRECT MASS_POSITIVE_50_3200,m | <b>Comment</b>                |         | <b>Acquired Time</b>   | 11-07-2025 15:07:20 (UTC+05:30) |

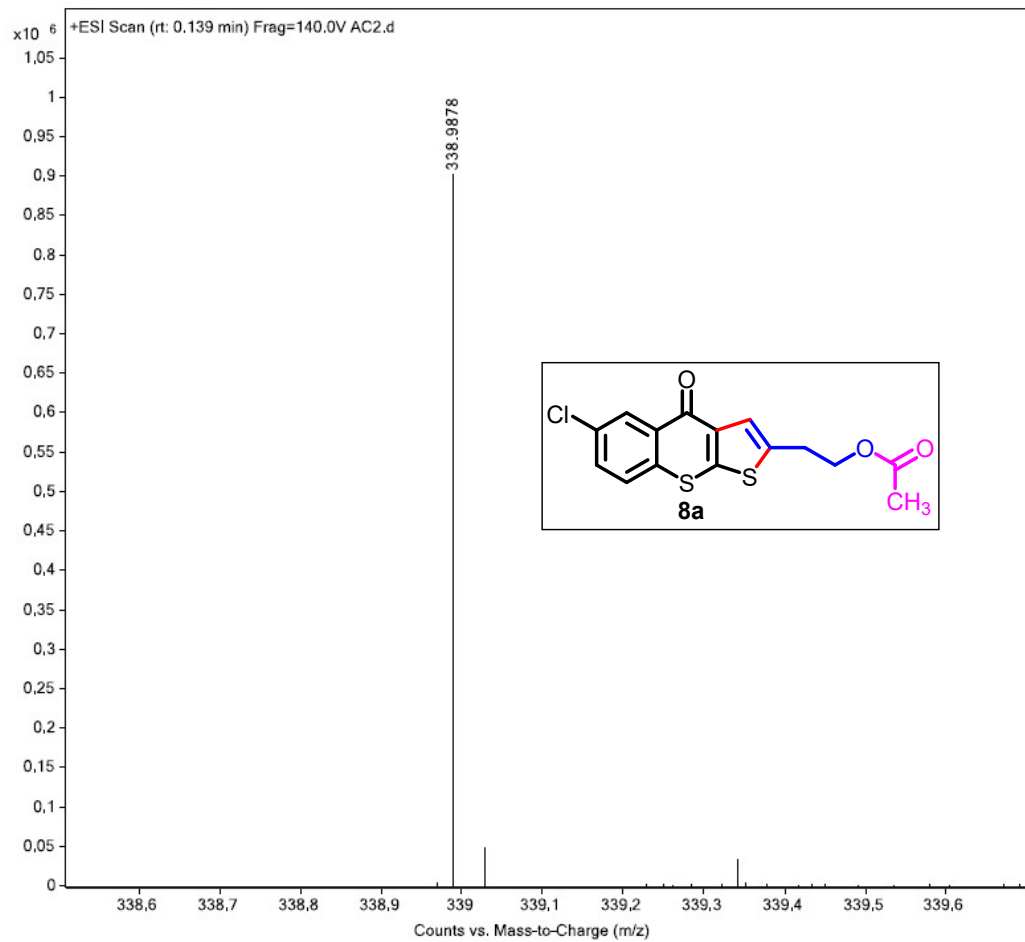

<sup>1</sup>H NMR (400 MHz, CDCl<sub>3</sub>) spectrum of Compound 10a

10a 1H

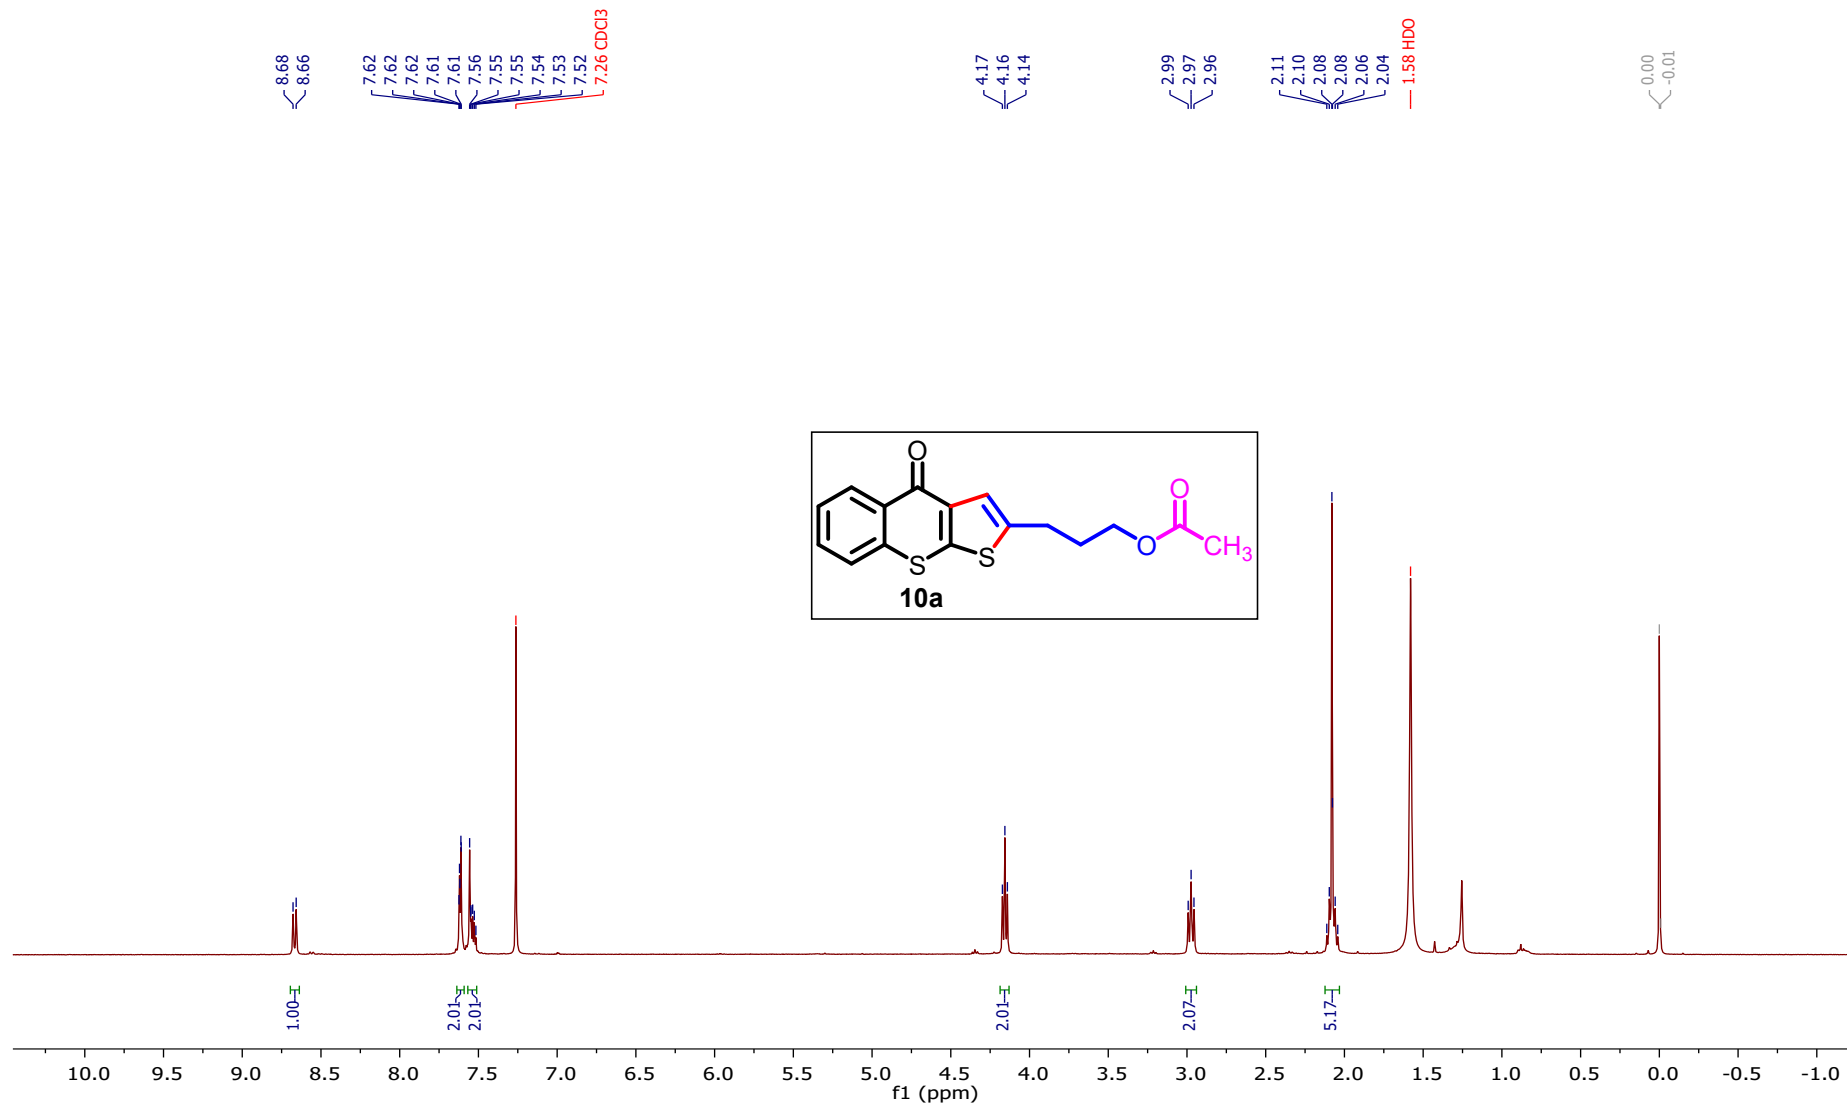

$^{13}\text{C}$  { $^1\text{H}$ } NMR (125 MHz,  $\text{CDCl}_3$ ) spectrum of Compound 10a

10a 13C

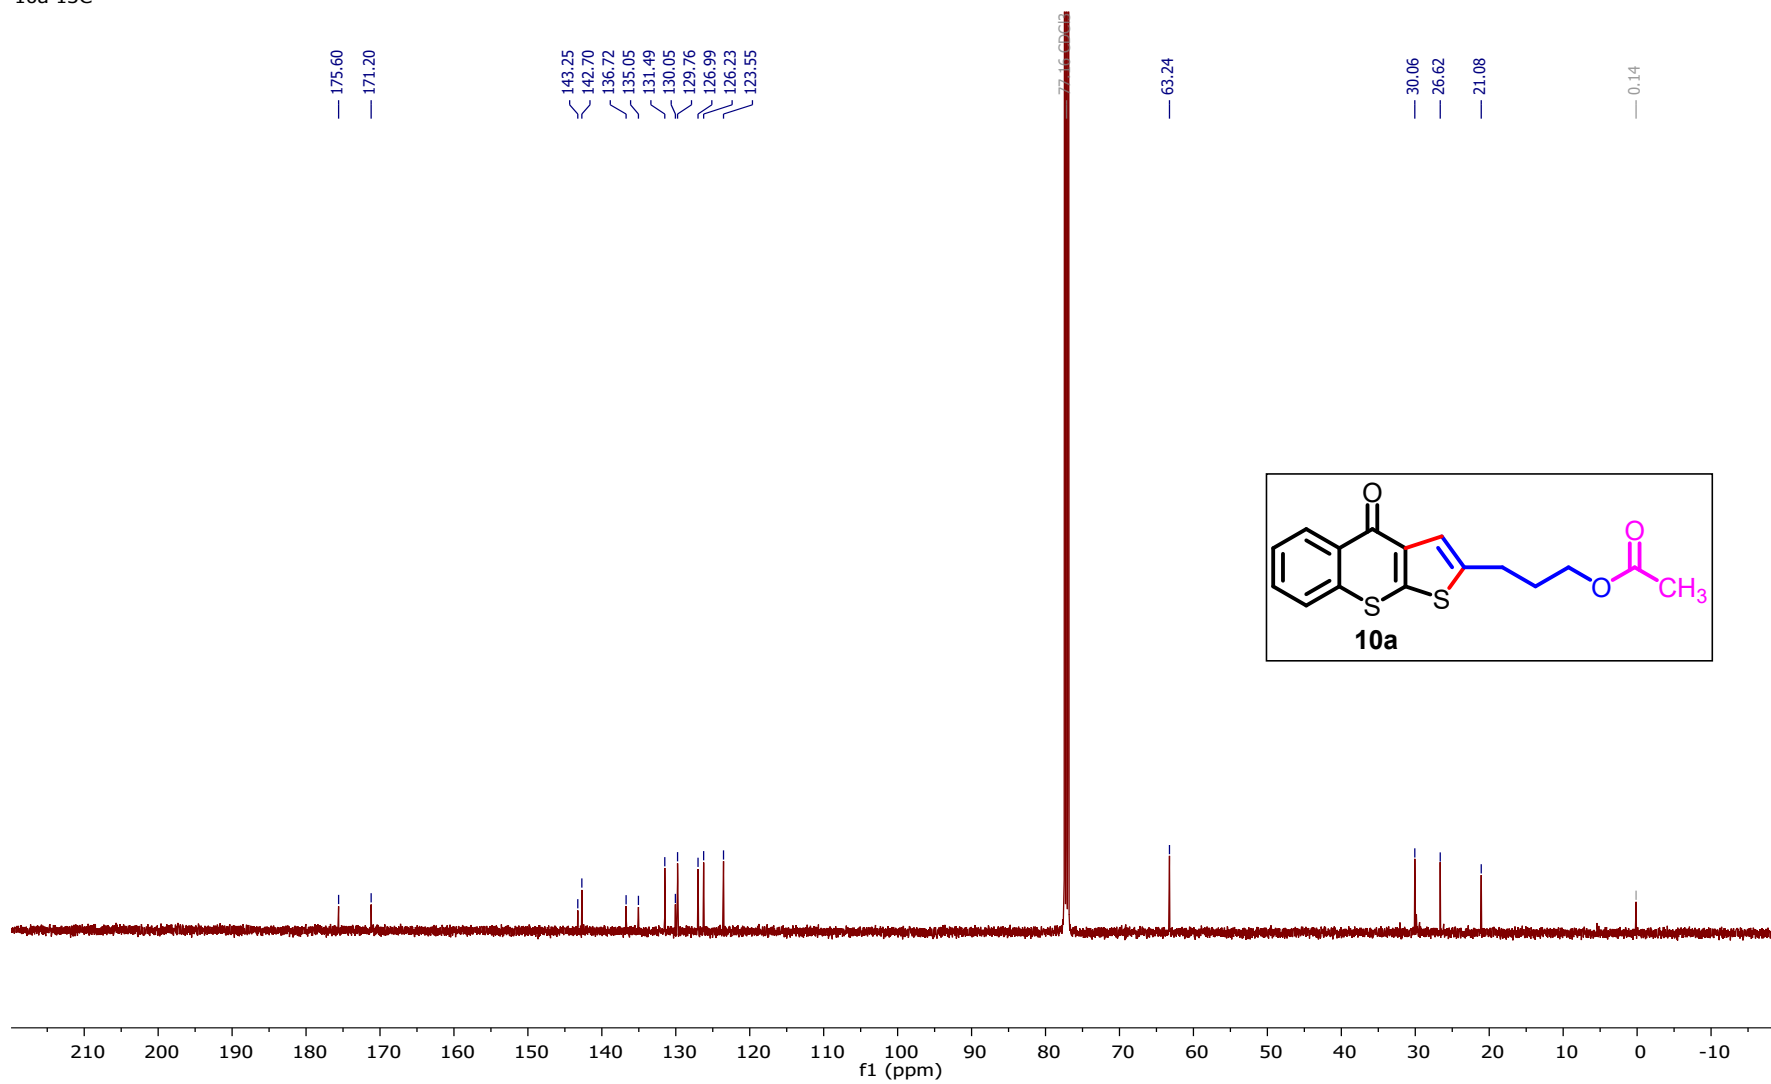

# HRMS of compound 10a

|                    |                                |                               |         |                        |                                 |
|--------------------|--------------------------------|-------------------------------|---------|------------------------|---------------------------------|
| <b>Sample Name</b> | Sample34                       | <b>Position</b>               | P1-D1   | <b>Instrument Name</b> | QTOF                            |
| <b>User Name</b>   | SYSTEM (SYSTEM)                | <b>Inj Vol</b>                | 5       | <b>InjPosition</b>     |                                 |
| <b>Sample Type</b> | Sample                         | <b>IRM Calibration Status</b> | Success | <b>Data Filename</b>   | TC-ACI,d                        |
| <b>ACQ Method</b>  | DIRECT MASS_POSITIVE_50_1500.m | <b>Comment</b>                |         | <b>Acquired Time</b>   | 15-09-2025 11:21:55 (UTC+05:30) |

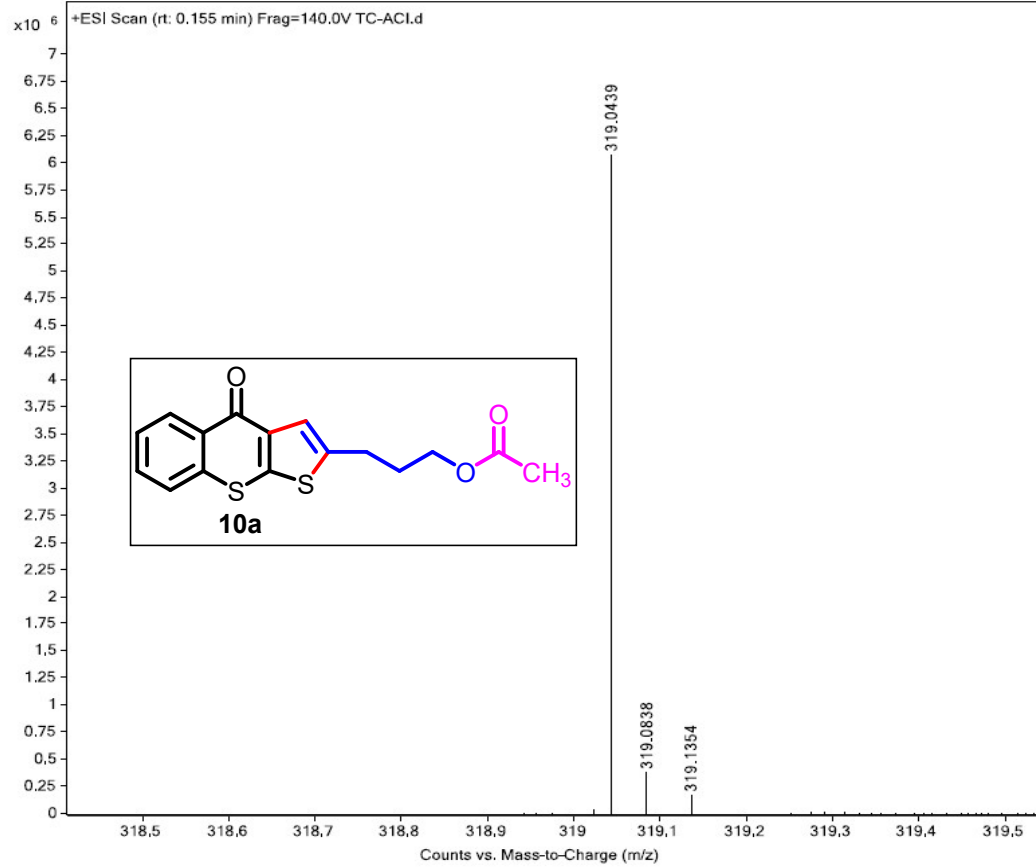

<sup>1</sup>H NMR (500 MHz, CDCl<sub>3</sub>) spectrum of Compound 10b

10b 1H

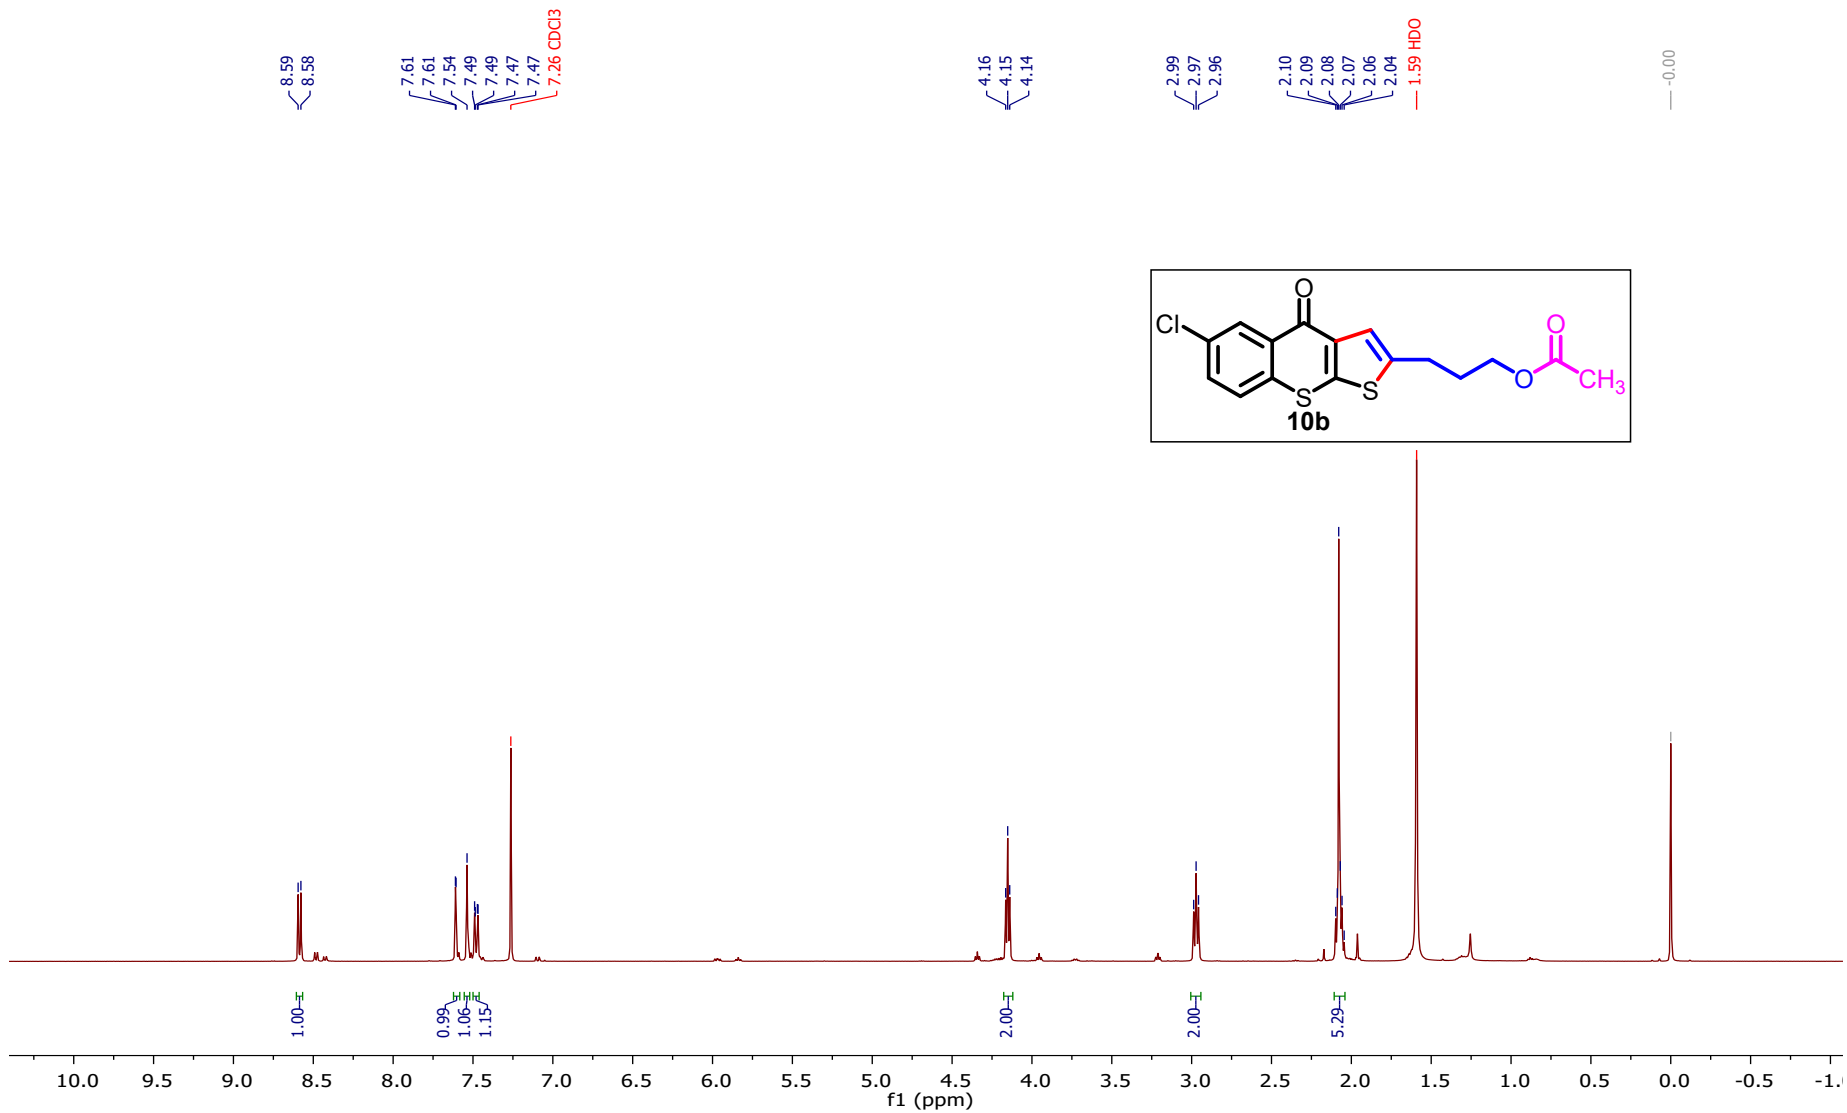

<sup>13</sup>C {<sup>1</sup>H} NMR (125 MHz, CDCl<sub>3</sub>) spectrum of Compound 10b

10b 13C

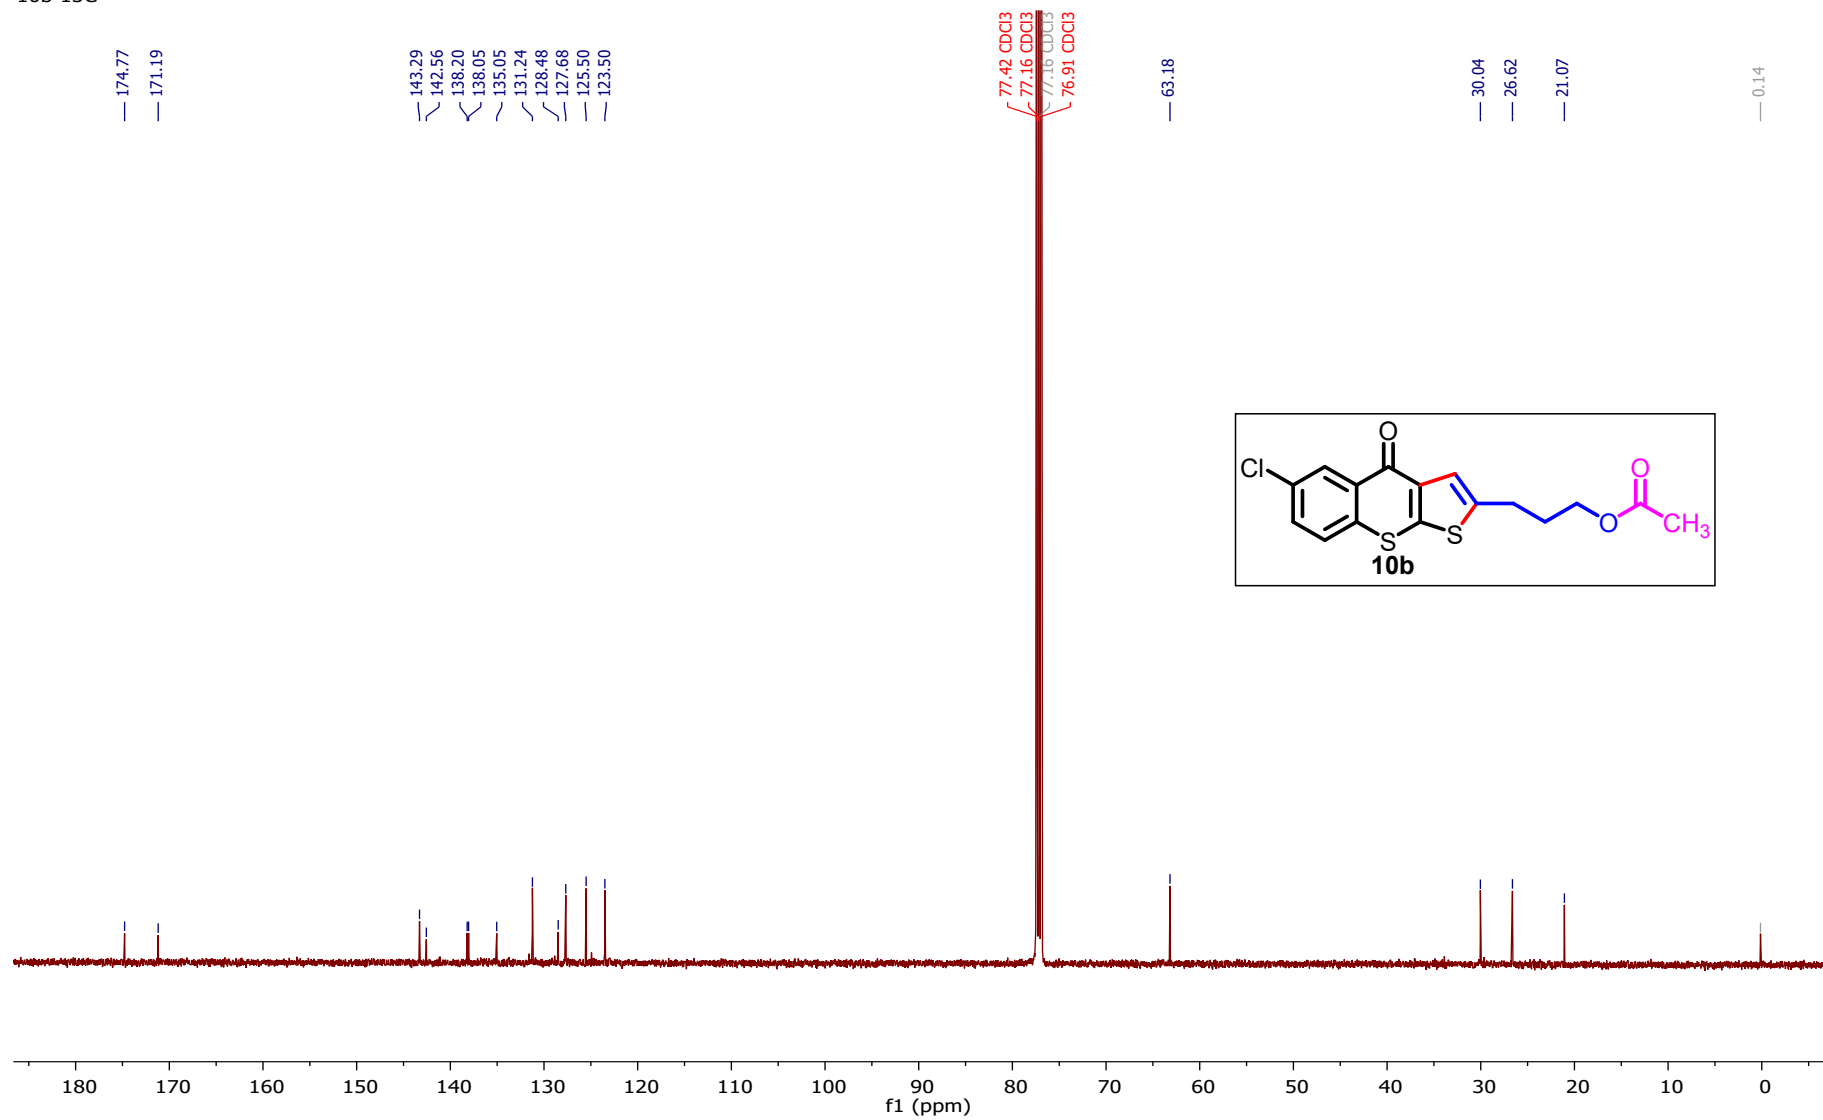

# HRMS of compound 10b

|                    |                             |                               |         |                        |                                 |
|--------------------|-----------------------------|-------------------------------|---------|------------------------|---------------------------------|
| <b>Sample Name</b> | Sample29                    | <b>Position</b>               | P1-C7   | <b>Instrument Name</b> | QTOF                            |
| <b>User Name</b>   | SYSTEM (SYSTEM)             | <b>Inj Vol</b>                | 5       | <b>InjPosition</b>     |                                 |
| <b>Sample Type</b> | Sample                      | <b>IRM Calibration Status</b> | Success | <b>Data Filename</b>   | DHP-1,d                         |
| <b>ACQ Method</b>  | DIRECT MASS_POSITIVE_01_1.m | <b>Comment</b>                |         | <b>Acquired Time</b>   | 11-09-2025 12:19:34 (UTC+05:30) |

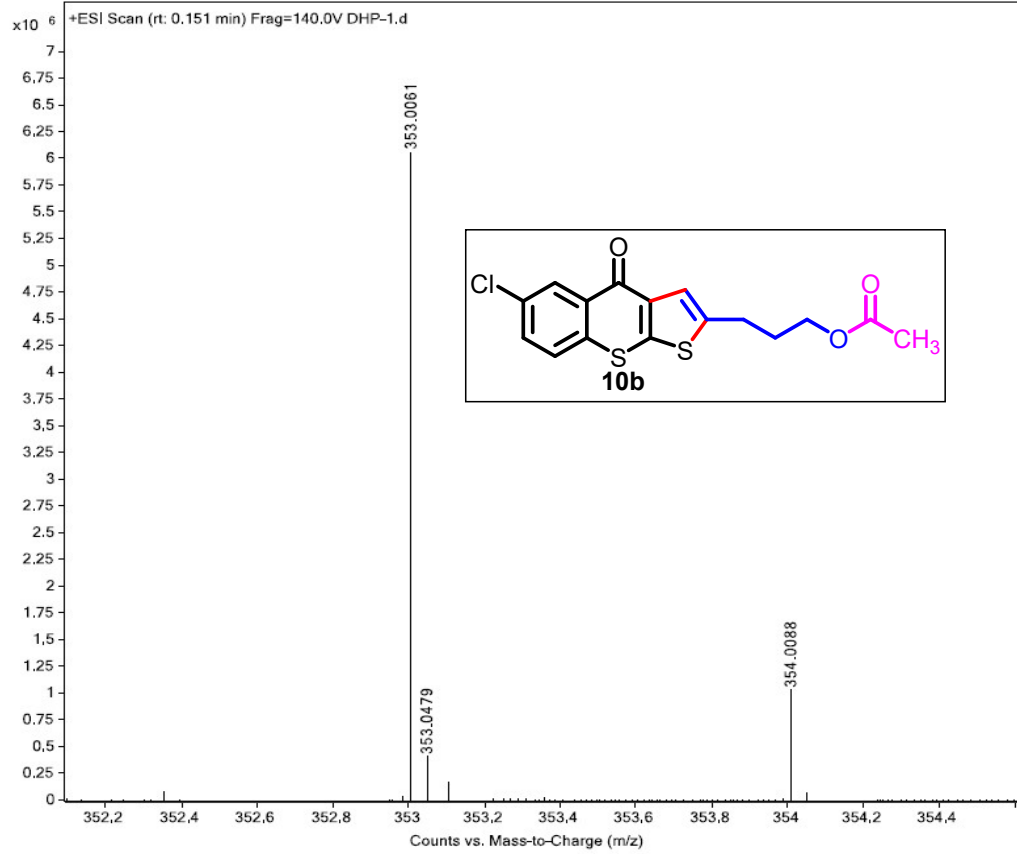

# <sup>1</sup>H NMR (500 MHz, CDCl<sub>3</sub>) spectrum of Compound 10c

10c 1H

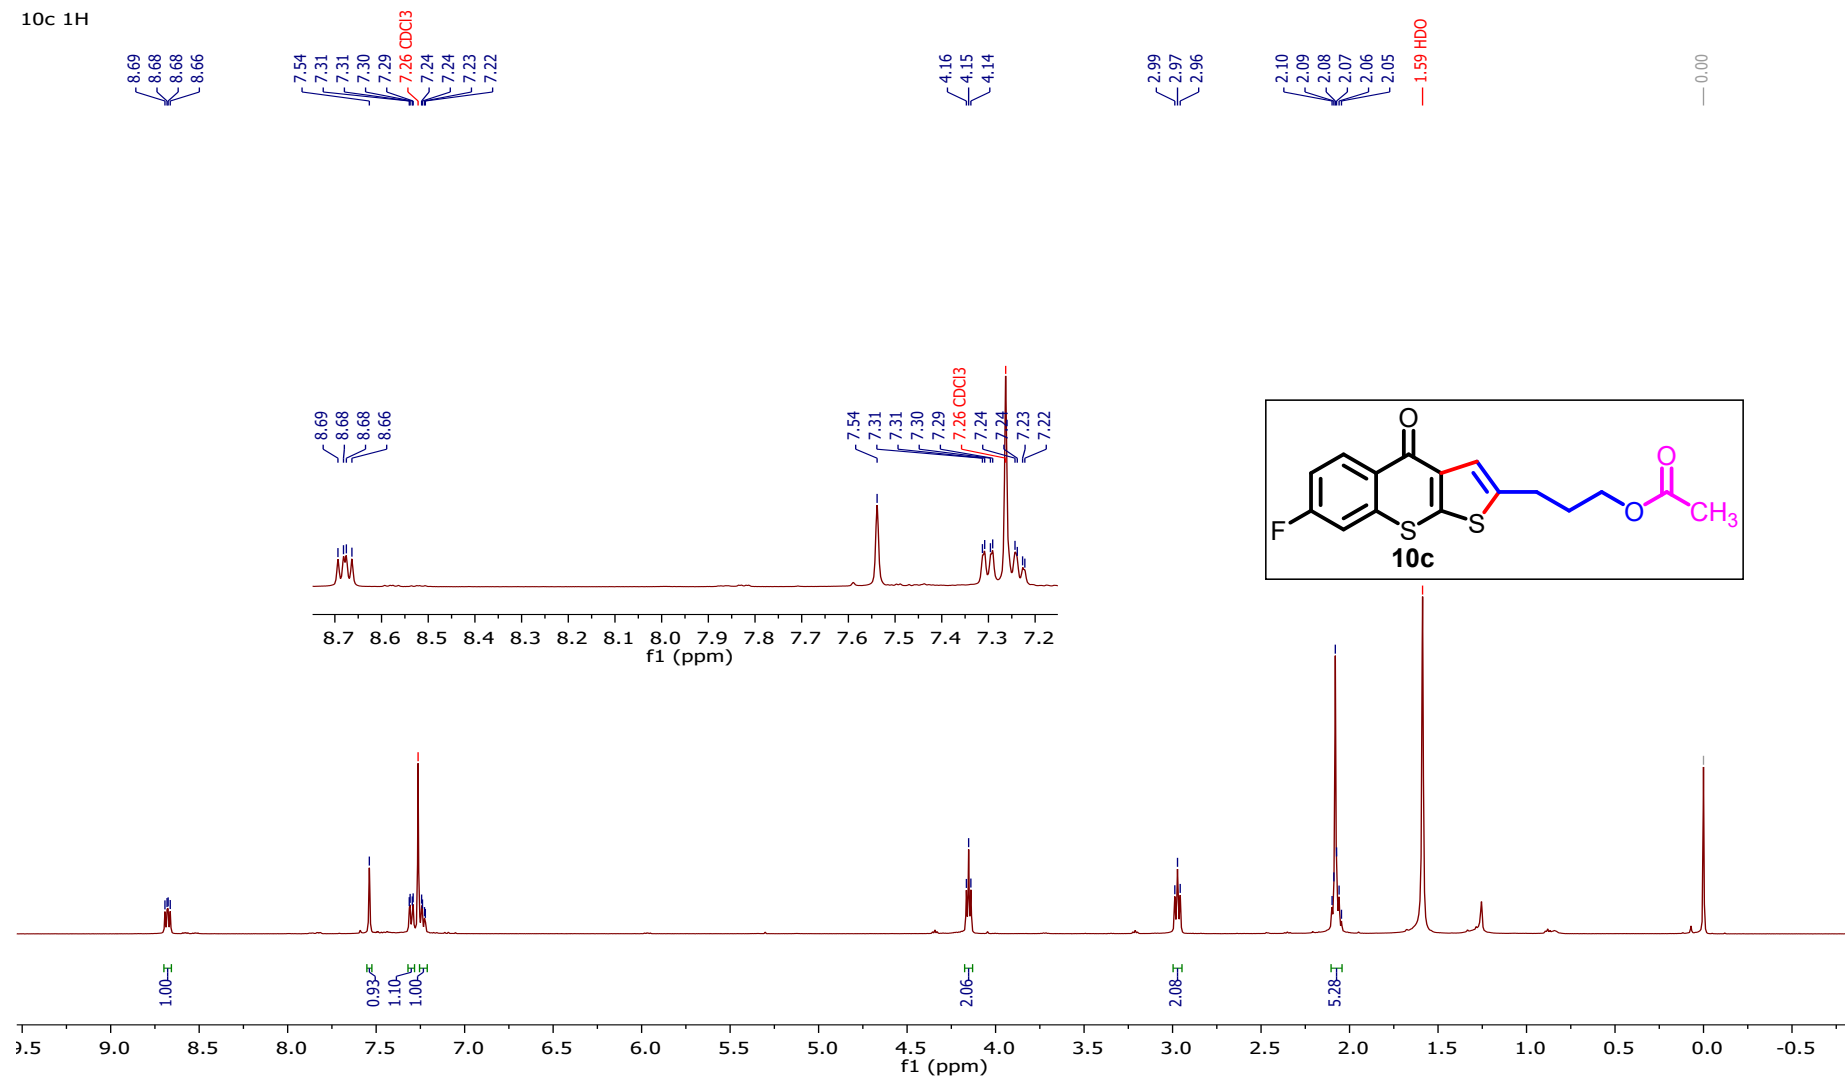

**$^{13}\text{C}$  { $^1\text{H}$ } NMR (125 MHz,  $\text{CDCl}_3$ ) spectrum of Compound 10c**

10c 13C

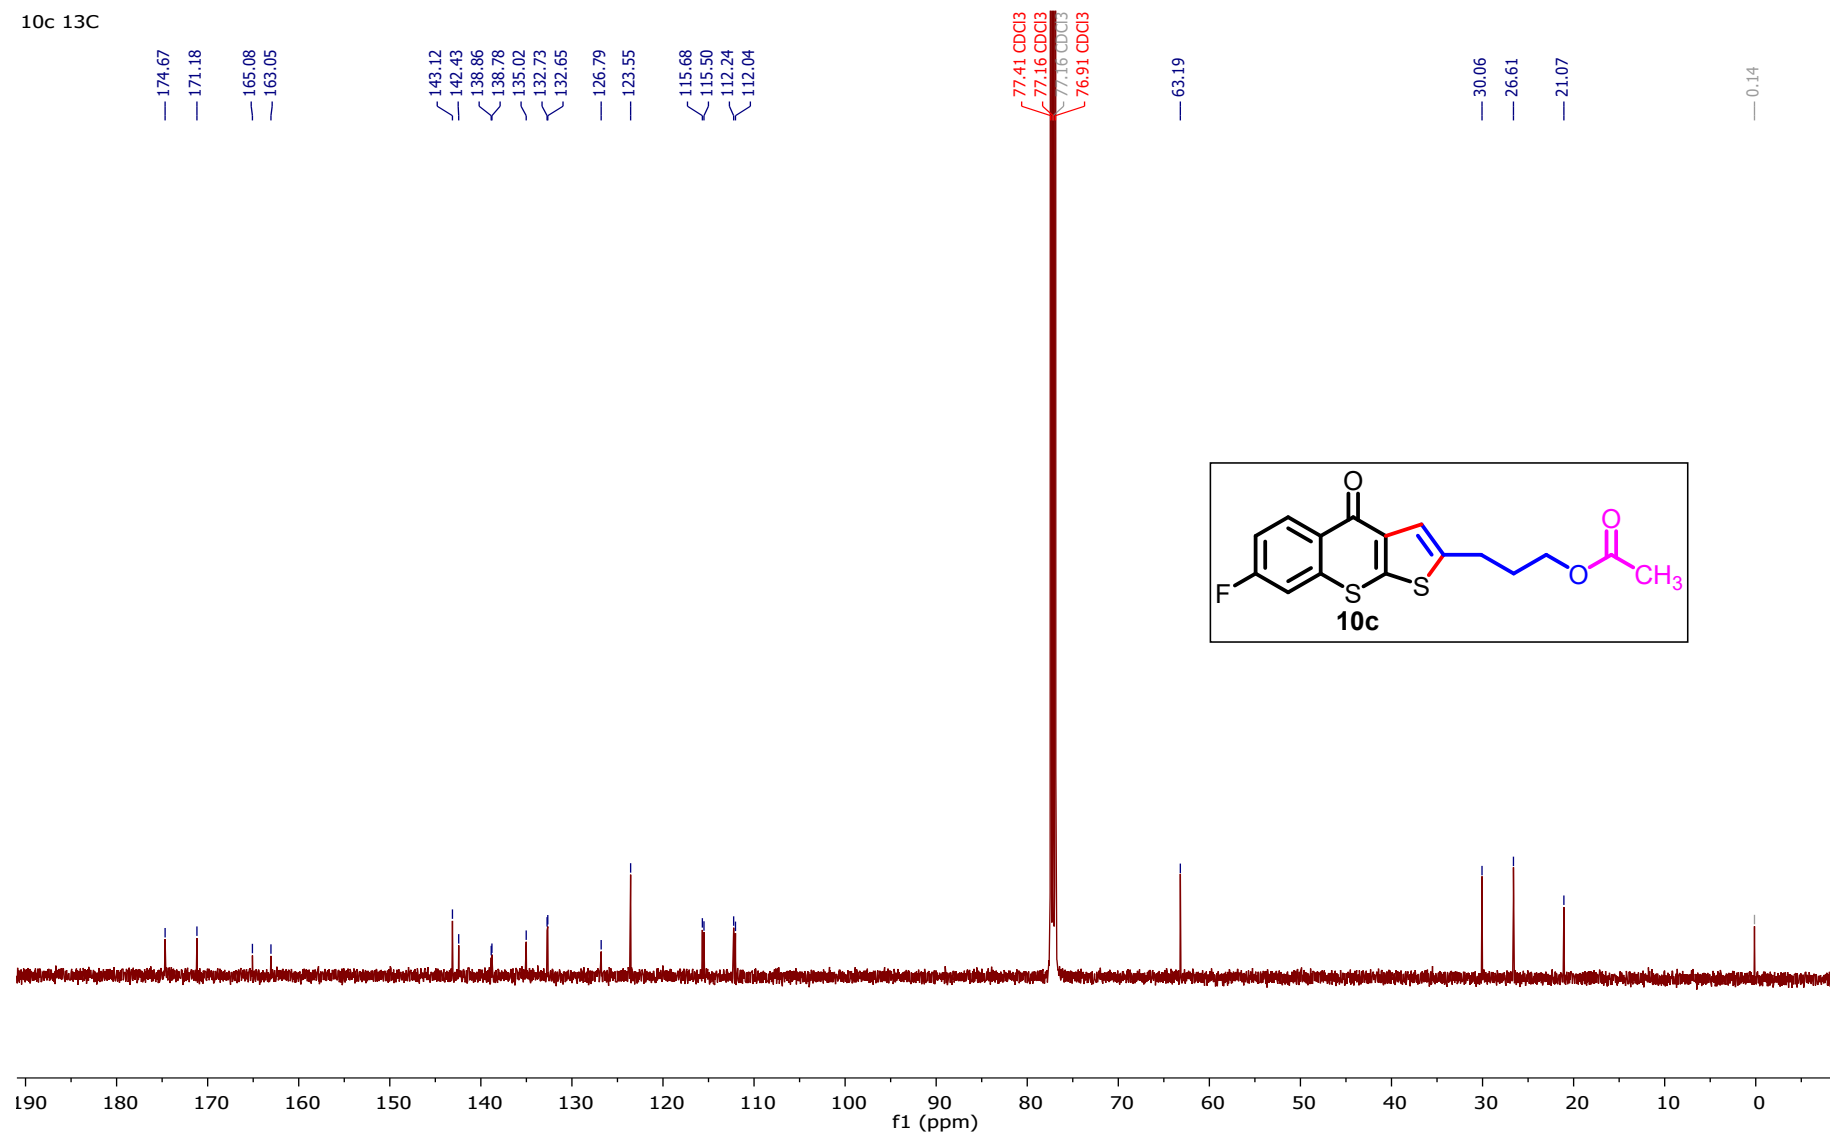

# <sup>19</sup>F of Compound 10c

ATK-DHP-AC-19F.3.fid — ATK-DHP-AC-19F

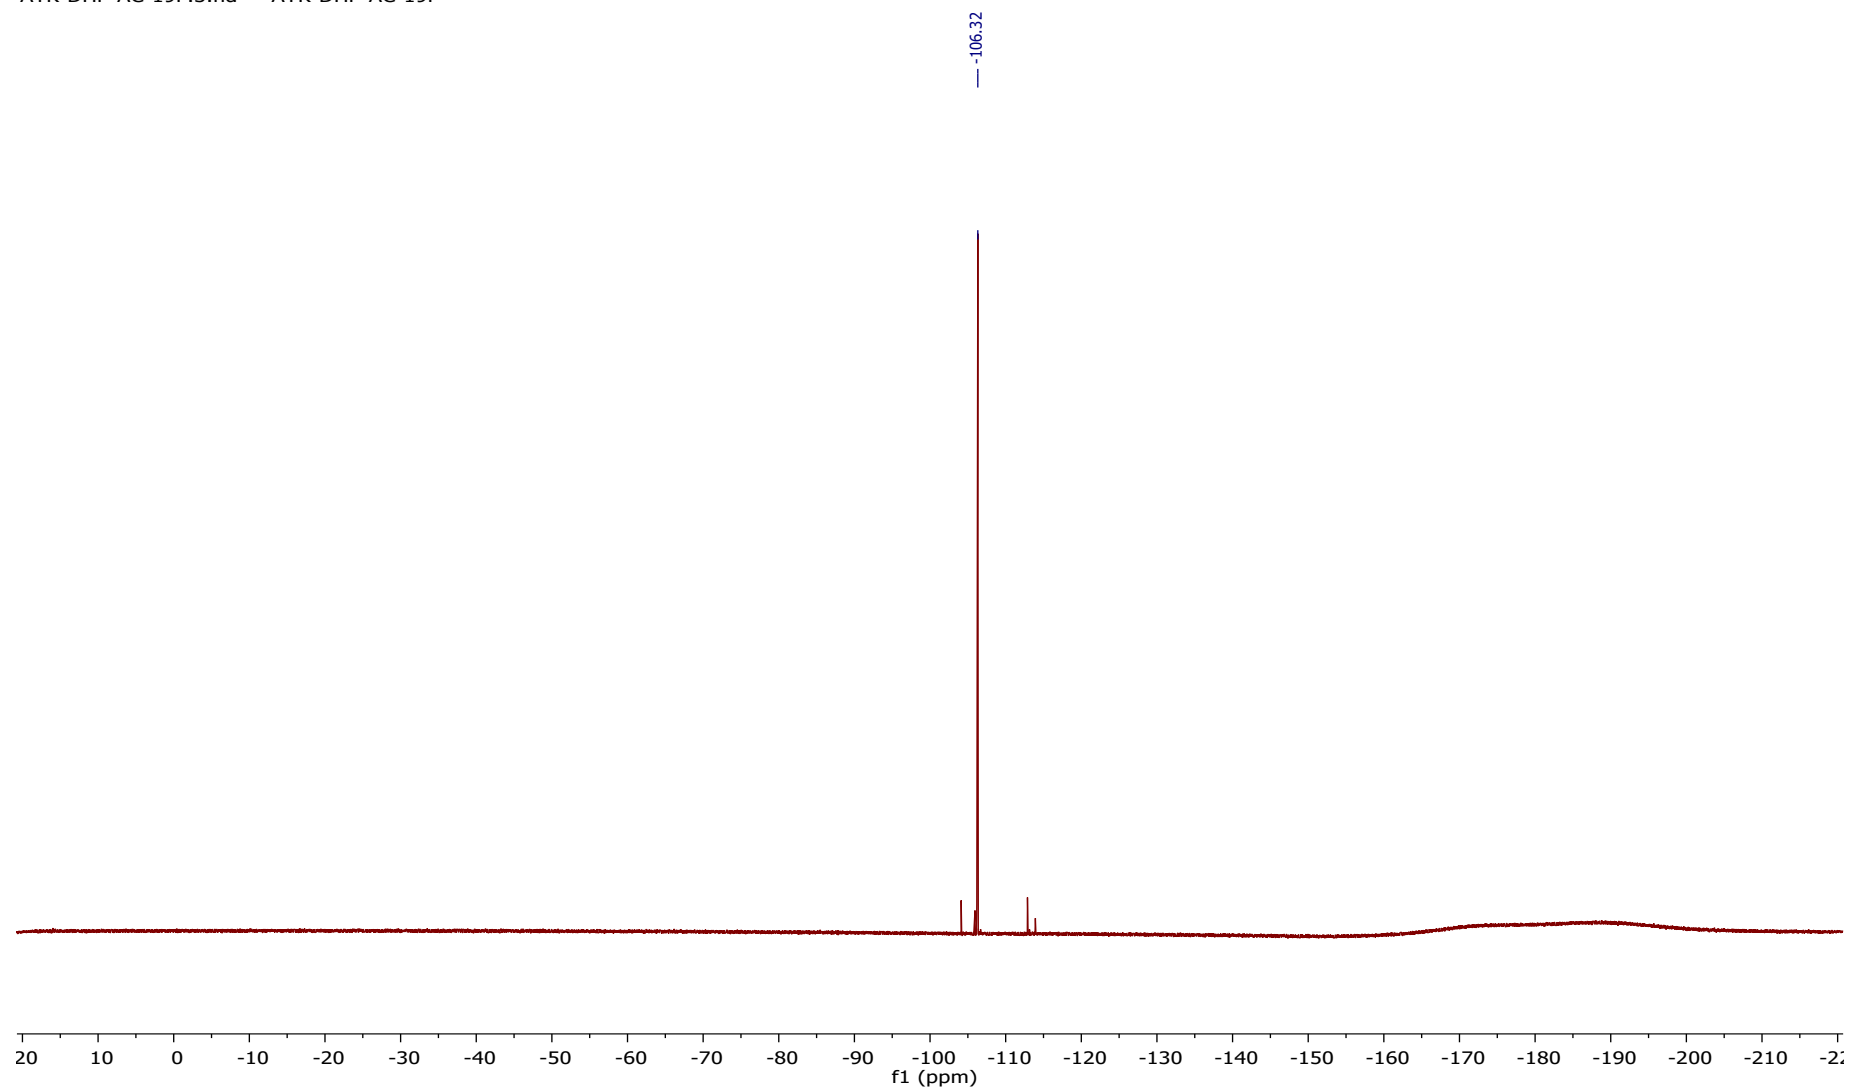

DEP  
T-  
135  
<sup>13</sup>C  
{<sup>1</sup>H}  
NM  
R  
(125  
MHz  
,  
CDC  
l<sub>3</sub>)  
spec  
tru  
m of  
Com  
pou  
nd  
10c

10c DEPT-135

132.59

123.41

115.54

115.37

112.11

111.90

63.05

29.91

26.47

20.95

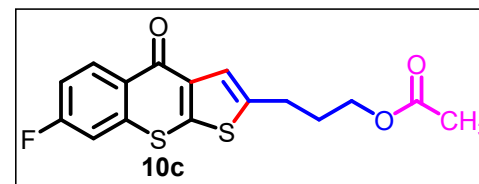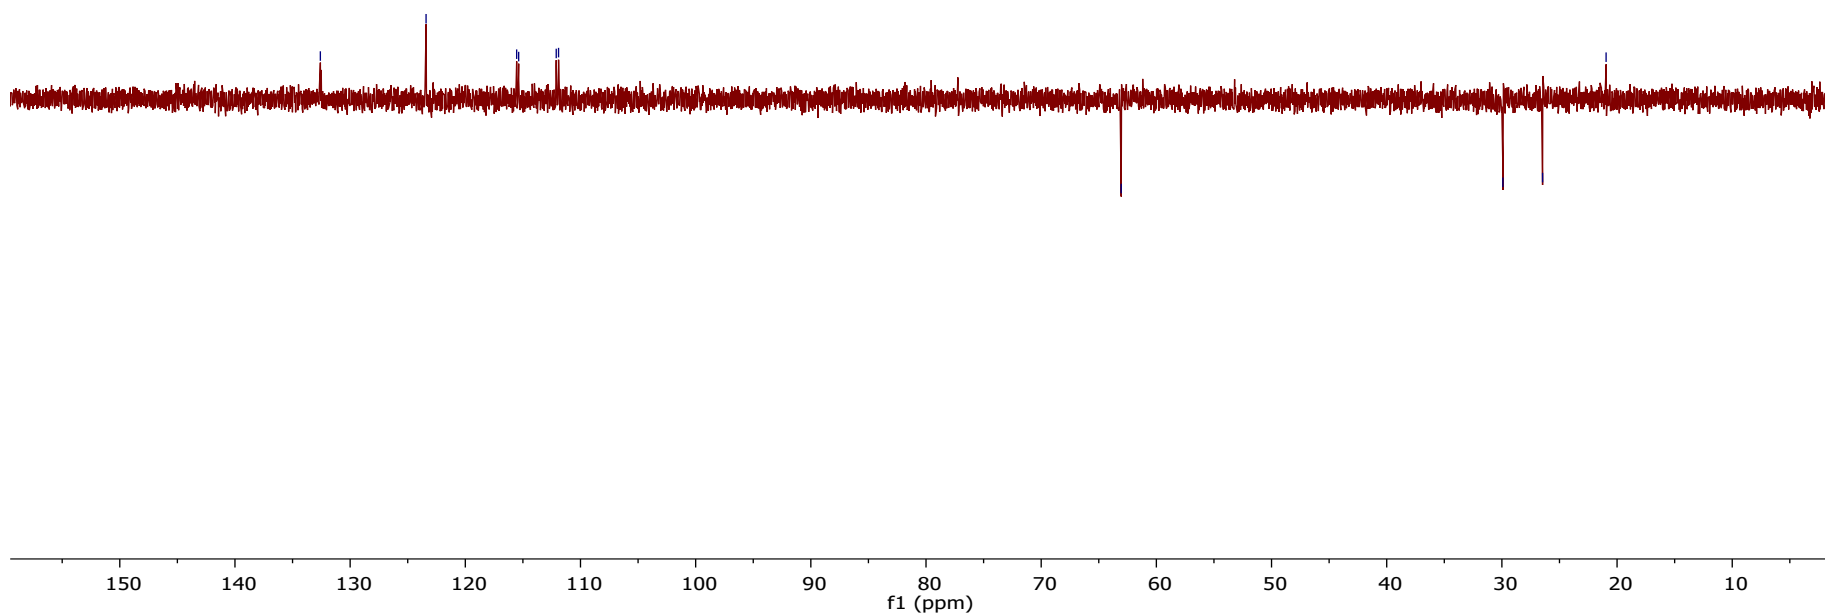

HRMS of compound 10c

|             |                             |                        |         |                 |                                 |
|-------------|-----------------------------|------------------------|---------|-----------------|---------------------------------|
| Sample Name | Sample14                    | Position               | P1-B3   | Instrument Name | QTOF                            |
| User Name   | SYSTEM (SYSTEM)             | Inj Vol                | 5       | InjPosition     |                                 |
| Sample Type | Sample                      | IRM Calibration Status | Success | Data Filename   | ATK-AX-AC-2.d                   |
| ACQ Method  | DIRECT MASS_POSITIVE_01_1.m | Comment                |         | Acquired Time   | 14-08-2025 12:32:56 (UTC+05:30) |

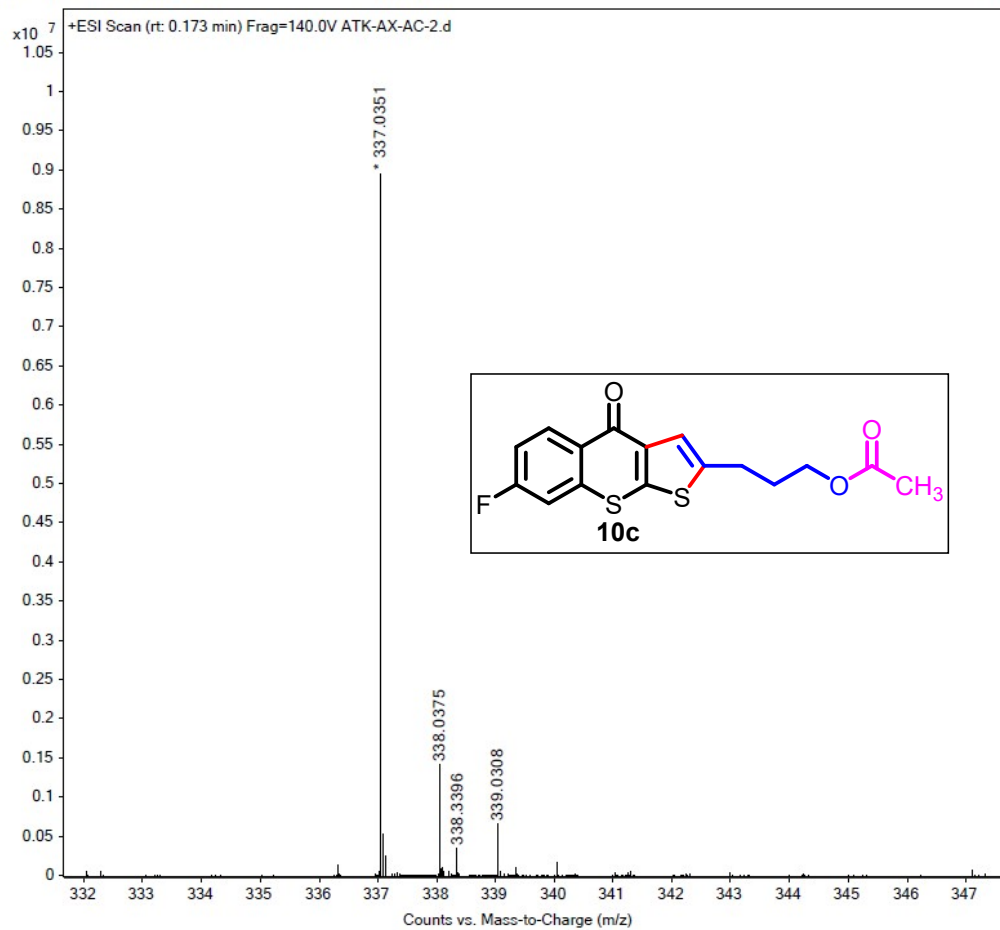

<sup>1</sup>H NMR (500 MHz, CDCl<sub>3</sub>) spectrum of Compound 11a

11a 1H

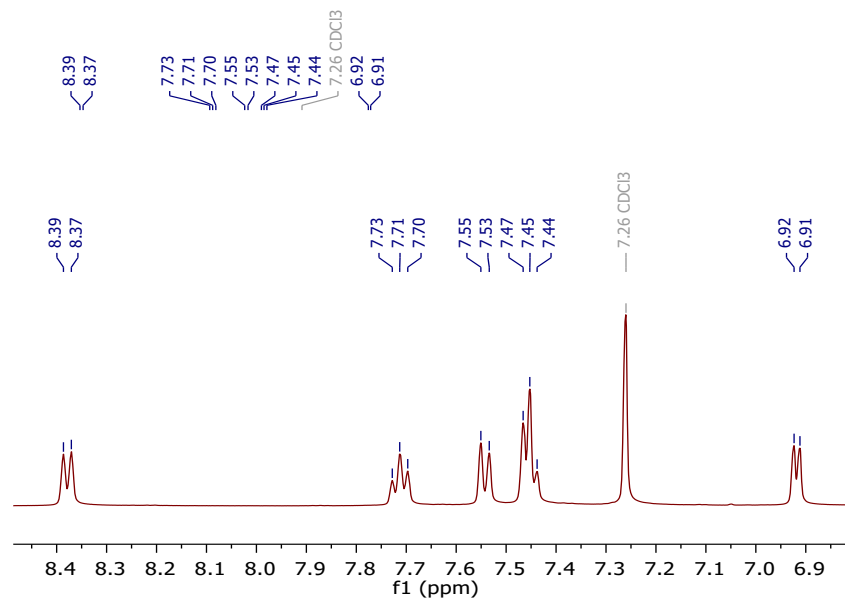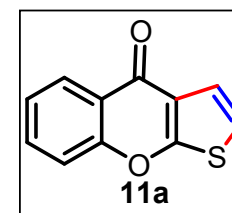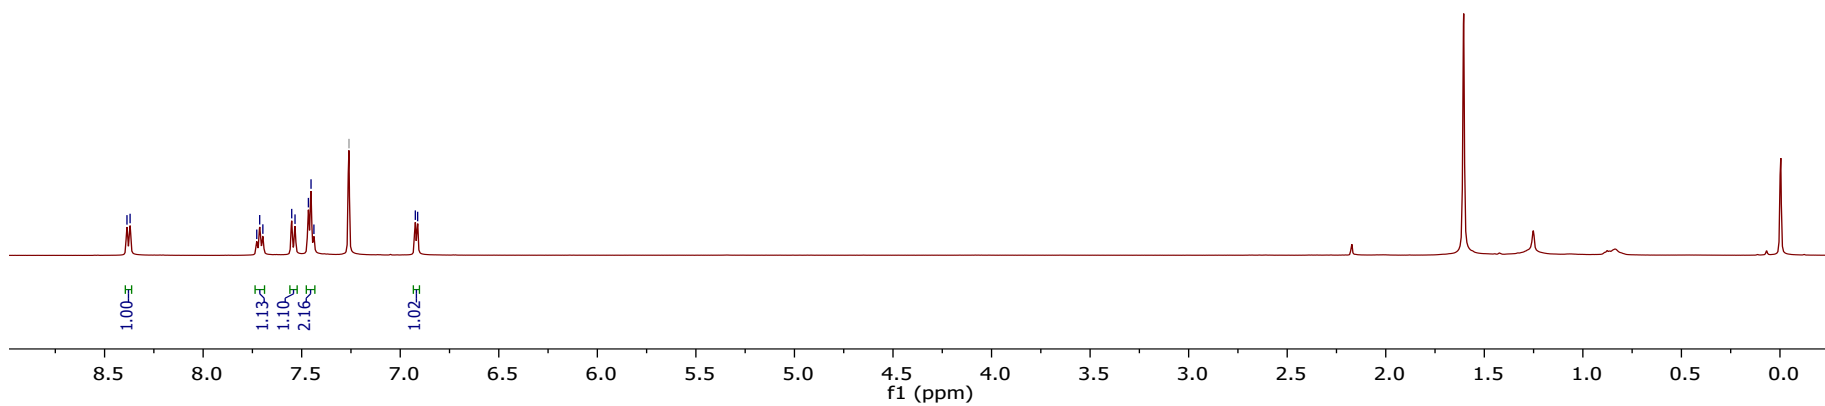

<sup>13</sup>C {<sup>1</sup>H} NMR (125 MHz, CDCl<sub>3</sub>) spectrum of Compound 11a

11a 13C

— 173.04

— 168.05

— 156.80

— 133.52

— 126.72

— 124.81

— 123.42

— 122.53

— 121.34

— 117.51

— 115.28

77.16 CDCl3

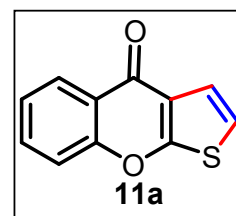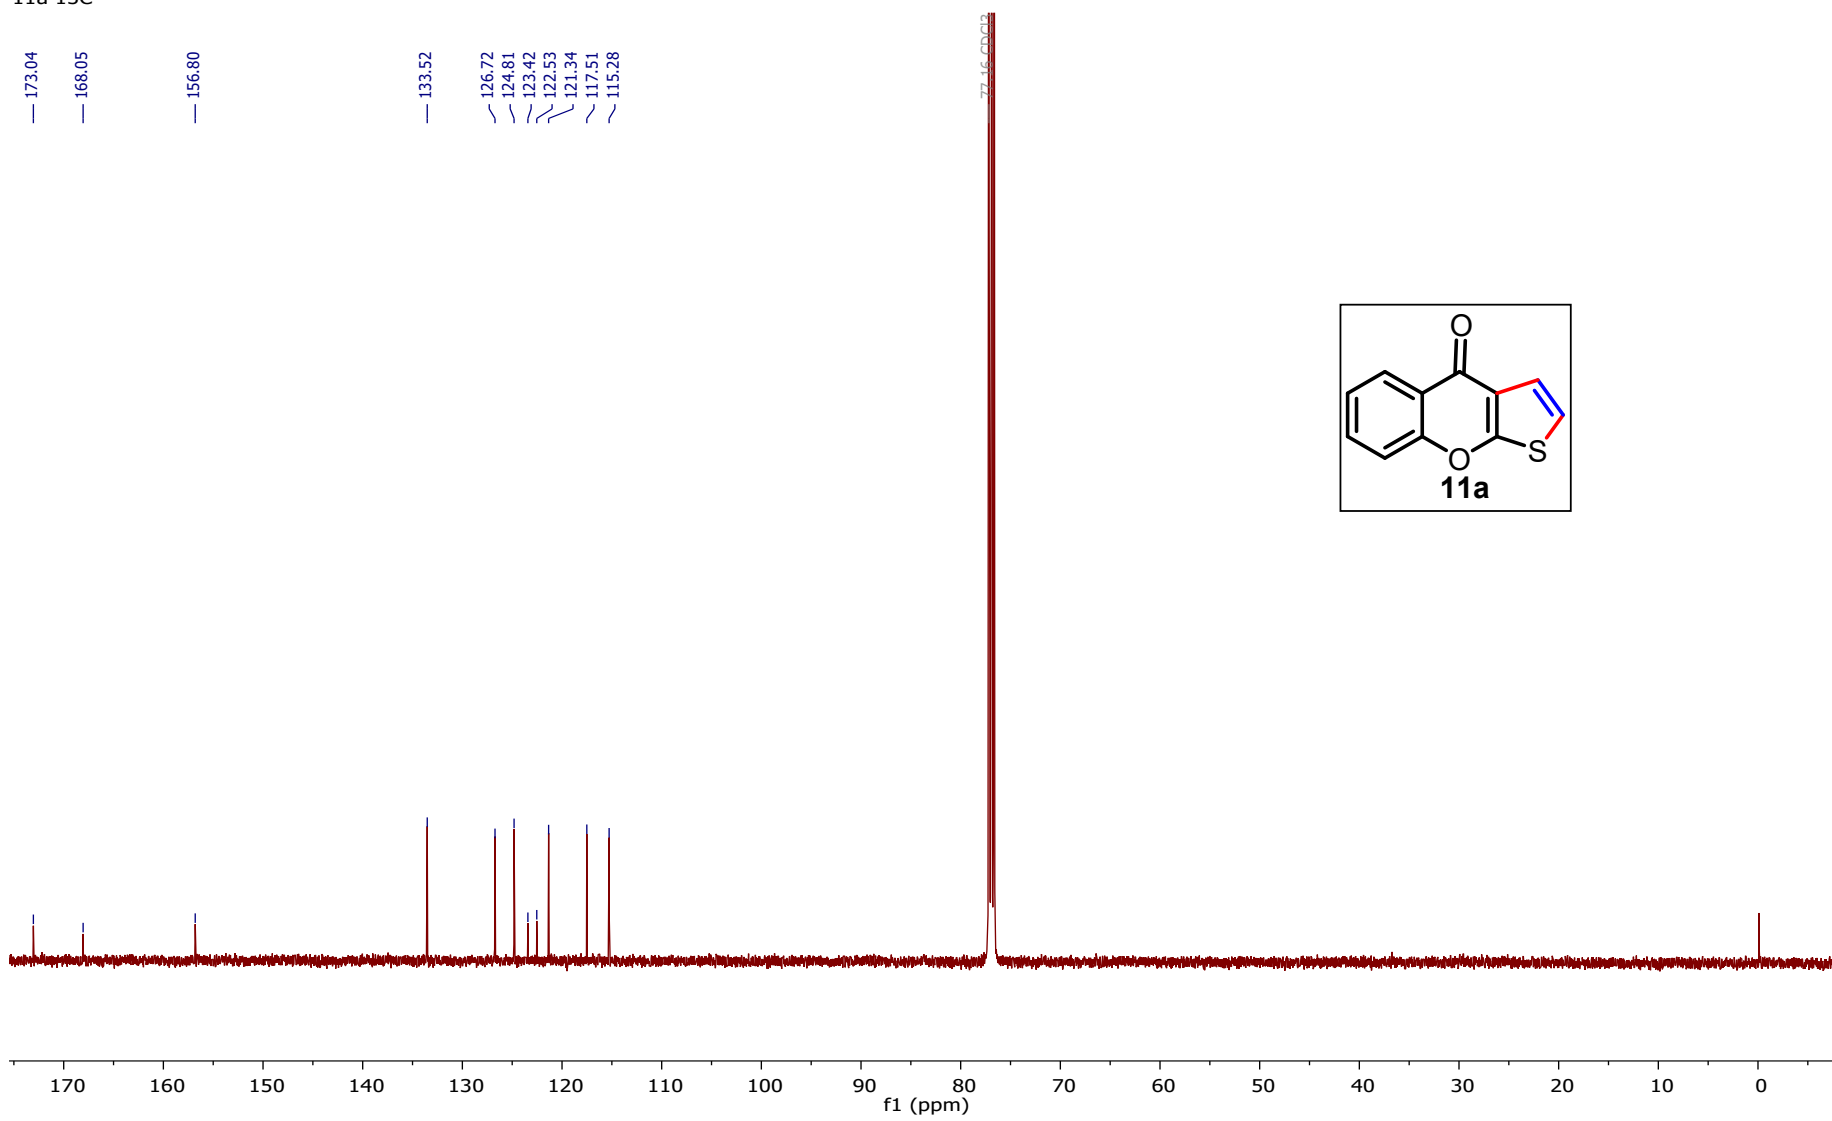

HRMS of compound 11a

Sample6  
SYSTEM (SYSTEM)  
Sample  
DIRECT MASS\_POSITIVE\_01\_1.m

**Position** P1-A4  
**Inj Vol** 5  
**IRM Calibration Status** Success  
**Comment**

**Instrument Name**  
**InjPosition**  
**Data Filename**  
**Acquired Time**

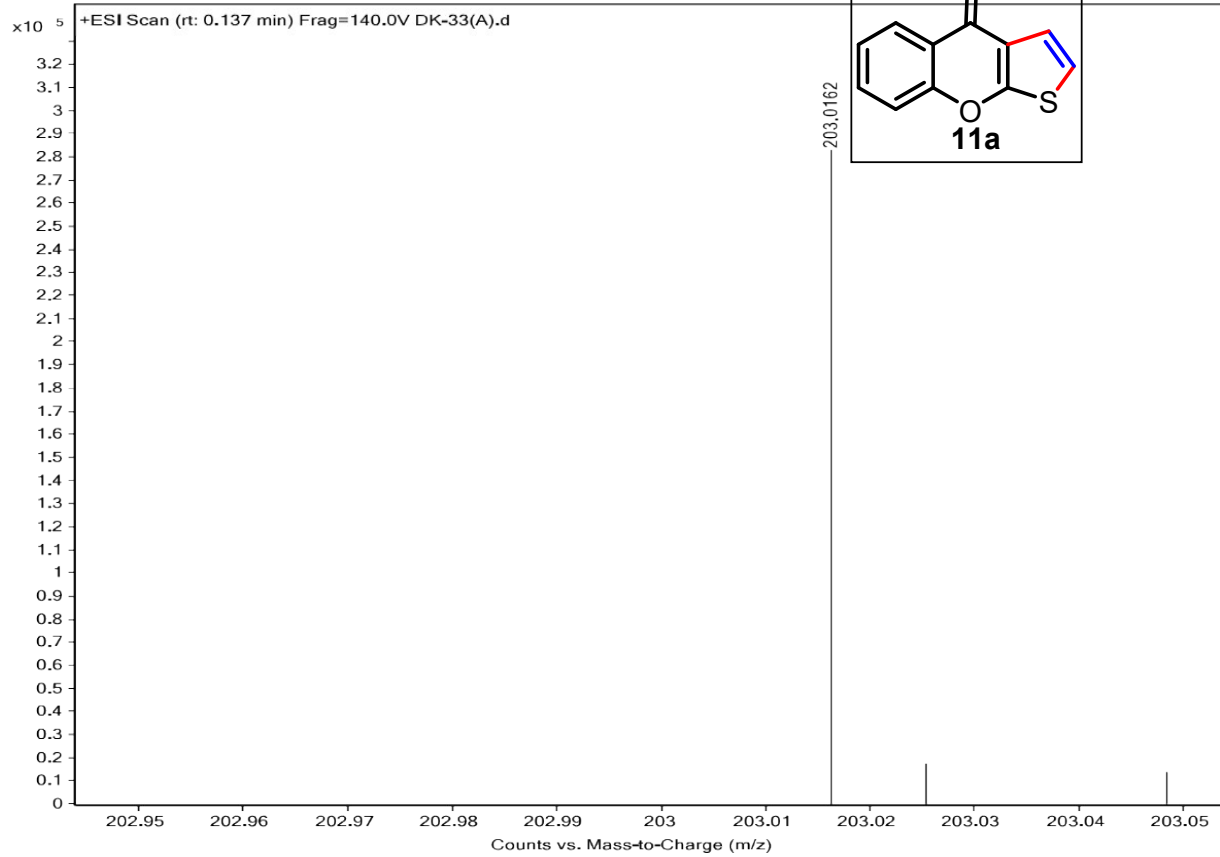

**$^1\text{H}$  NMR (600 MHz,  $\text{CDCl}_3$ ) spectrum of Compound 11b**

11b 1H

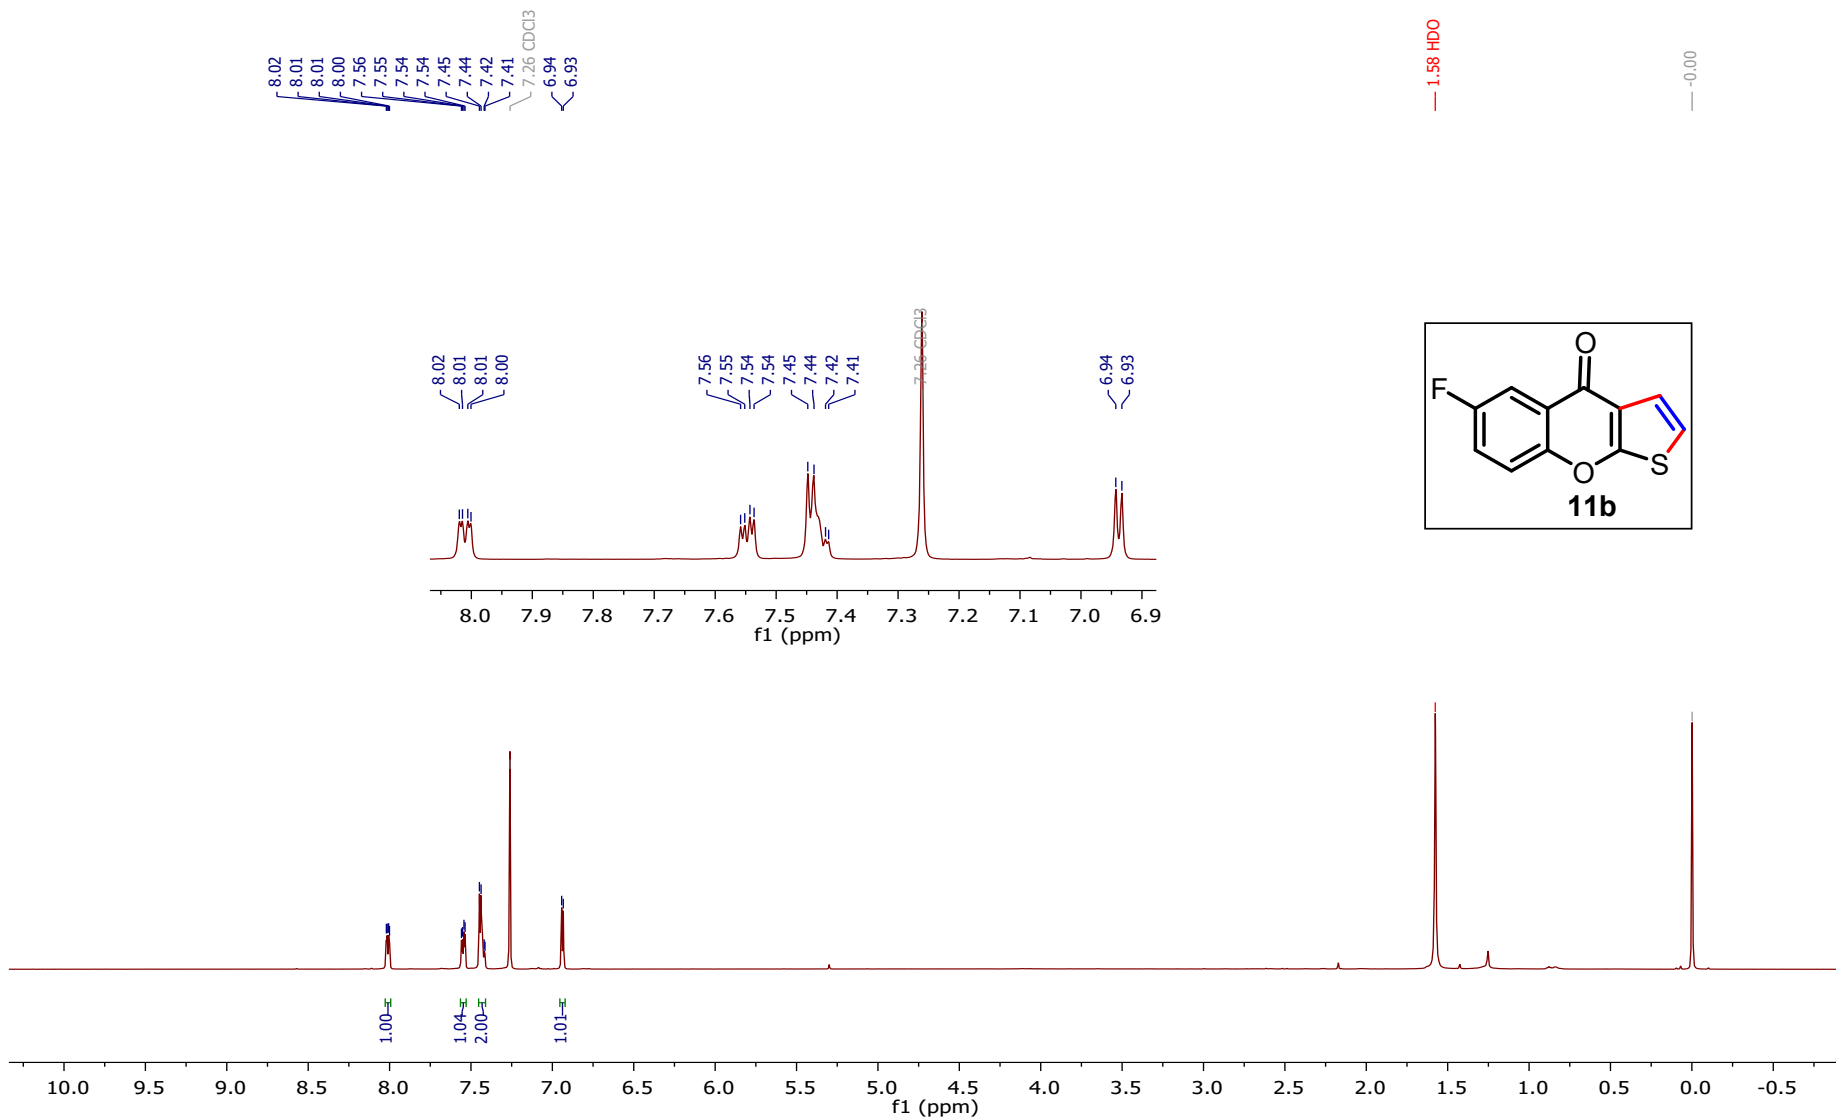

$^{13}\text{C} \{^1\text{H}\}$  NMR (150 MHz,  $\text{CDCl}_3$ ) spectrum of Compound 11b

11b 13C

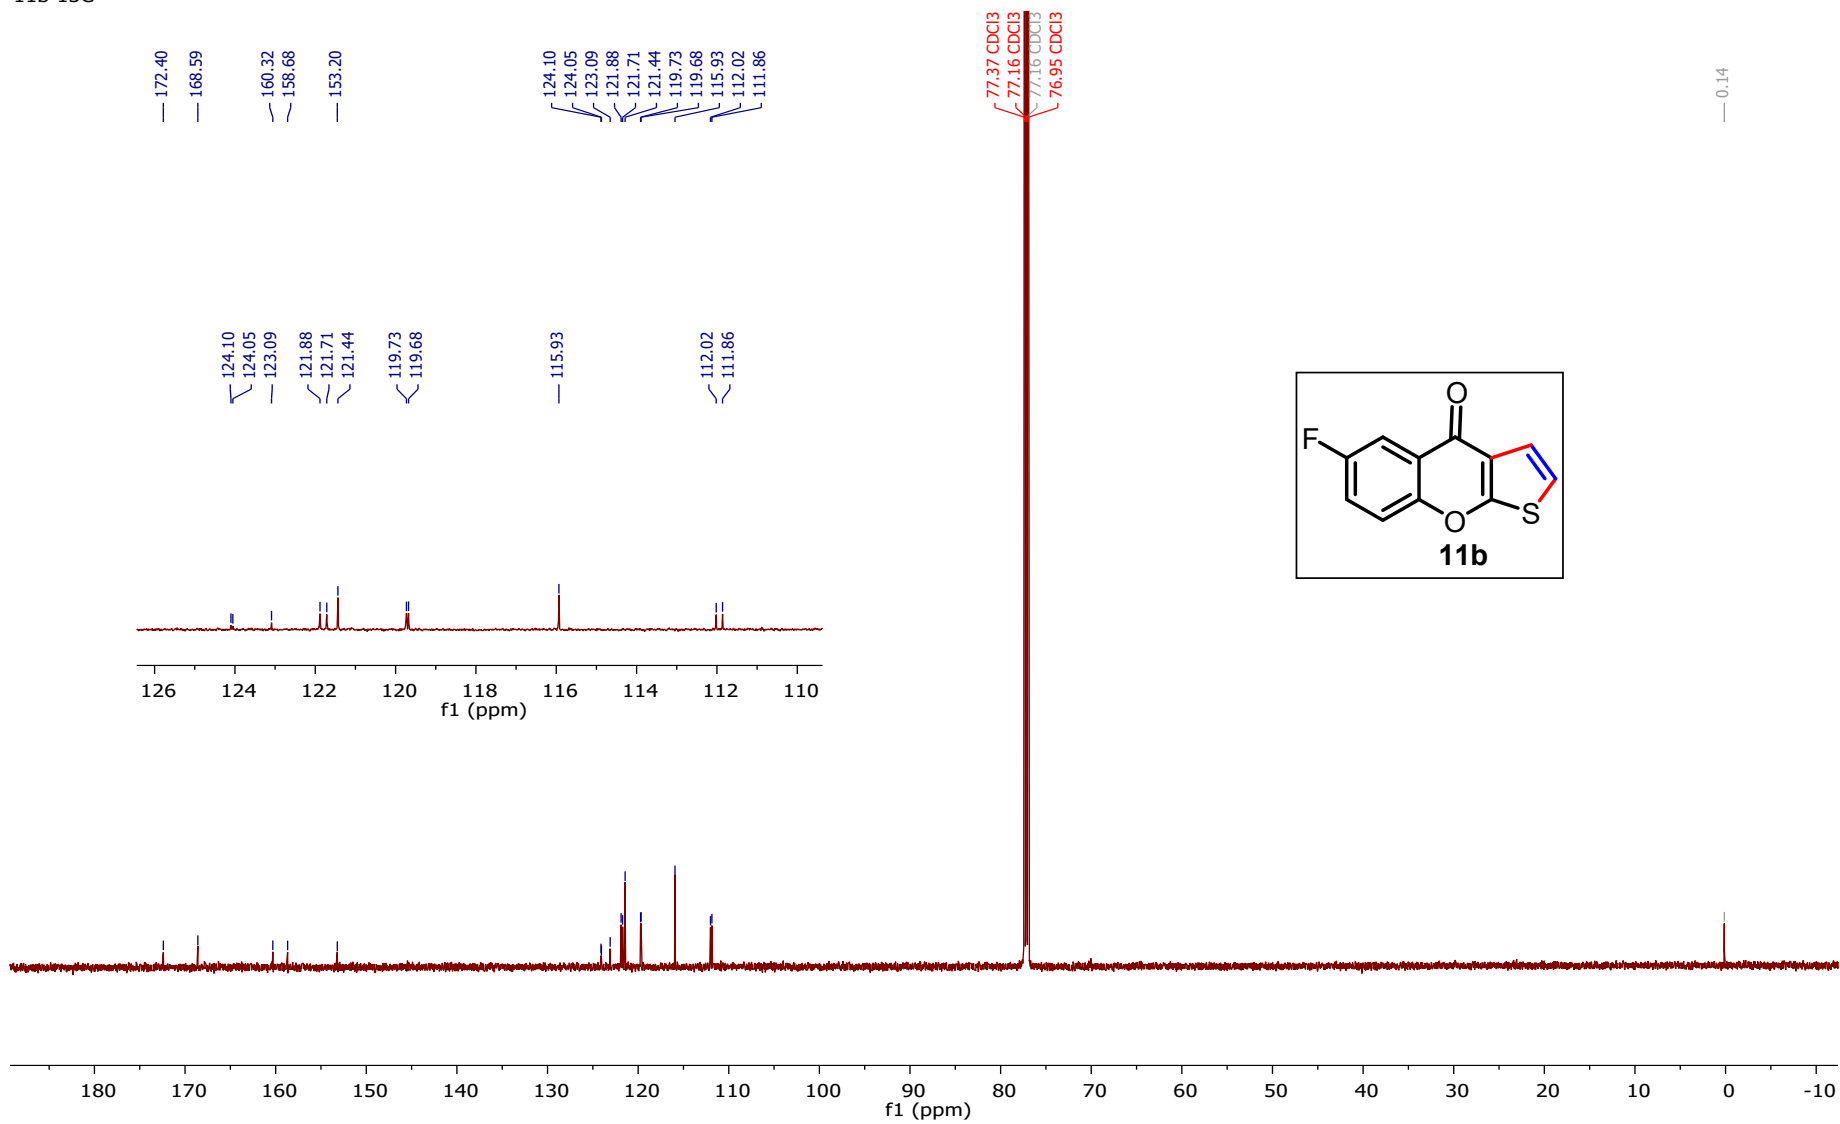

### <sup>19</sup>F NMR of Compound 11b

ATK-DK-49-19F.1.fid — ATK-DK-49-19F

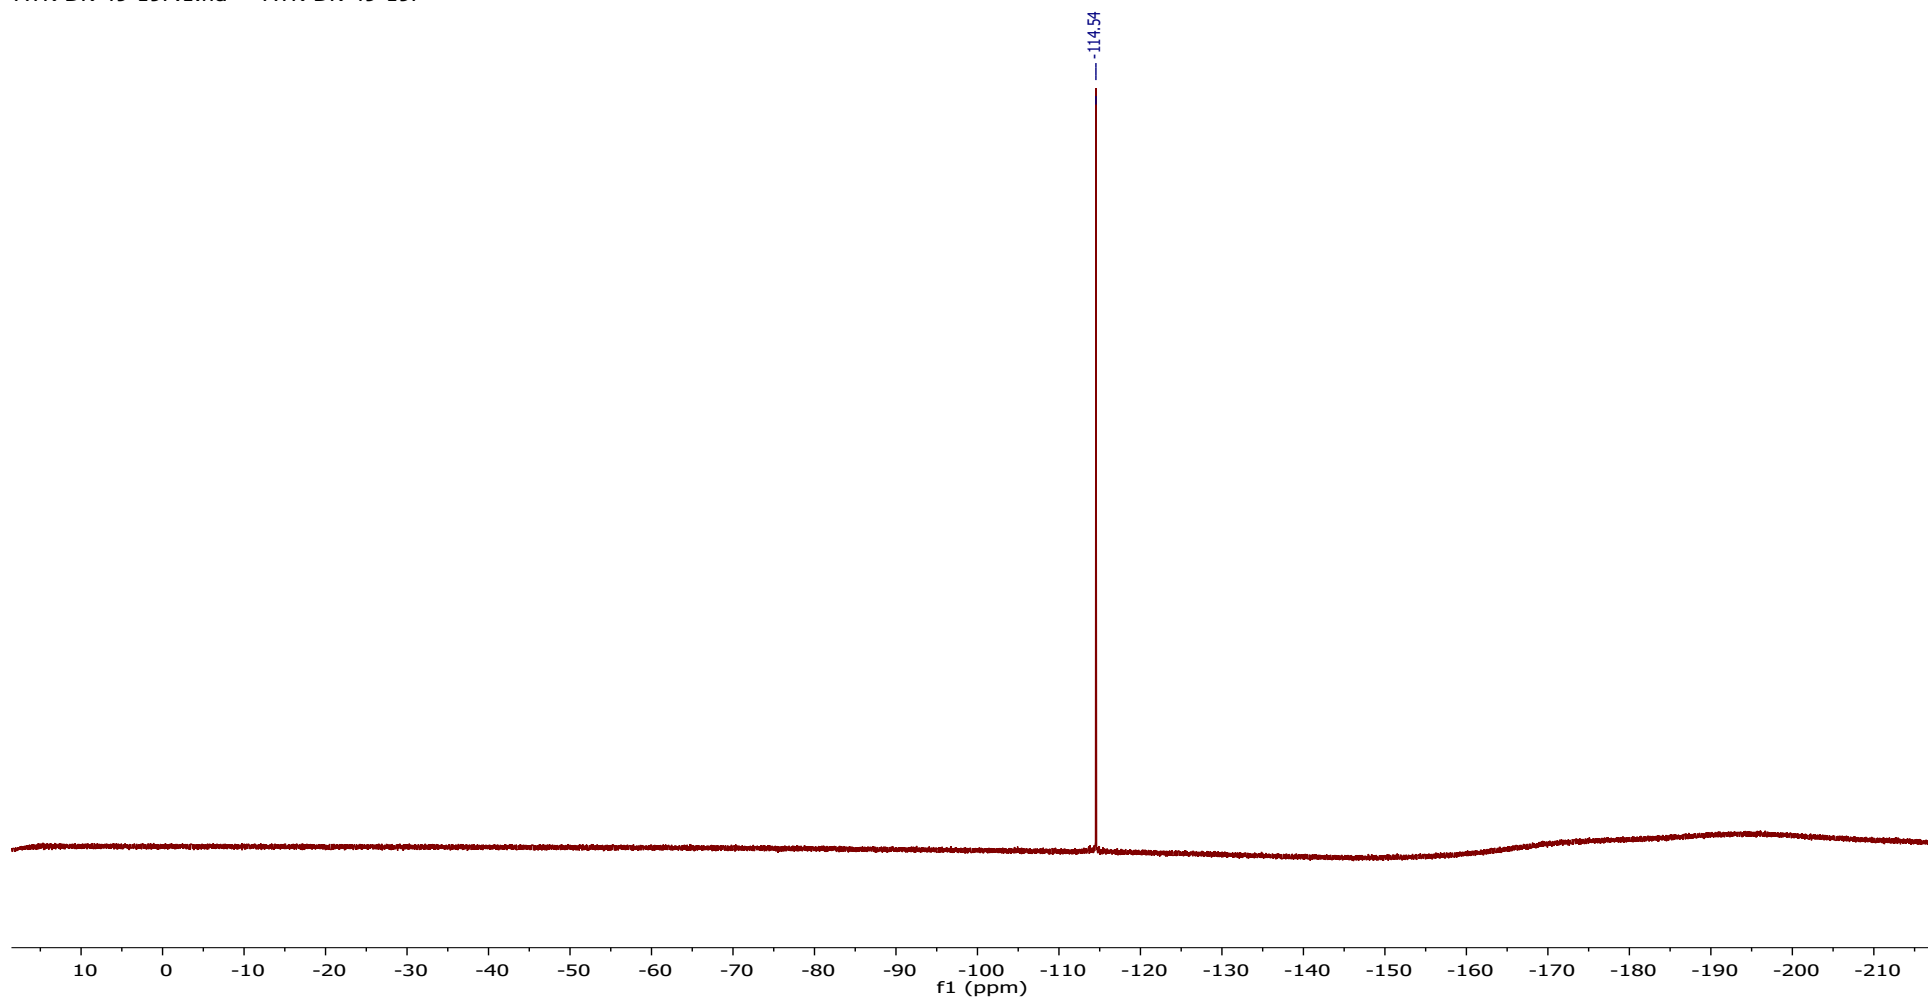

### HRMS of compound 11b

75

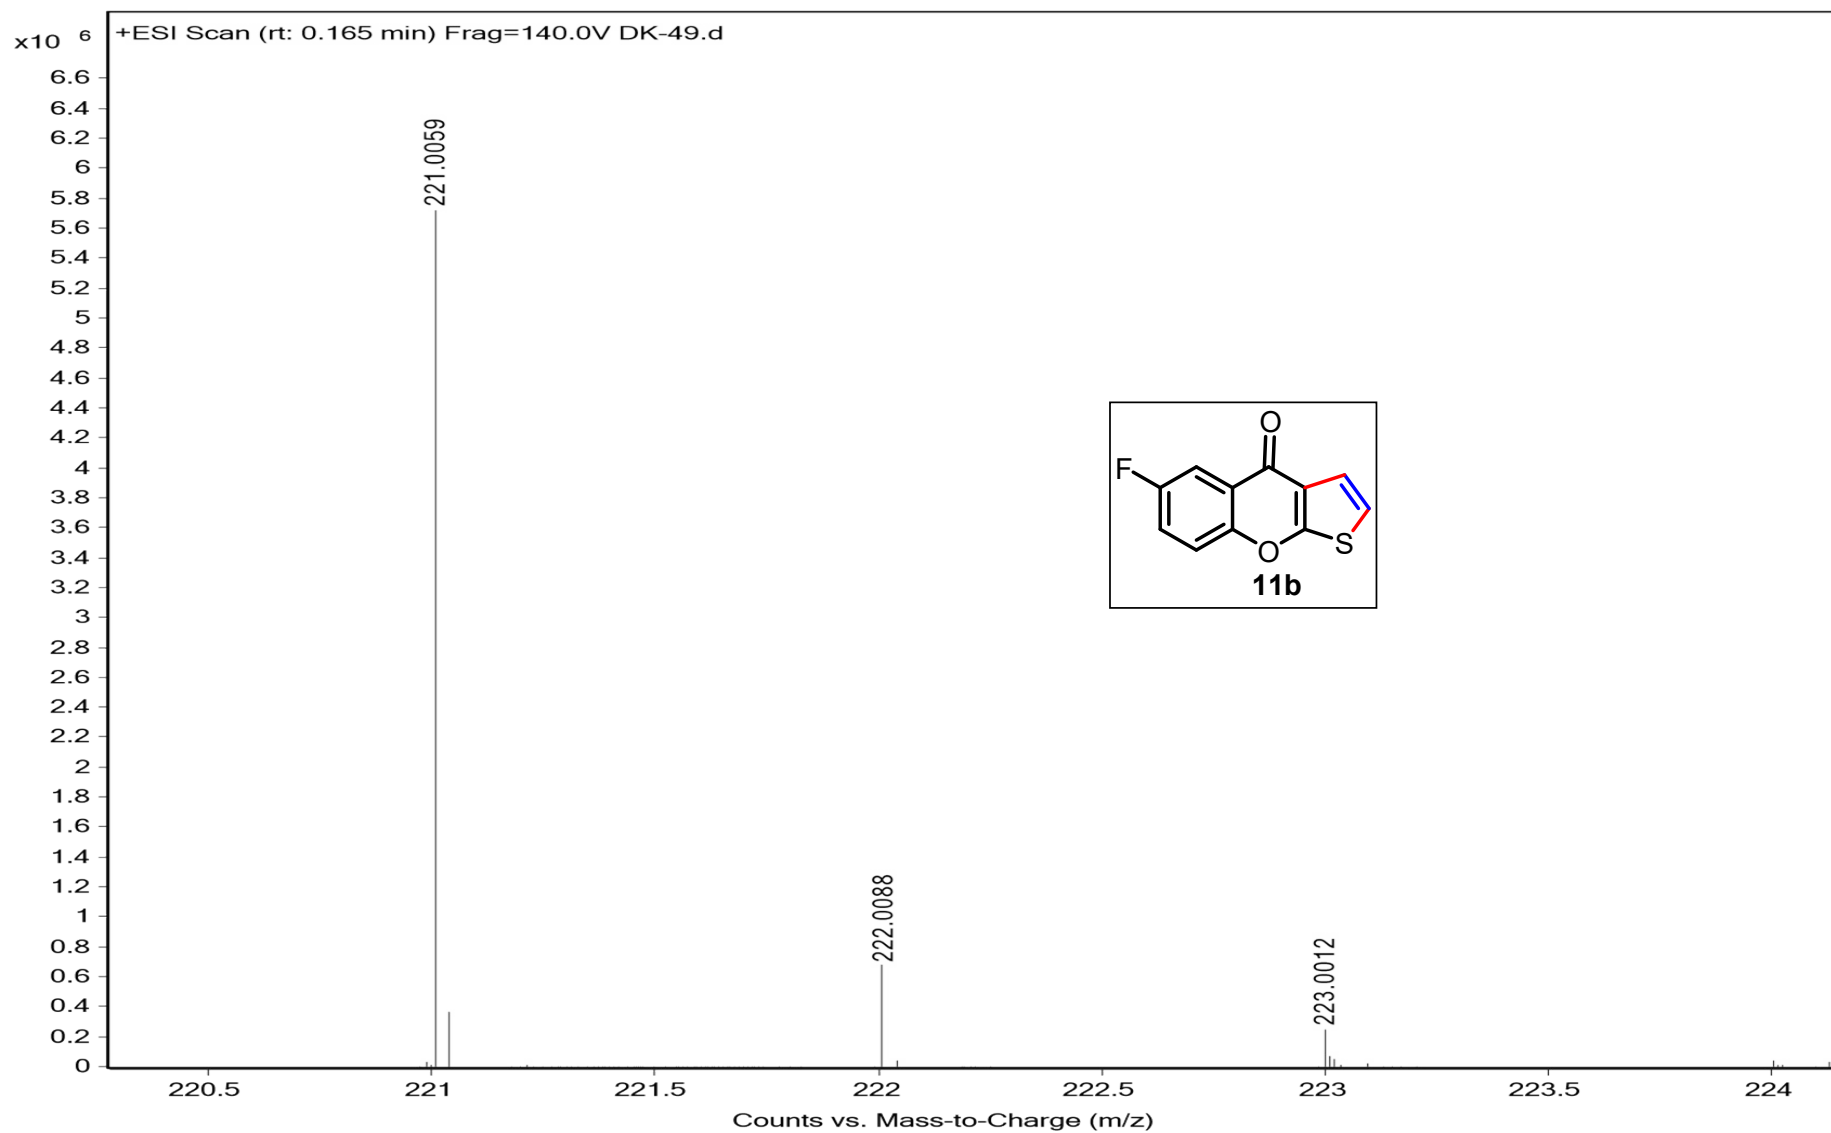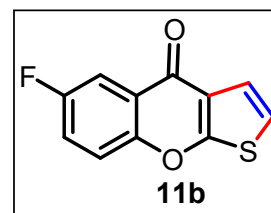

<sup>1</sup>H NMR (400 MHz, CDCl<sub>3</sub>) spectrum of Compound 11c

11c 1H

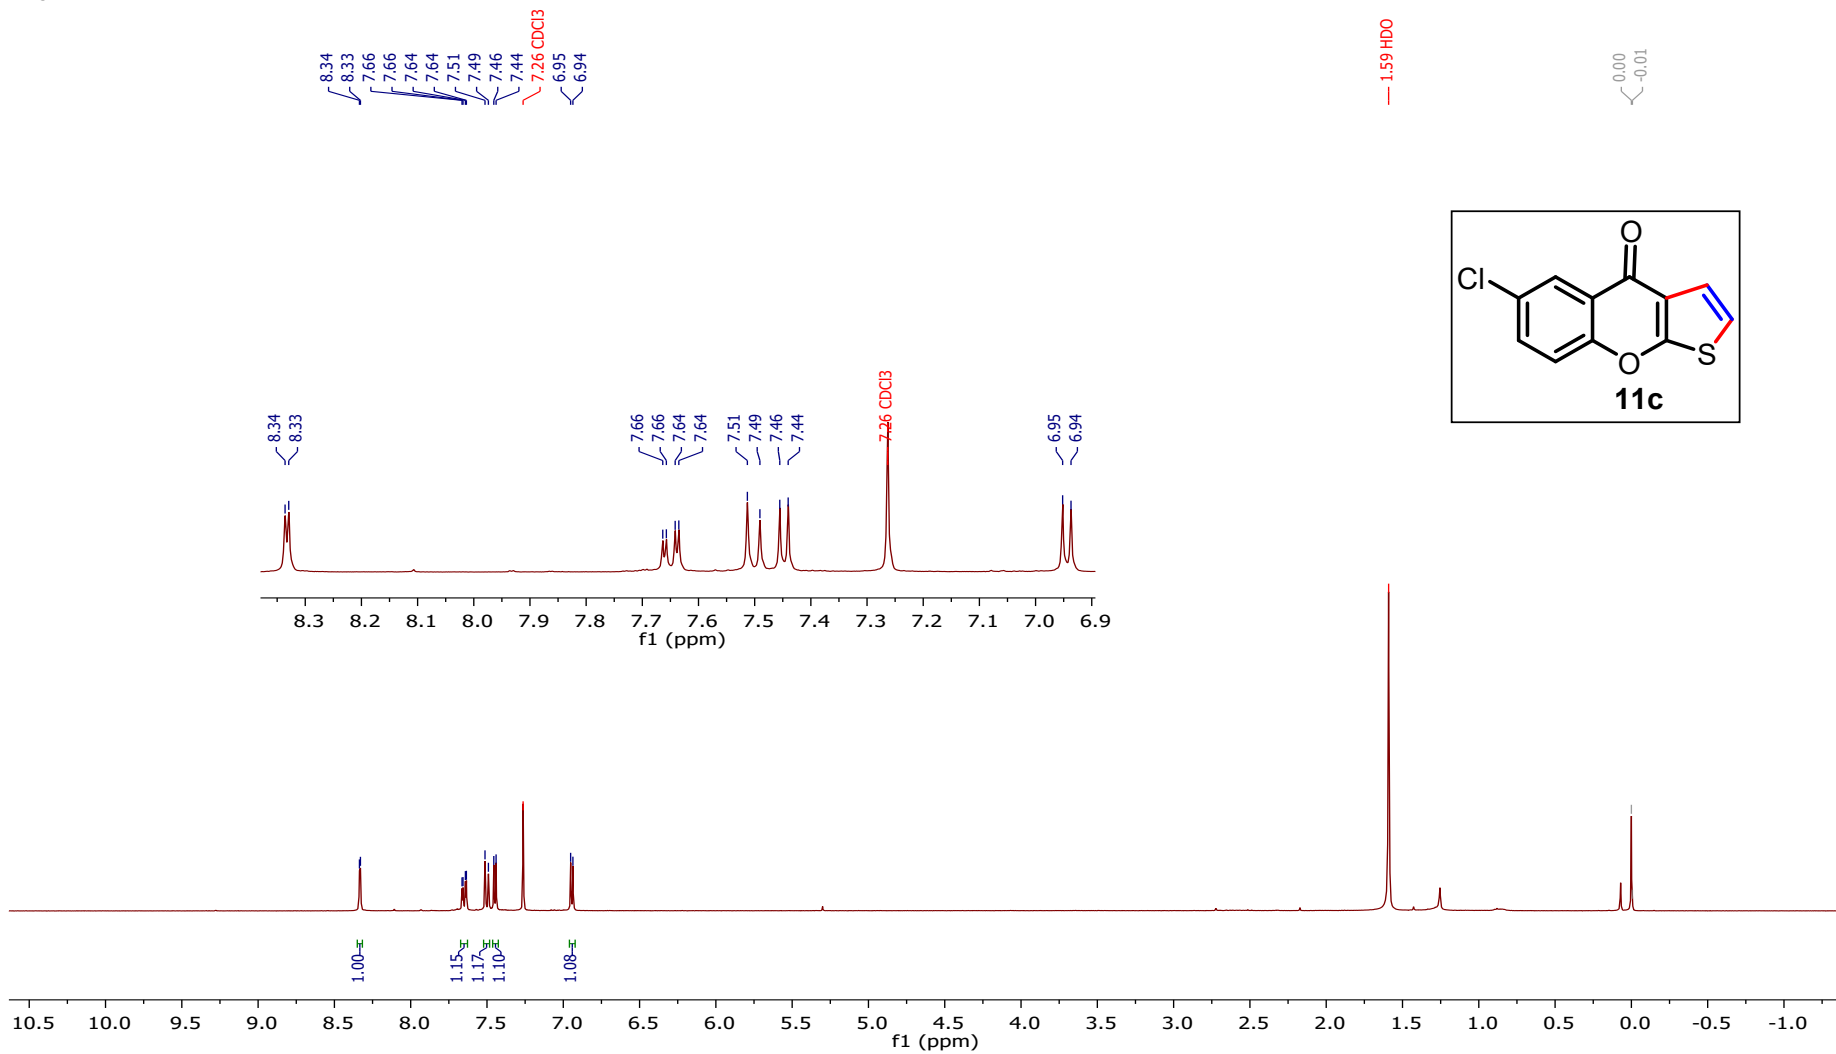

<sup>13</sup>C {<sup>1</sup>H} NMR (125 MHz, CDCl<sub>3</sub>) spectrum of Compound 11c

11c 13C

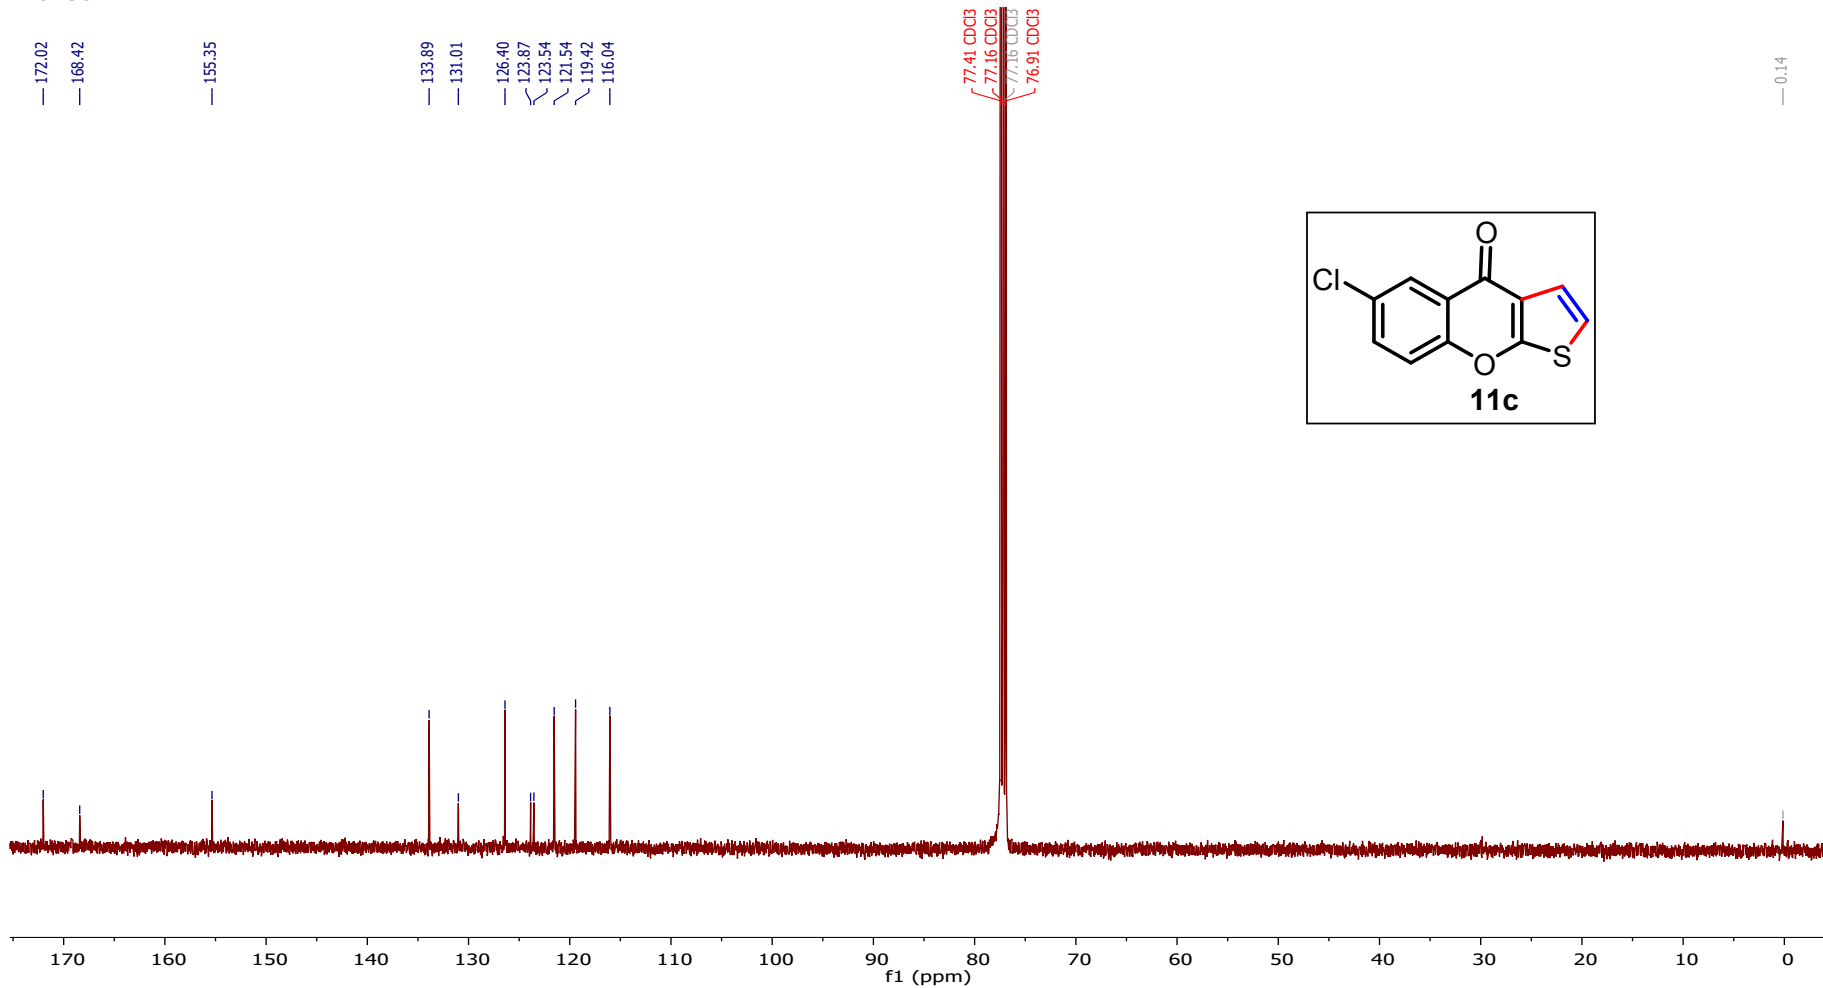

DEPT-135  $^{13}\text{C}$   $\{^1\text{H}\}$  NMR (125 MHz,  $\text{CDCl}_3$ ) spectrum of Compound 11c

11c DEPT-135

— 133.75  
— 126.26  
— 121.40  
— 119.28  
— 115.90

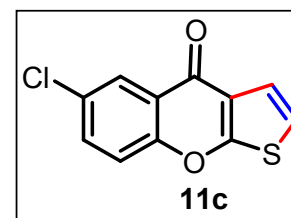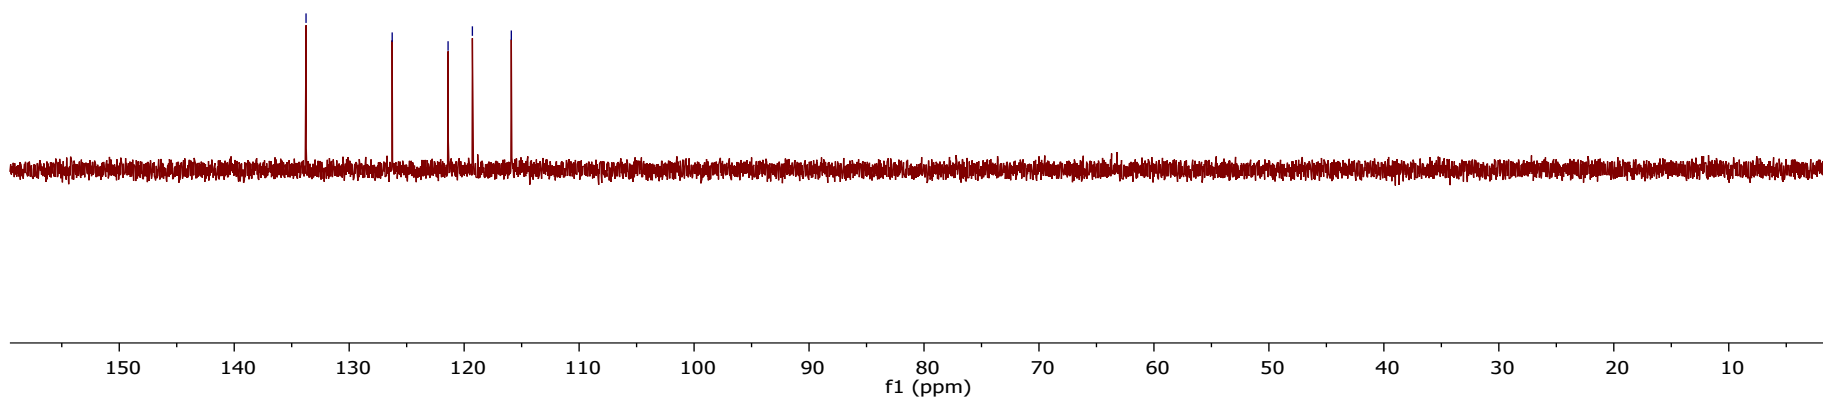

HRMS of compound 11c

**Sample Name**  
**User Name**  
**Sample Type**  
**ACQ Method**

Sample23  
SYSTEM (SYSTEM)  
Sample  
DIRECT MASS\_POSITIVE\_01\_1,m

**Position**  
**Inj Vol**  
**IRM Calibration Status**  
**Comment**

P1-C1  
5  
Success

**Instrument Name**  
**InjPosition**  
**Data Filename**  
**Acquired Time**

QTOF  
  
ATK-OK-52,d  
24-11-2025 15:33:50 (UTC+05:30)

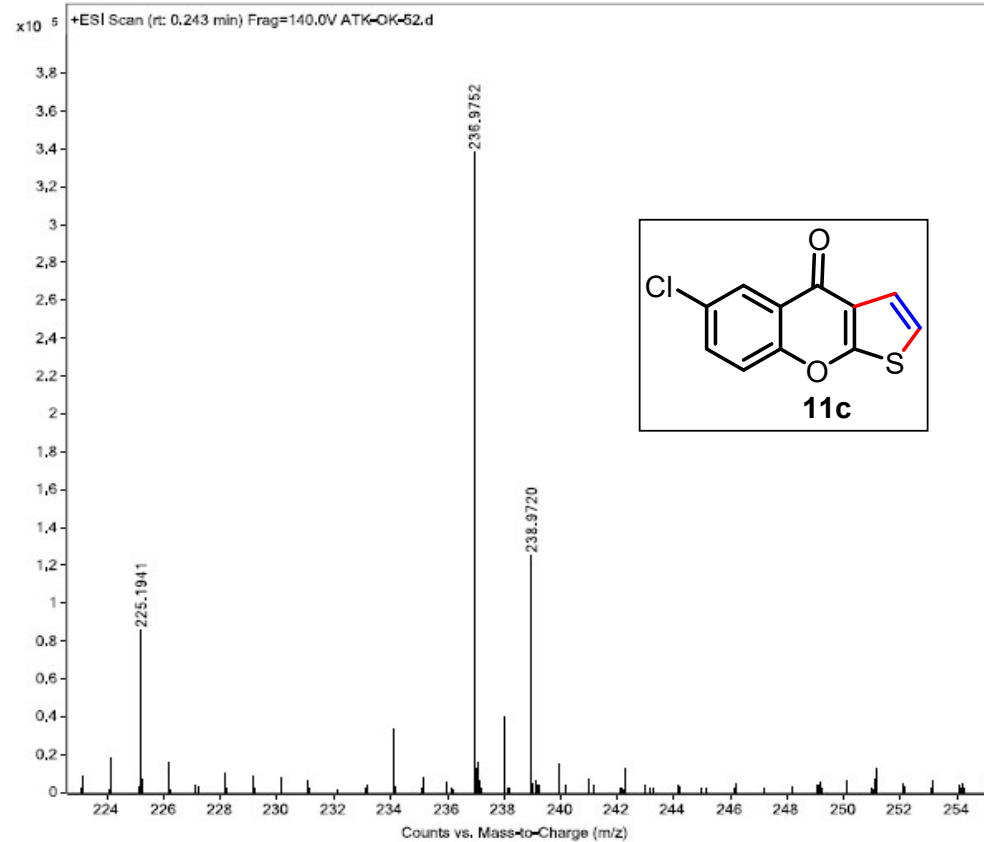

<sup>1</sup>H NMR (500 MHz, CDCl<sub>3</sub>) spectrum of Compound 11d

11d 1H.1.fid — ATK-DK-54-B-1H

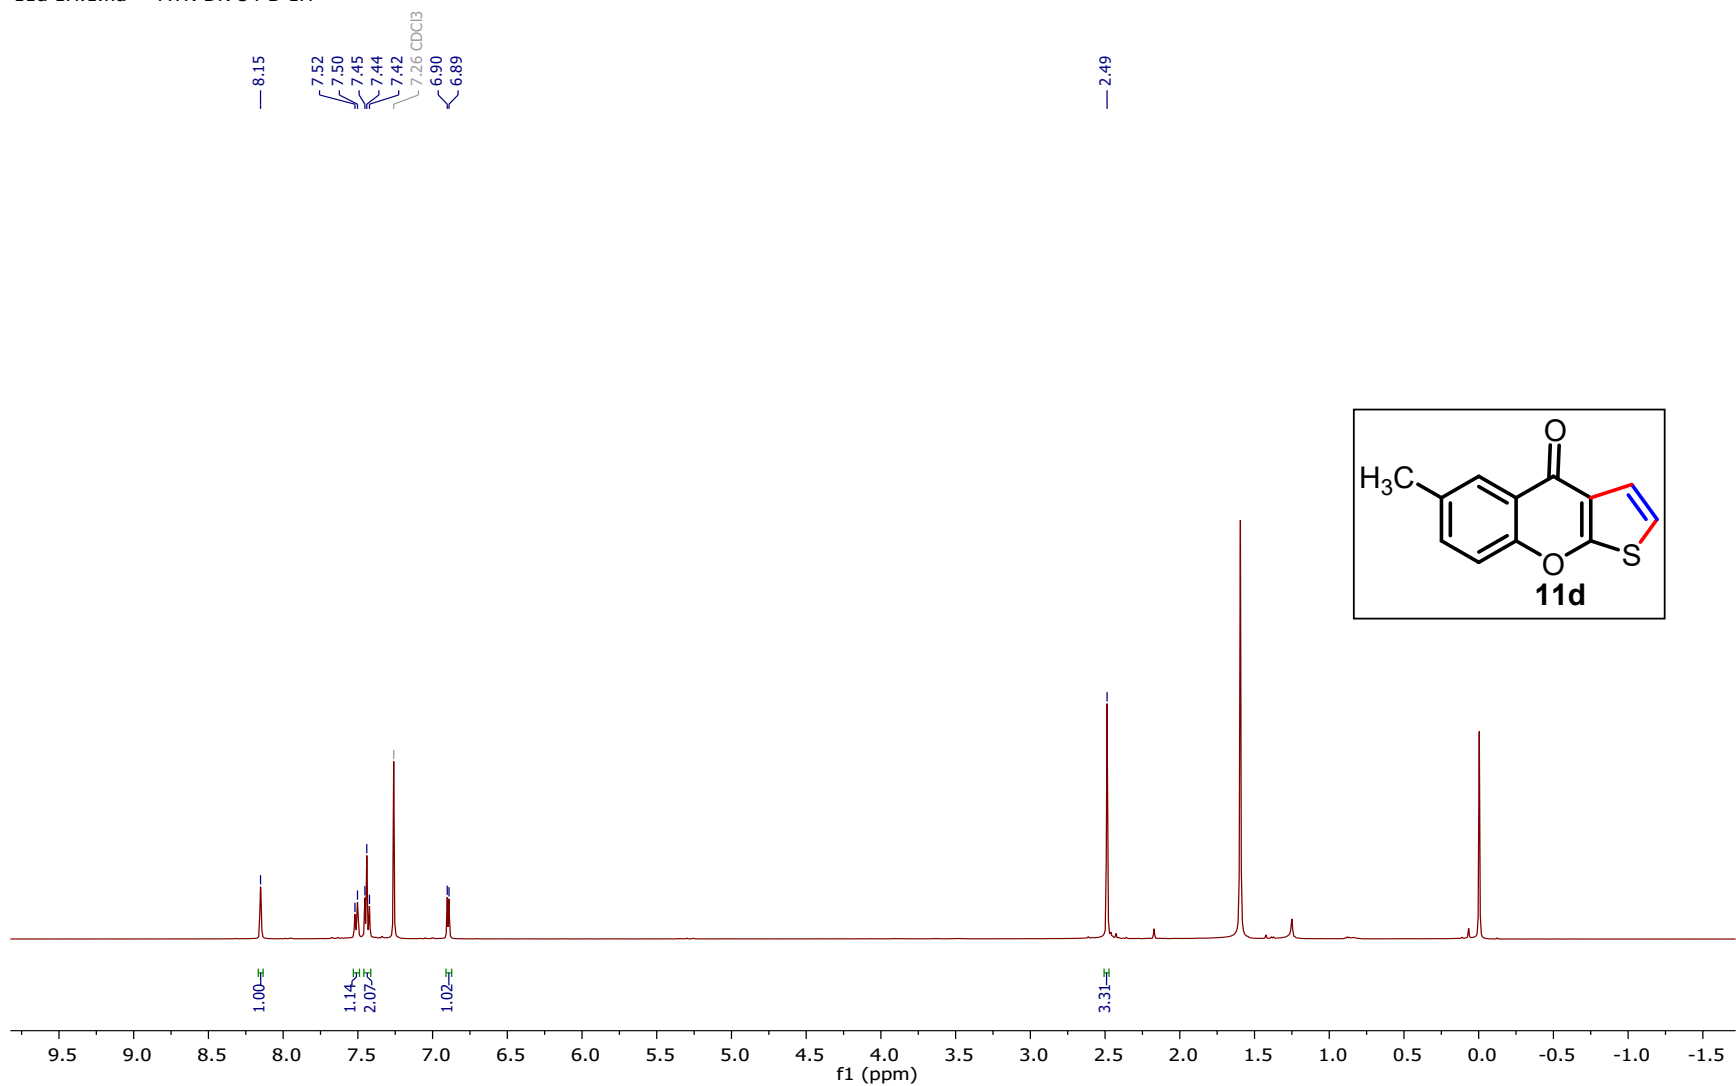

<sup>13</sup>C {<sup>1</sup>H} NMR (125 MHz, CDCl<sub>3</sub>) spectrum of Compound 11d

11d 13C

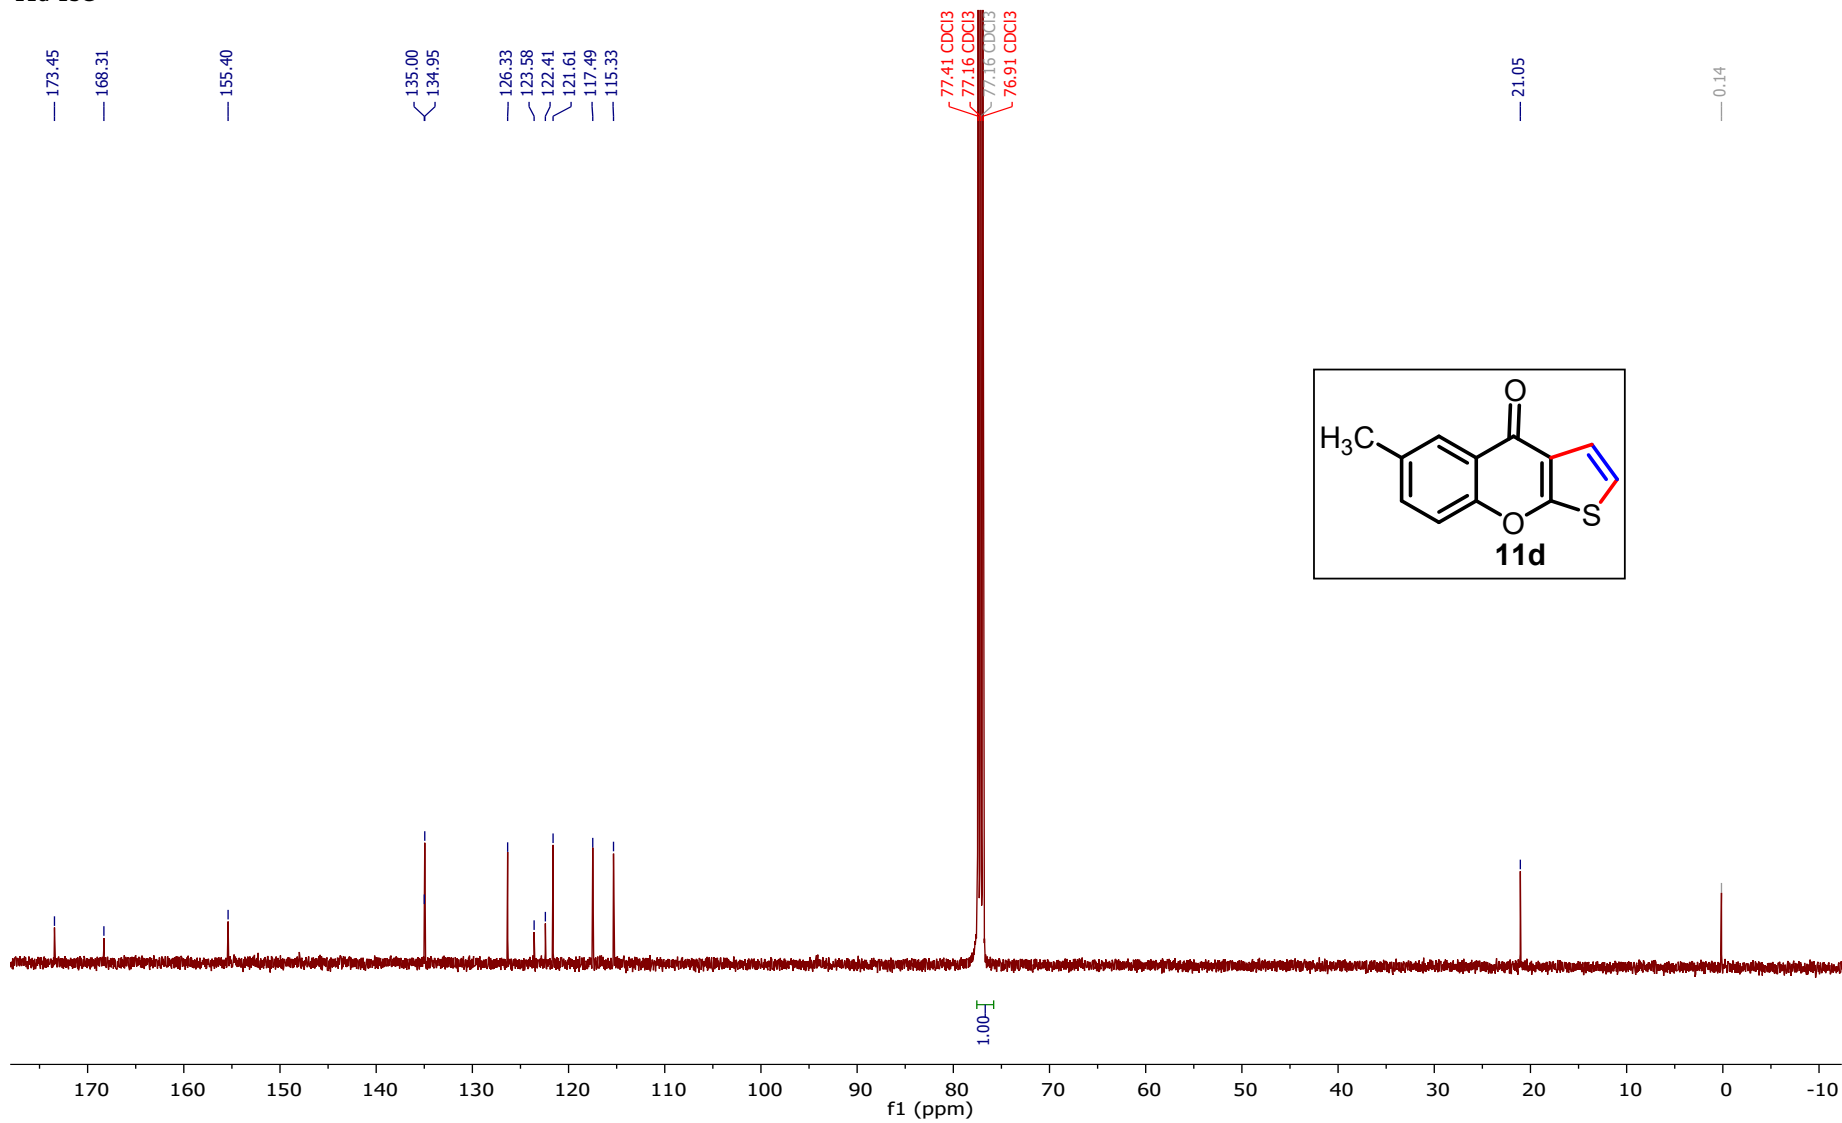

HRMS of compound 11d

**Sample Name**  
**User Name**  
**Sample Type**  
**ACQ Method**

Sample13  
SYSTEM (SYSTEM)  
Sample  
DIRECT MASS\_POSITIVE\_50\_1500.m

**Position**  
**Inj Vol**  
**IRM Calibration Status**  
**Comment**

P1-B2  
5  
Success

**Instrument Name**  
**InjPosition**  
**Data Filename**  
**Acquired Time**

QTOF  
DK-54,d  
01-05-2025 15:22:28 (UTC+05:30)

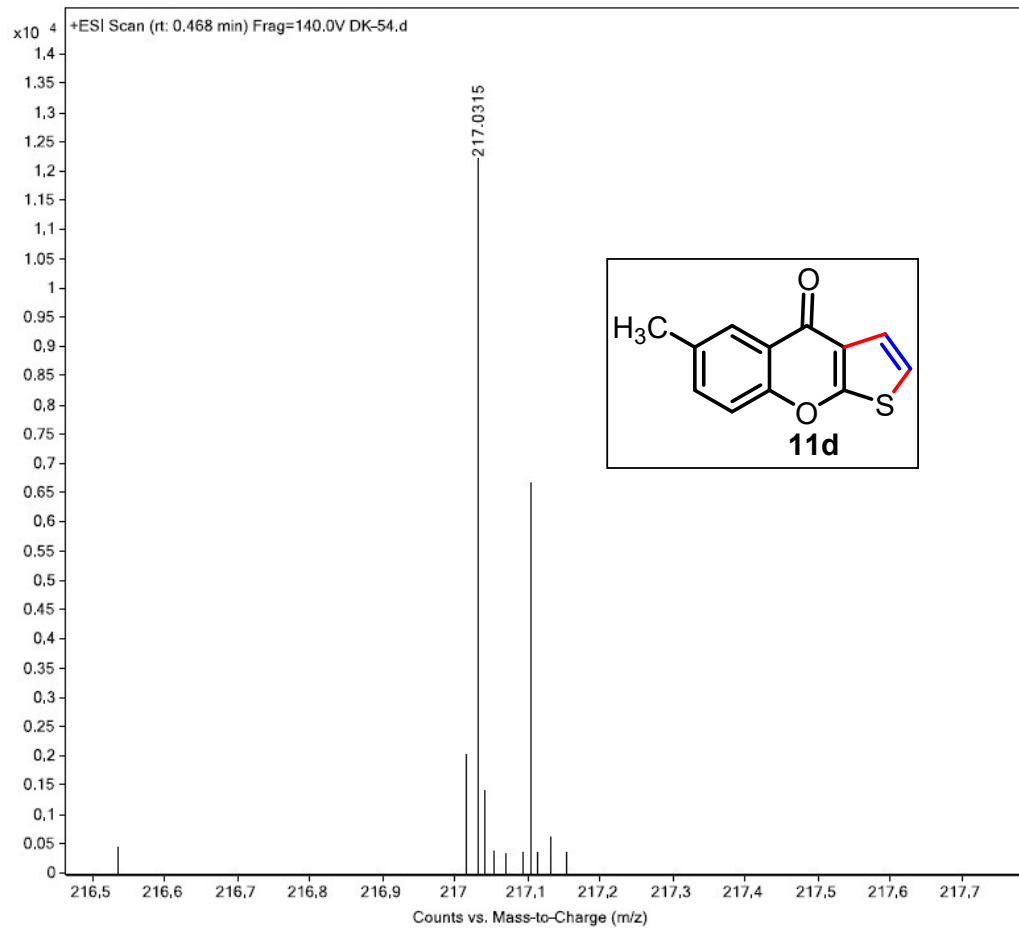

**<sup>1</sup>H NMR (500 MHz, CDCl<sub>3</sub>) spectrum of Compound 11e**

11e 1H

7.73  
7.48  
7.46  
7.44  
7.30  
7.28  
7.26 CDCl3  
6.91  
6.90

3.93

1.60 H2O

-0.00  
-0.00  
-0.01

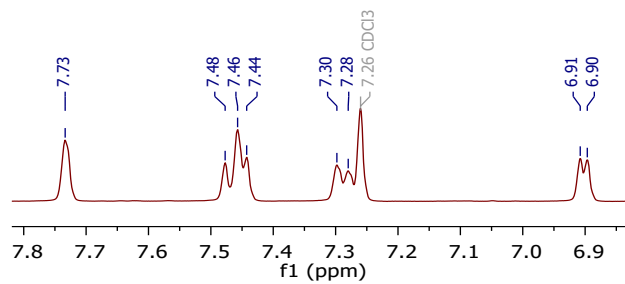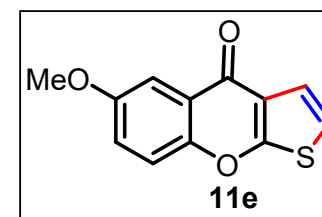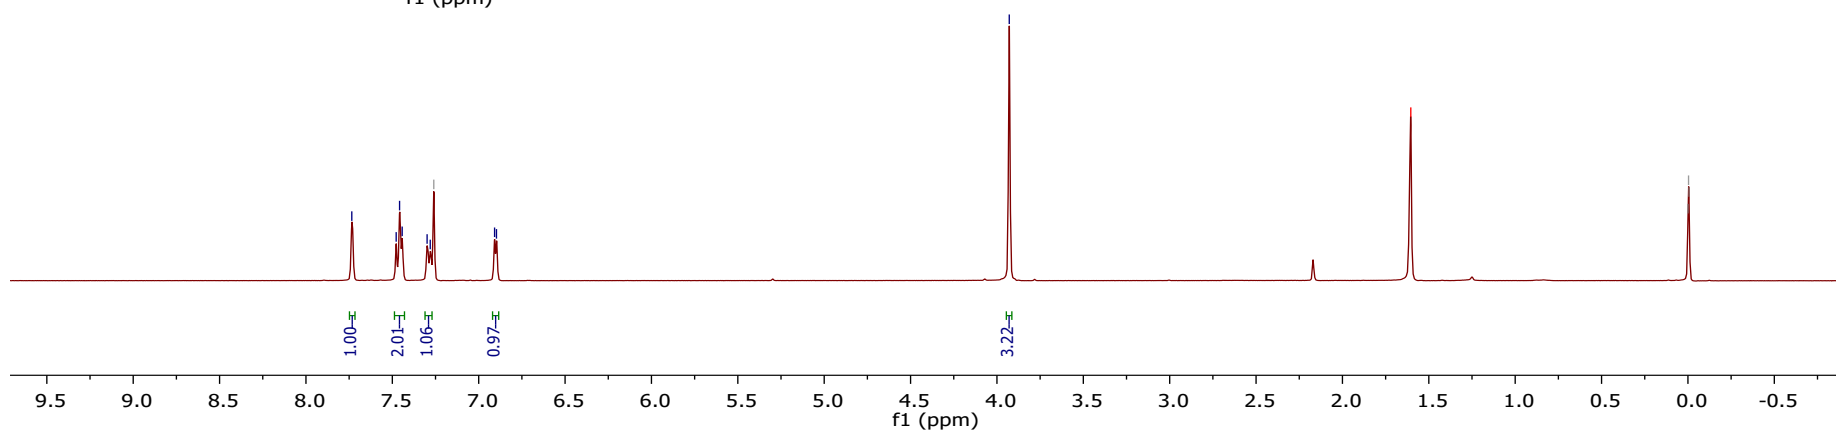

$^{13}\text{C} \{^1\text{H}\}$  NMR (125 MHz,  $\text{CDCl}_3$ ) spectrum of Compound 11e

11e 13C

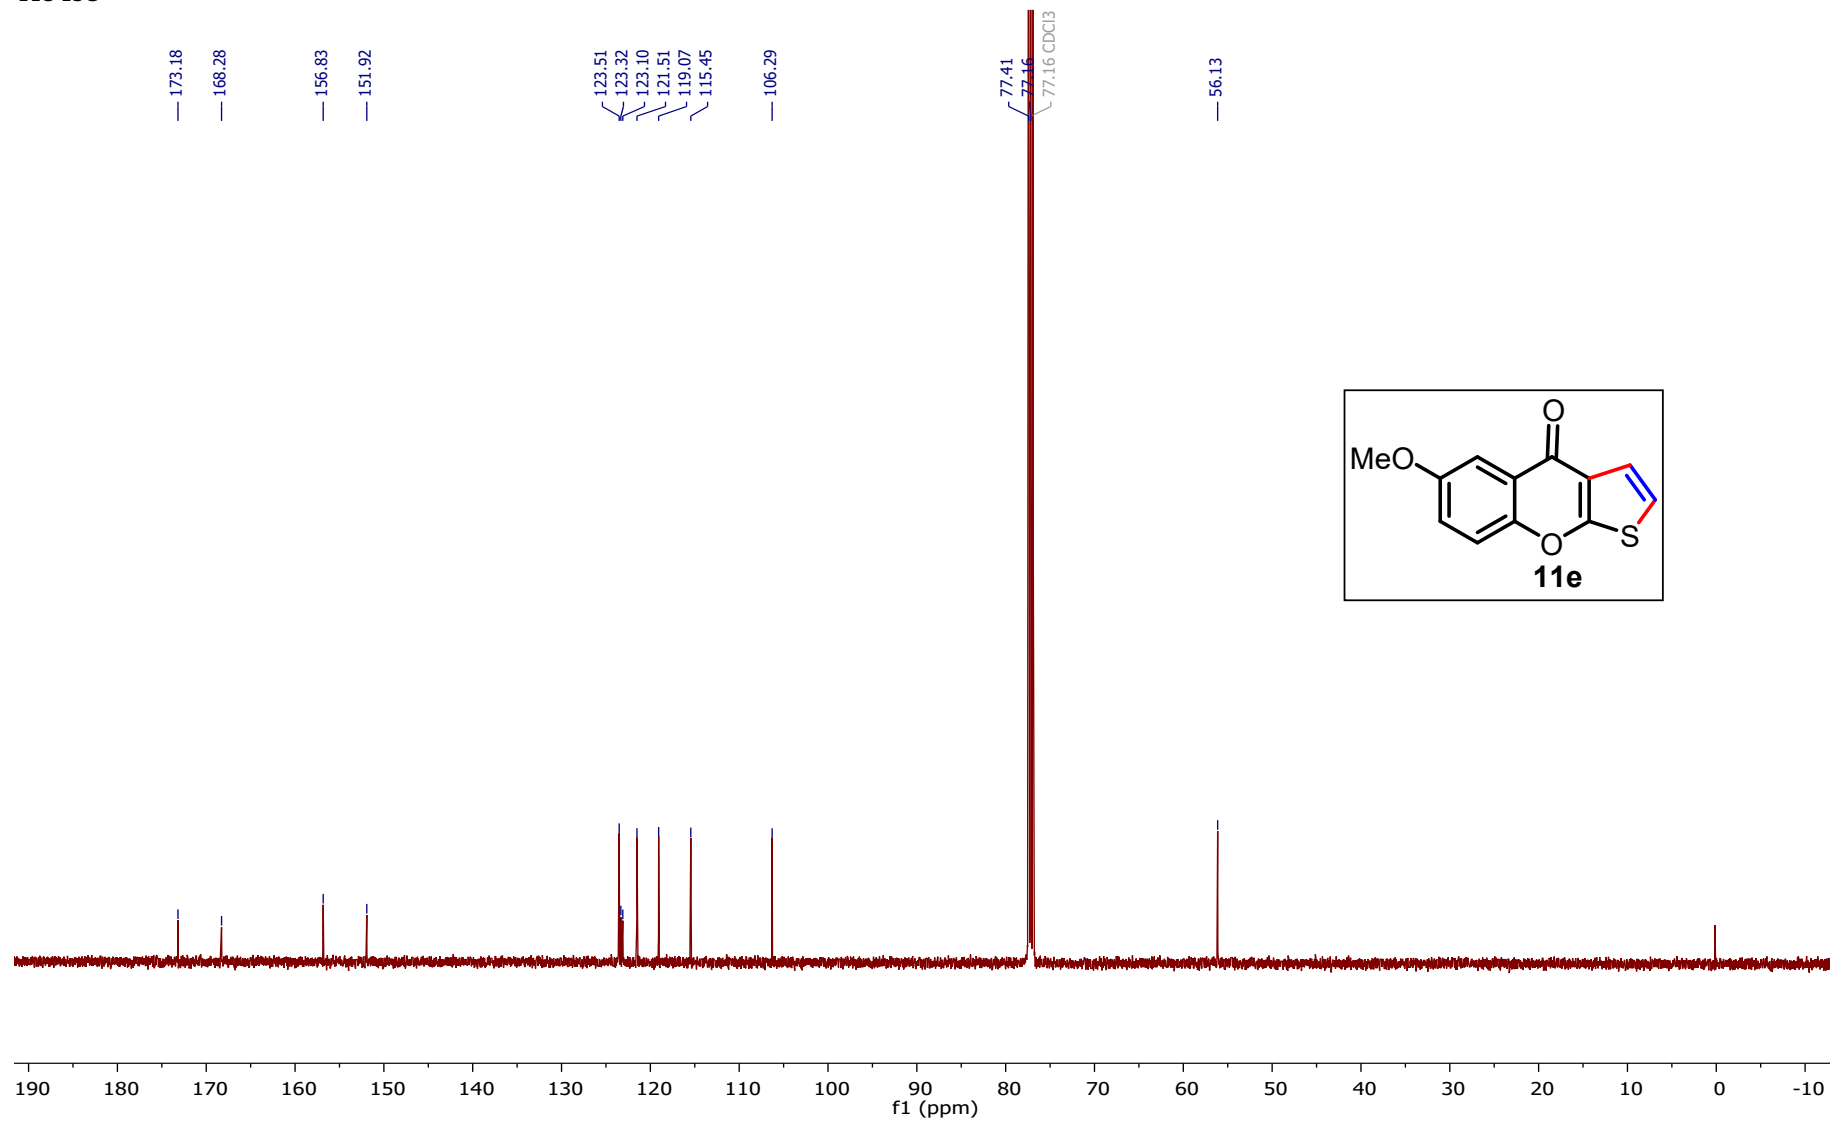

HRMS of compound 11e

|             |                             |                        |         |                 |                                 |
|-------------|-----------------------------|------------------------|---------|-----------------|---------------------------------|
| Sample Name | Sample17                    | Position               | P1-B6   | Instrument Name | QTOF                            |
| User Name   | SYSTEM (SYSTEM)             | Inj Vol                | 5       | InjPosition     |                                 |
| Sample Type | Sample                      | IRM Calibration Status | Success | Data Filename   | DK-46.d                         |
| ACQ Method  | DIRECT MASS_POSITIVE_01_1.m | Comment                |         | Acquired Time   | 03-04-2025 11:22:06 (UTC+05:30) |

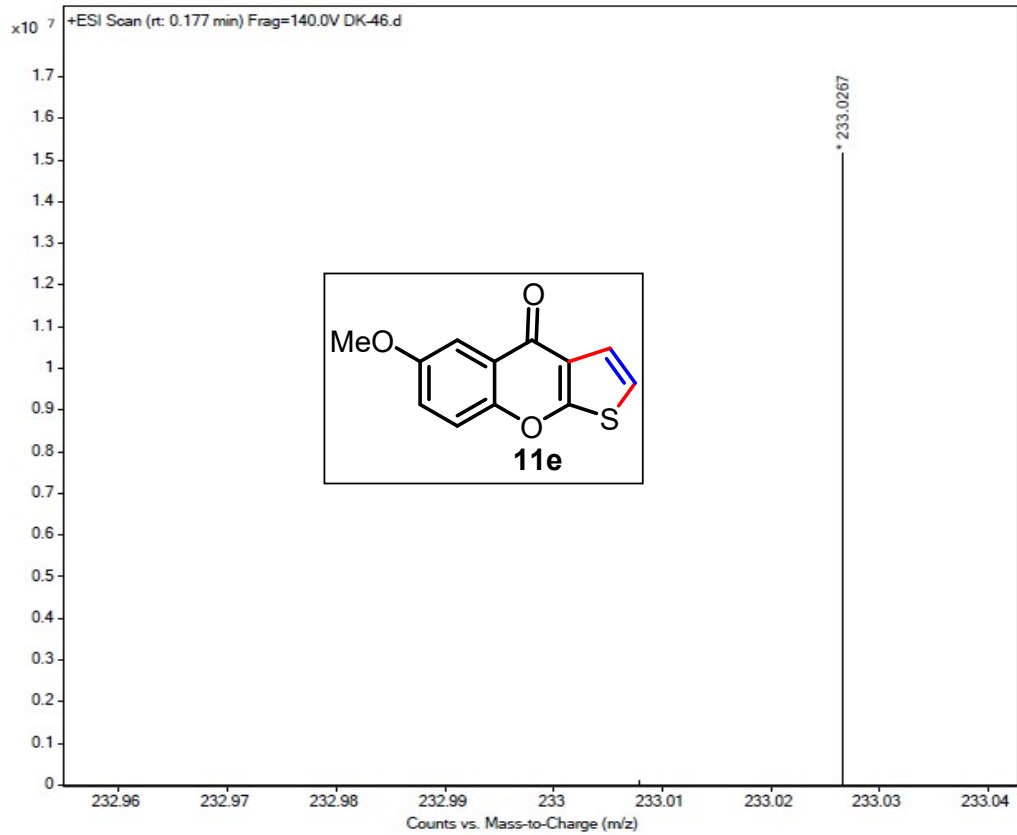

<sup>1</sup>H NMR (400 MHz, CDCl<sub>3</sub>) spectrum of Compound 12a

12a 1H

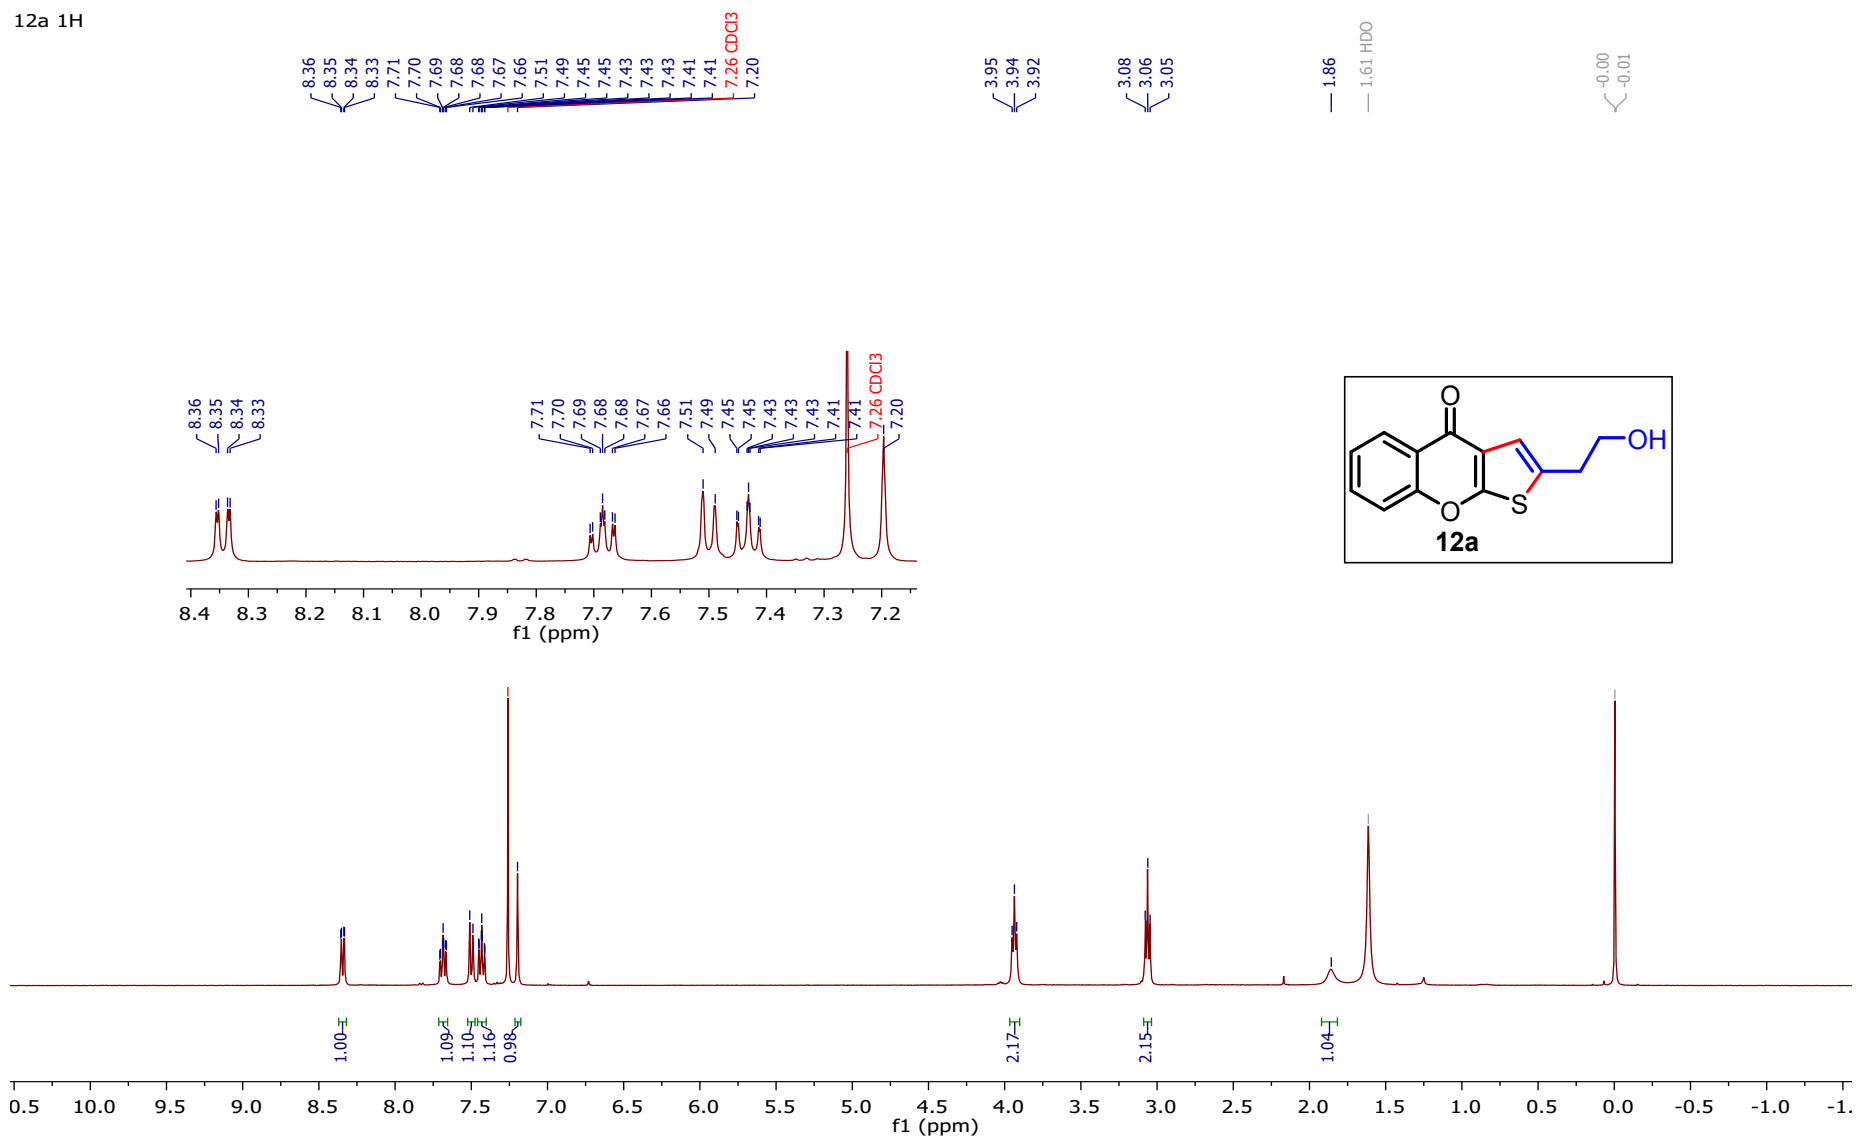

<sup>13</sup>C {<sup>1</sup>H} NMR (125 MHz, CDCl<sub>3</sub>) spectrum of Compound 12a

12a 13C

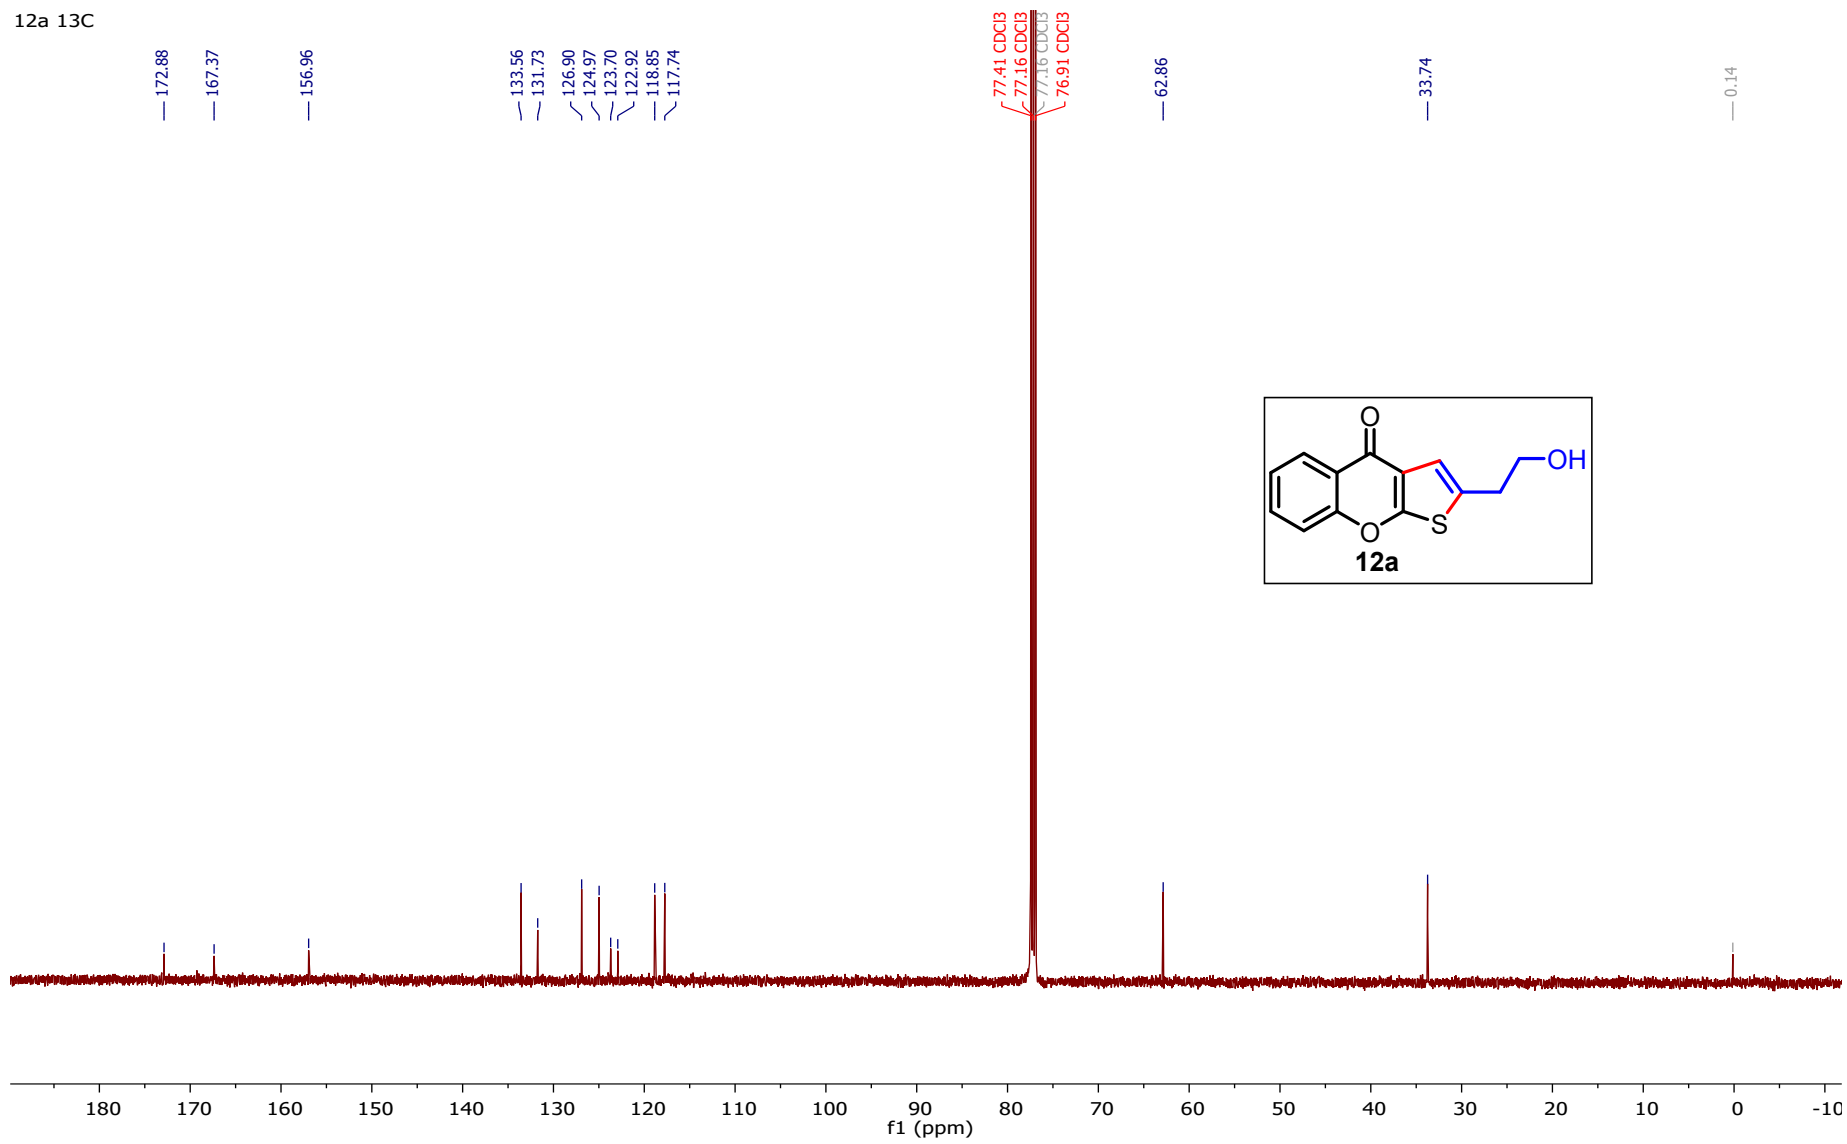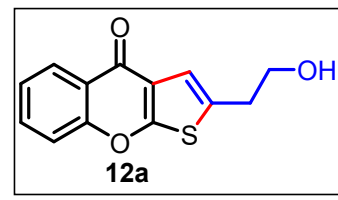

HRMS of compound 12a

**Sample Name**  
**User Name**  
**Sample Type**  
**ACQ Method**

Sample6  
SYSTEM (SYSTEM)  
Sample  
DIRECT MASS\_POSITIVE\_50\_1500.m

**Position**  
**Inj Vol**  
**IRM Calibration Status**  
**Comment**

P1-A6  
5  
Success

**Instrument Name**  
**InjPosition**  
**Data Filename**  
**Acquired Time**

QTOF  
DK-6,d  
10-06-2025 10:47:09 (UTC+05:30)

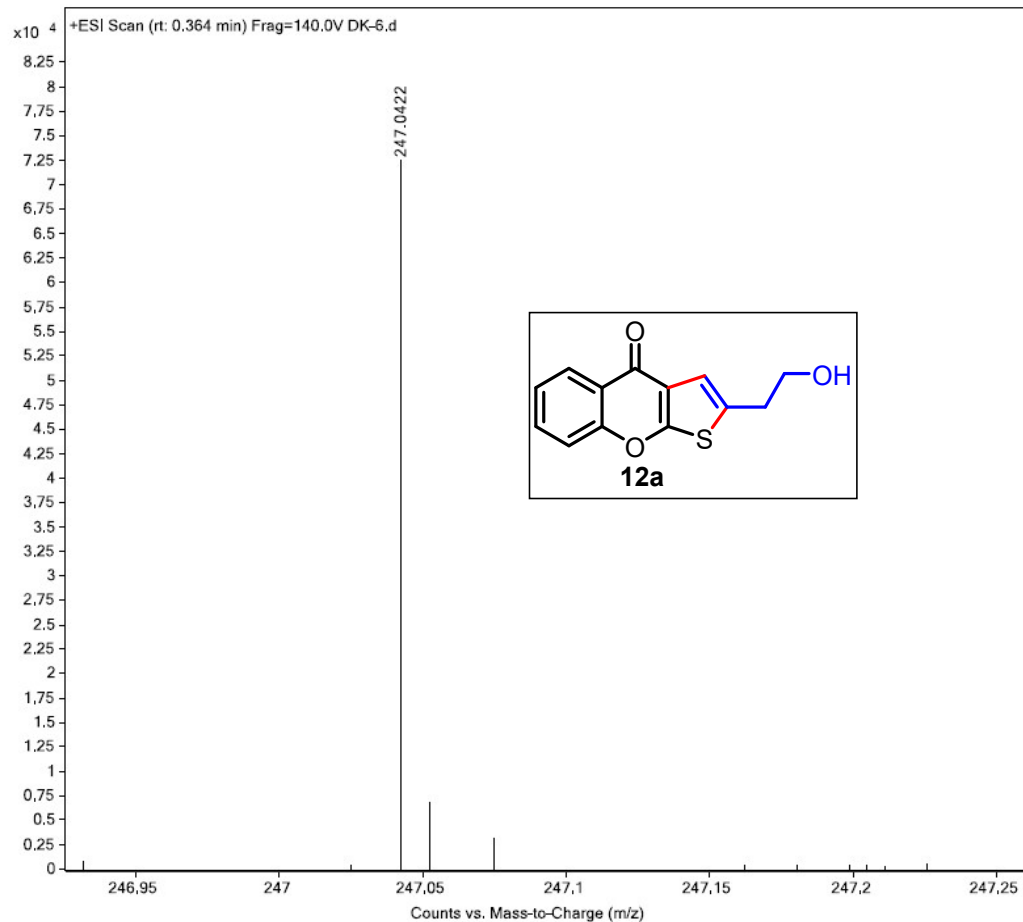

**<sup>1</sup>H NMR (500 MHz, CDCl<sub>3</sub>) spectrum of Compound 12c**

12c 1H

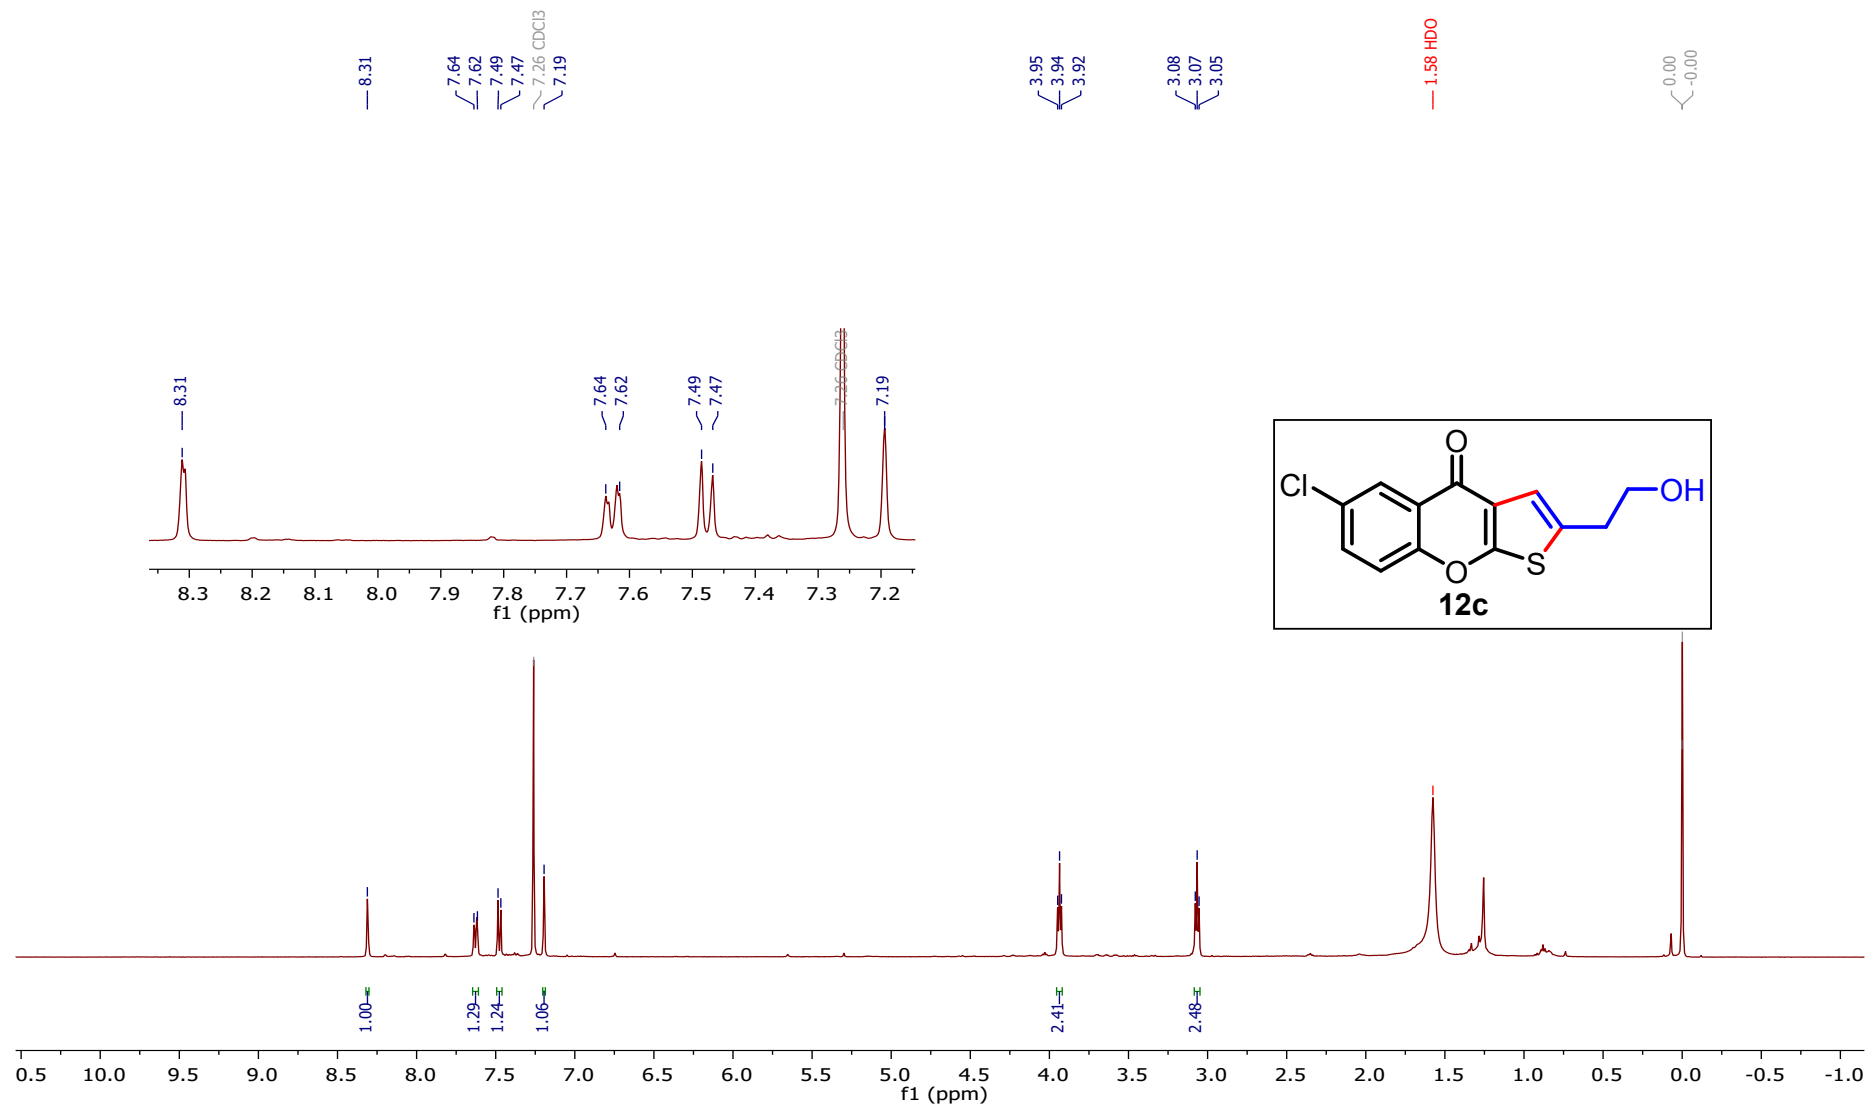

<sup>13</sup>C {<sup>1</sup>H} NMR (125 MHz, CDCl<sub>3</sub>) spectrum of Compound 12c

12c 13C.3.fid — ATK-DF-C-1-13C

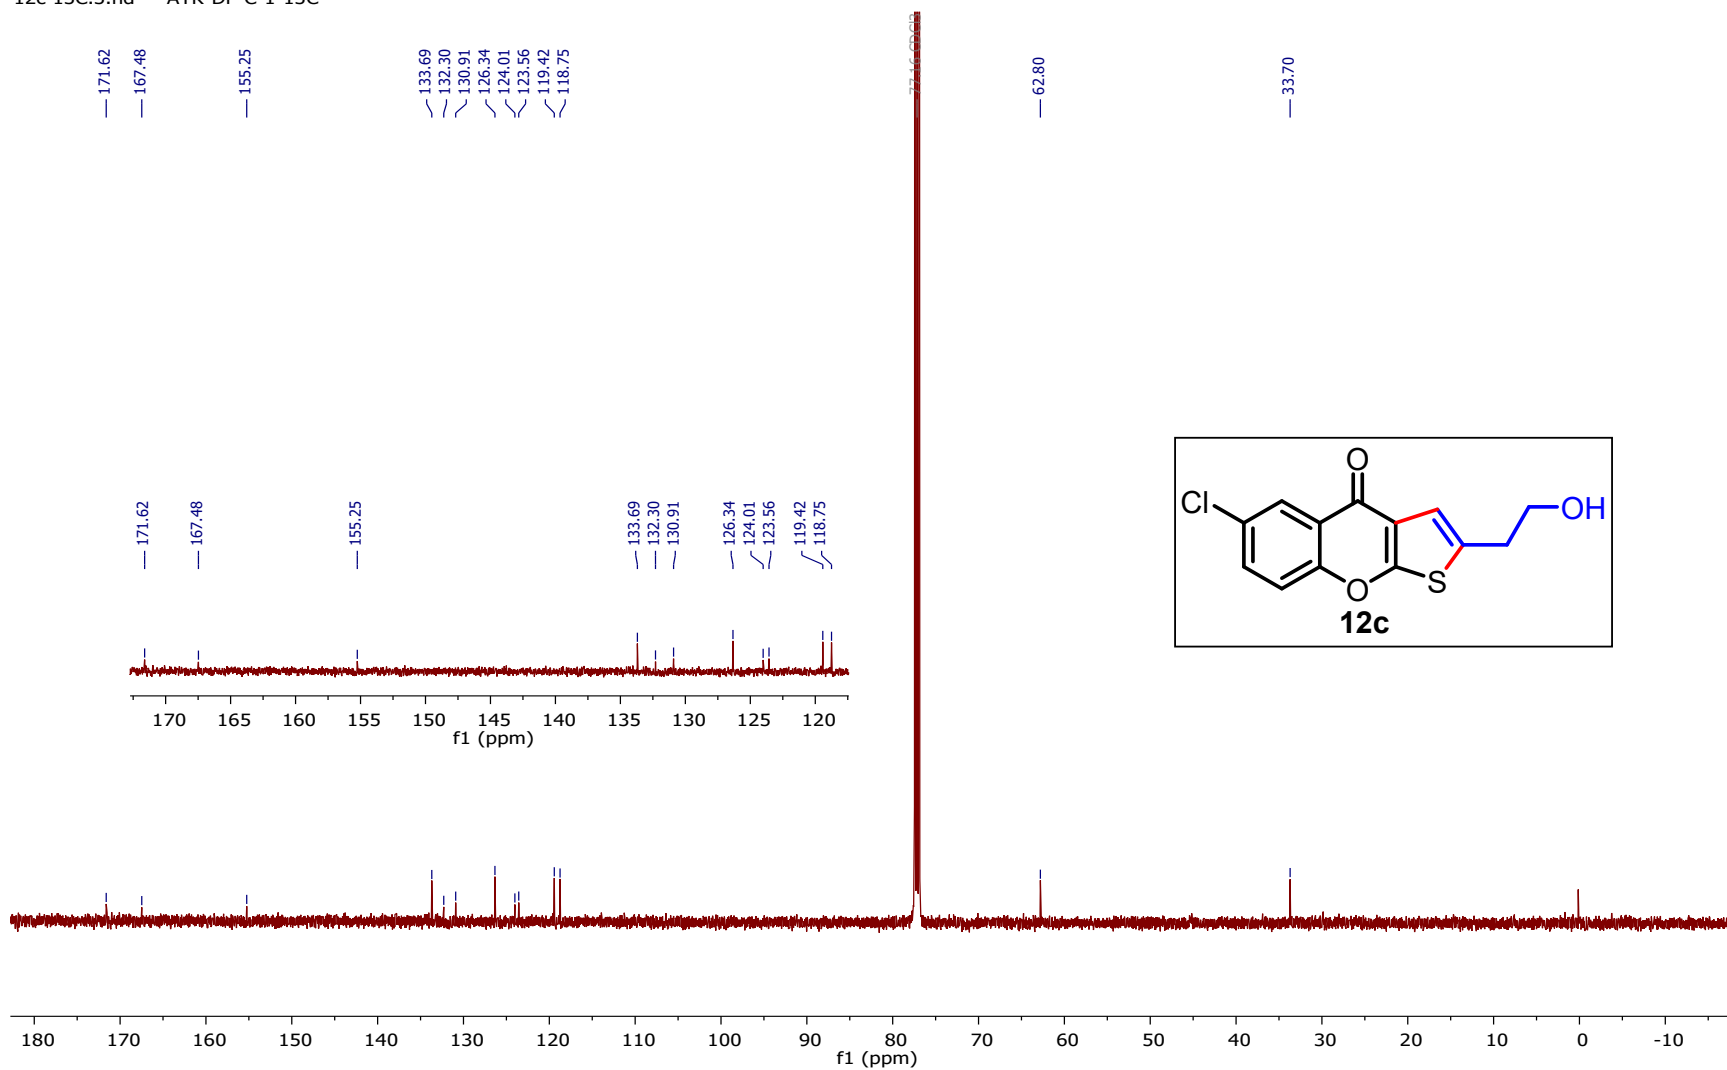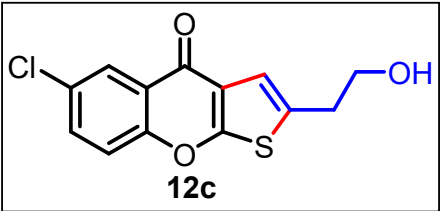

HRMS of compound 12c

Sample Name  
User Name  
Sample Type  
ACQ Method

Sample33  
SYSTEM (SYSTEM)  
Sample  
DIRECT MASS\_POSITIVE\_01\_1.m

Position  
Inj Vol  
IRM Calibration Status  
Comment

P1-C11  
5  
Success

Instrument Name  
InjPosition  
Data Filename  
Acquired Time

QTOF  
DF-C.d  
28-08-2025 12:28:06 (UTC+05:30)

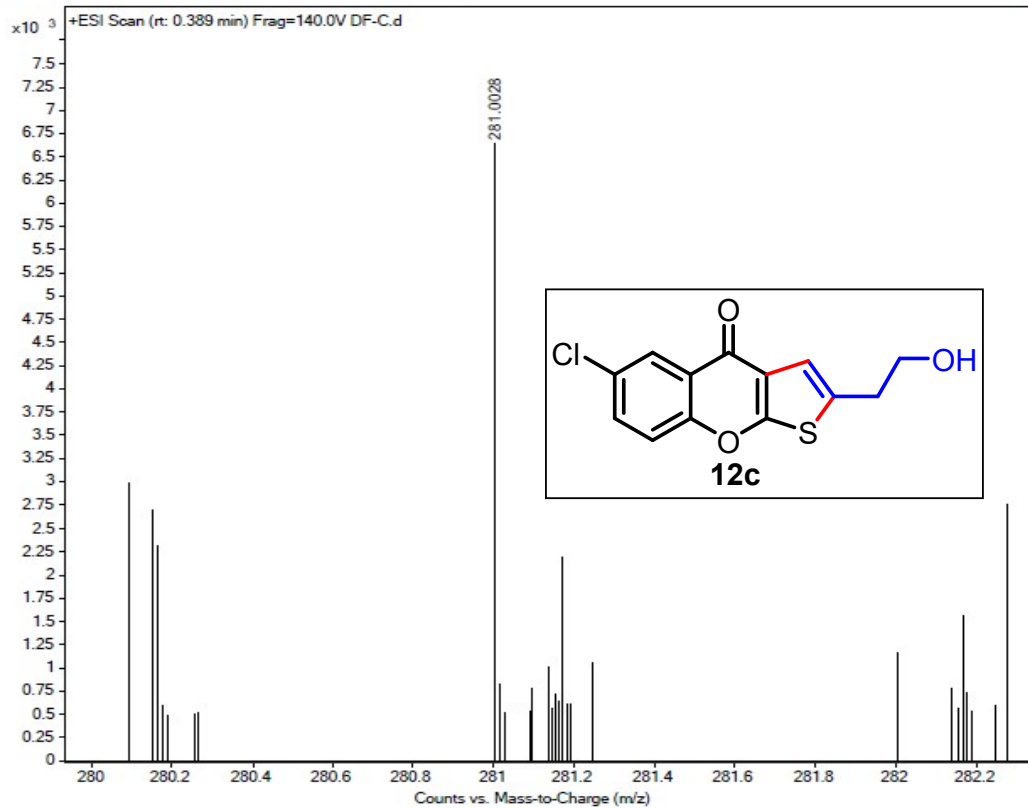

$^1\text{H}$  NMR (500 MHz,  $\text{CDCl}_3$ ) spectrum of Compound 12d

12d 1H.1.fid — ATK-DK-DF-2-1H

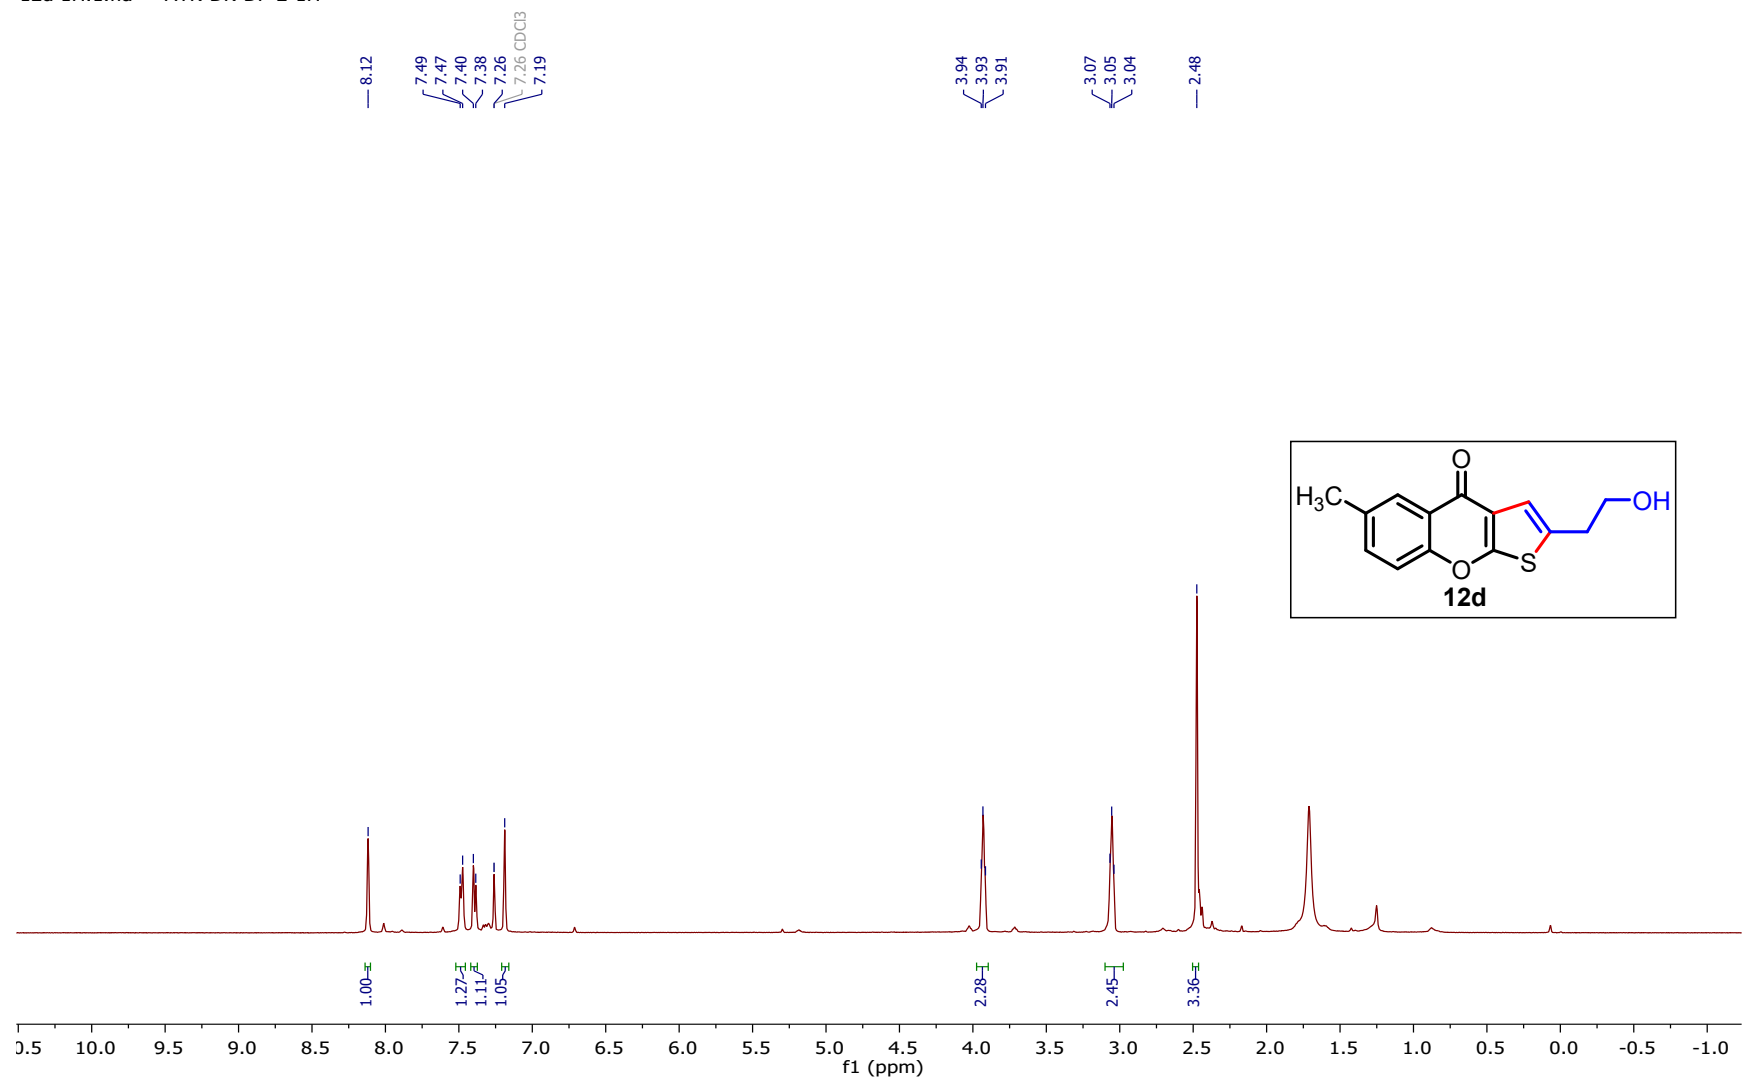

<sup>13</sup>C {<sup>1</sup>H} NMR (125 MHz, CDCl<sub>3</sub>) spectrum of Compound 12d

12d 13C

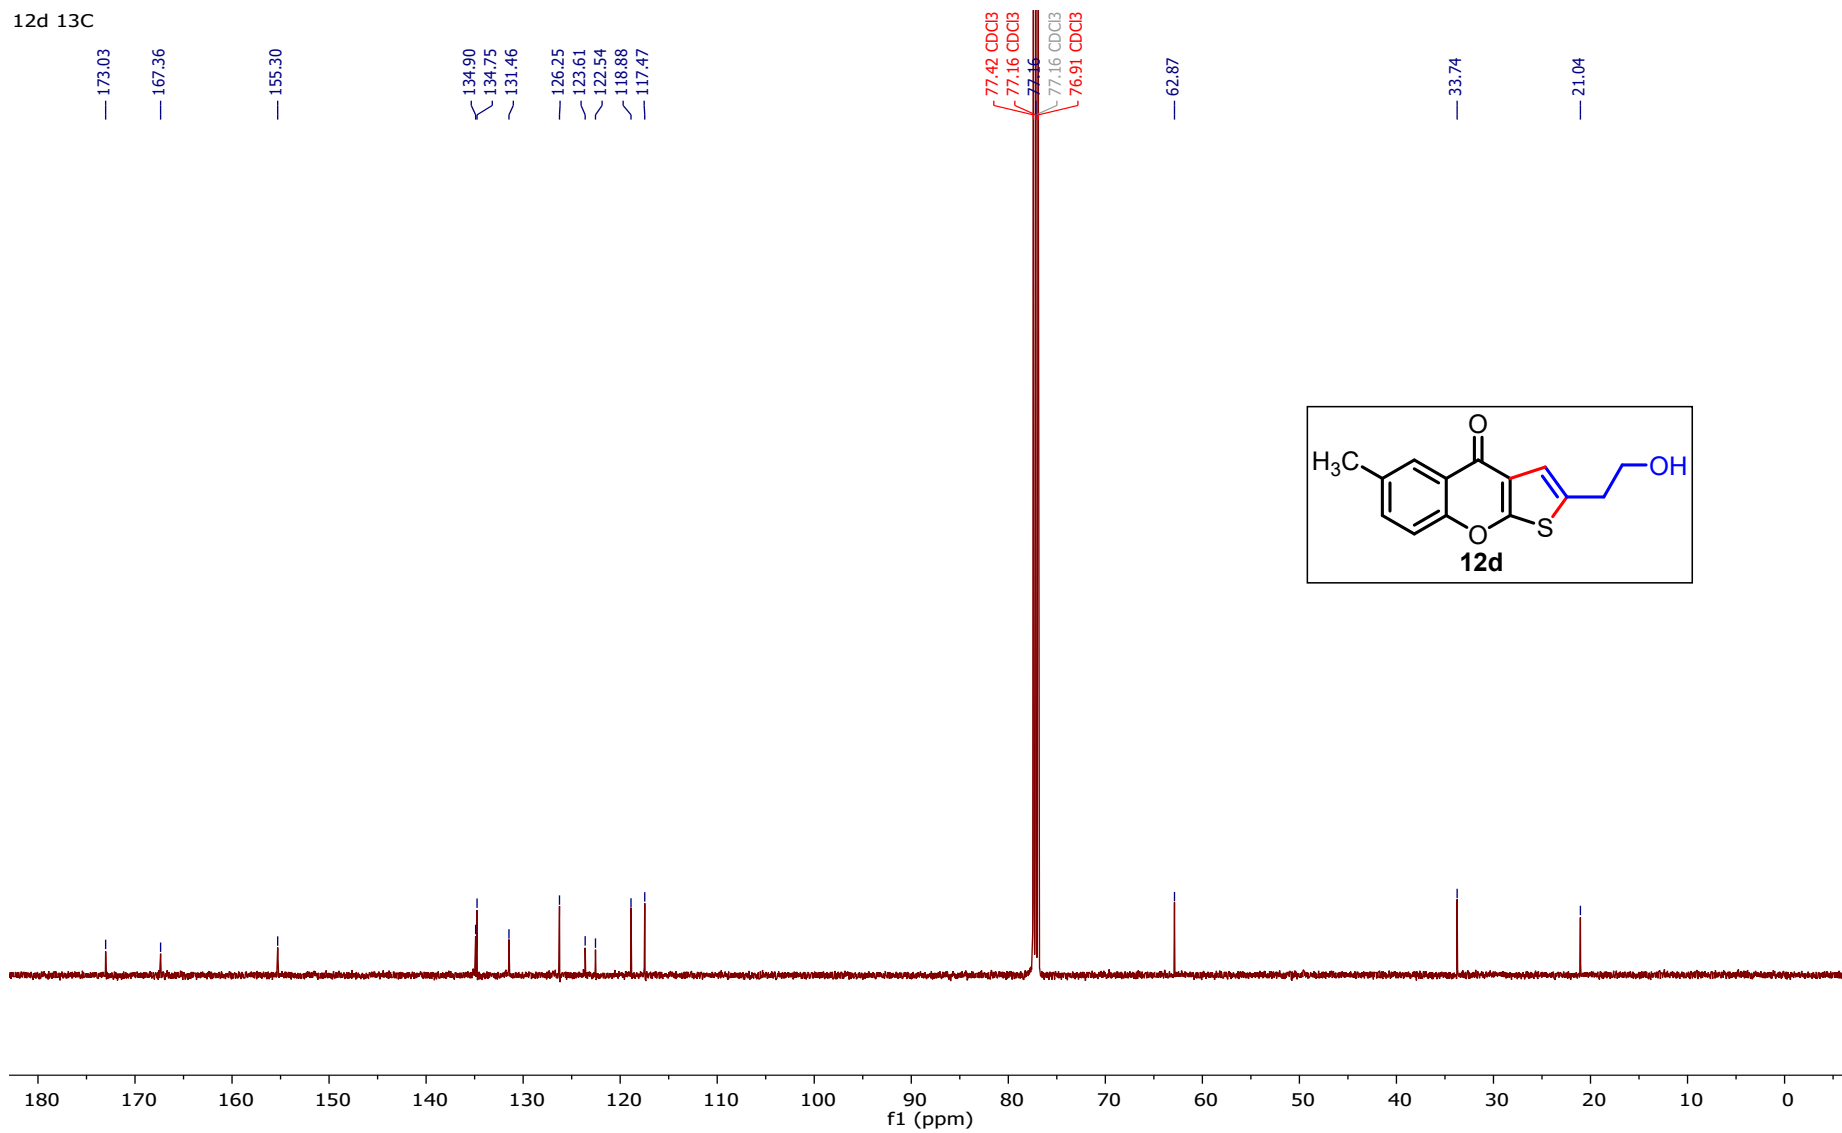

HRMS of compound 12d

Sample Name  
User Name  
Sample Type  
ACQ Method

SYSTEM (SYSTEM)  
Sample  
DIRECT MASS\_POSITIVE\_01\_1.m

Position  
Inj Vol  
IRM Calibration Status  
Comment

P1-A5  
5  
Success

Instrument Name  
InjPosition  
Data Filename  
Acquired Time

QTOF  
DF-2,d  
29-07-2025 15:01:01 (UTC+05:30)

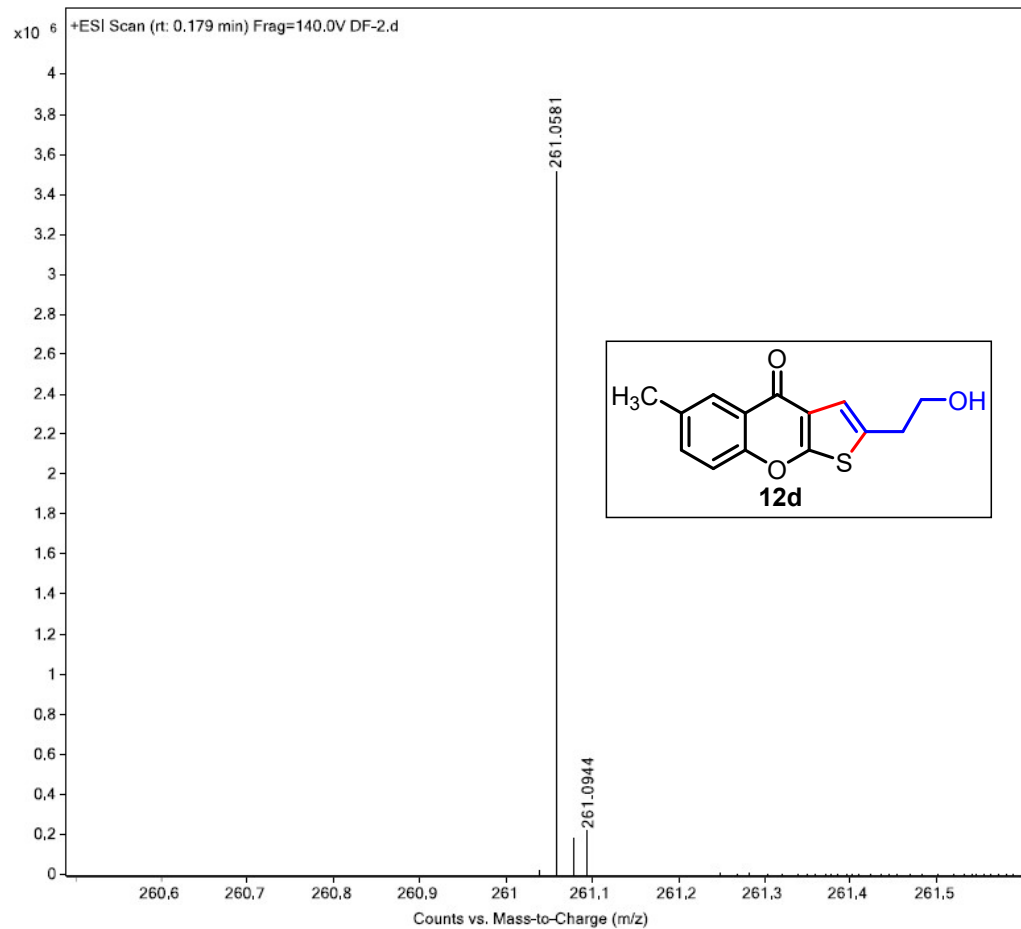

<sup>1</sup>H NMR (400 MHz, CDCl<sub>3</sub>) spectrum of Compound 12e

12e 1H

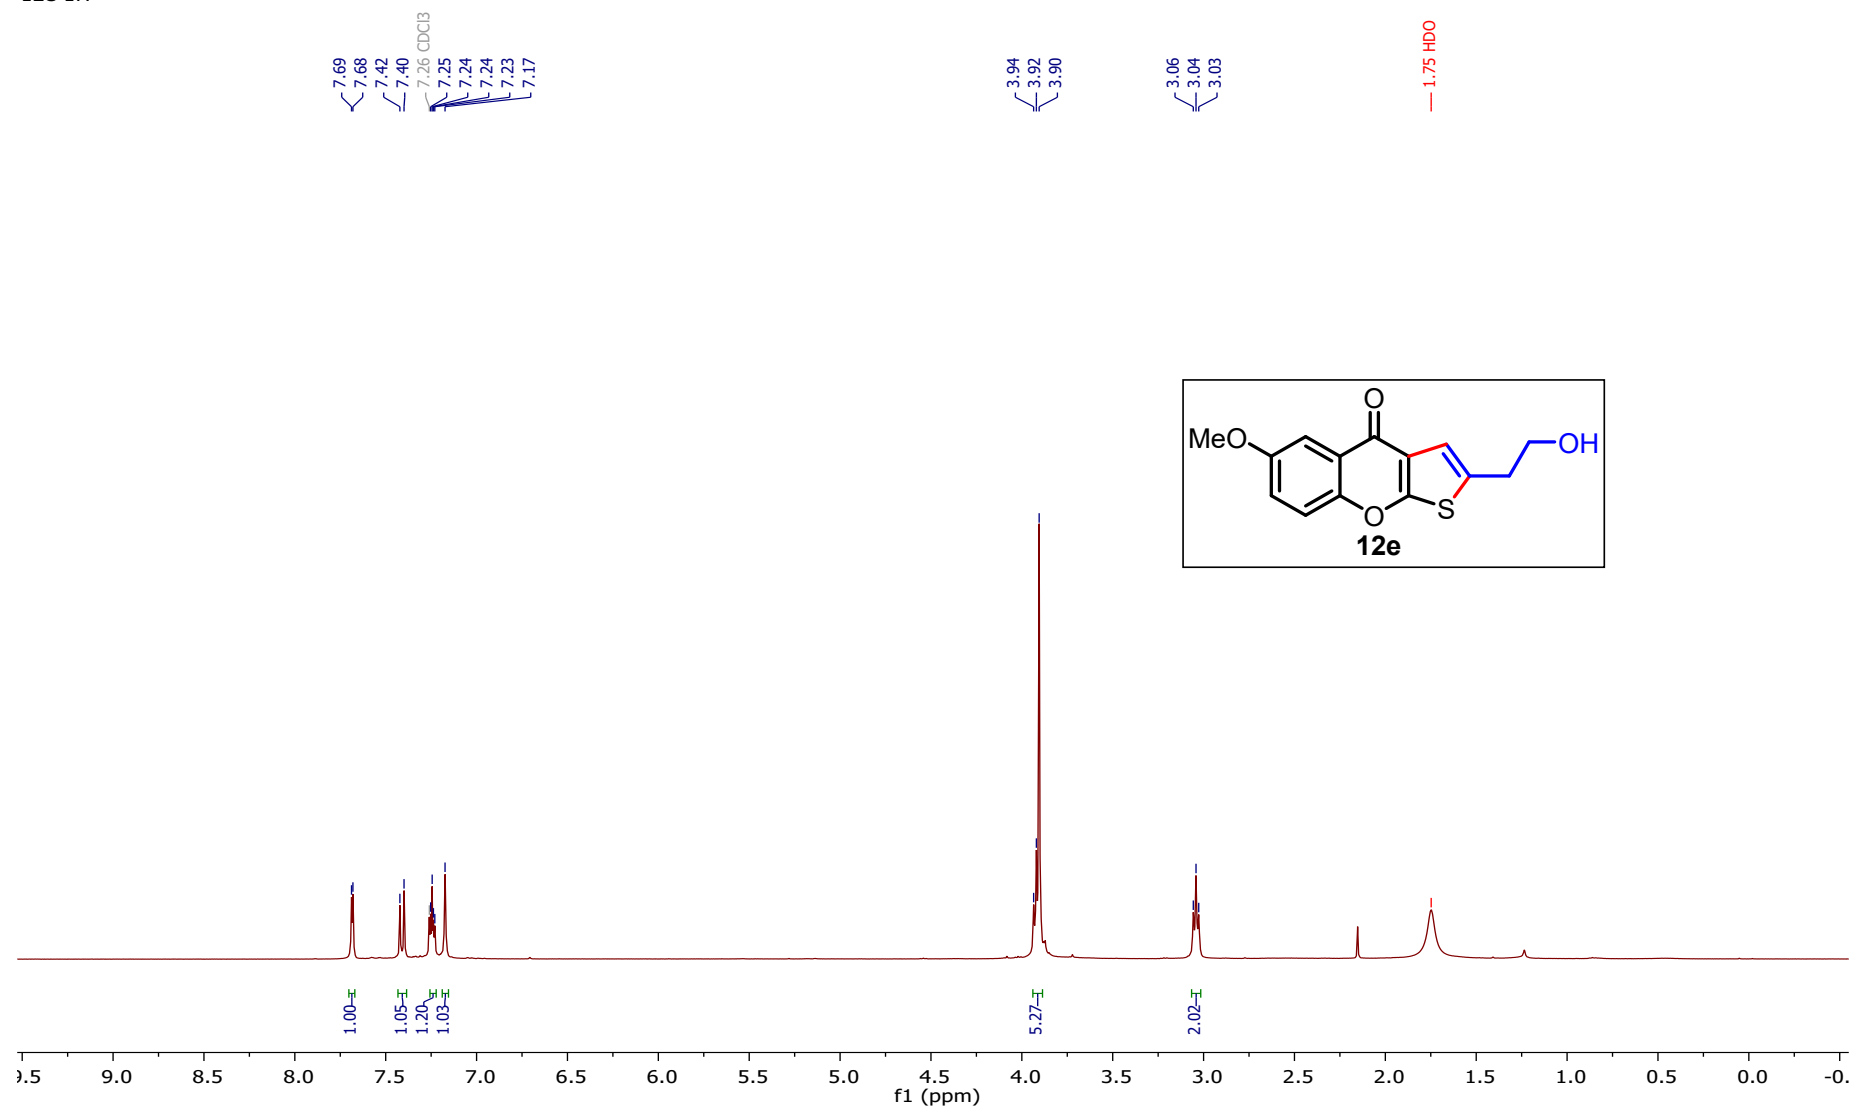

**<sup>13</sup>C {<sup>1</sup>H} NMR (125 MHz, CDCl<sub>3</sub>) spectrum of Compound 12e**

12e 13C

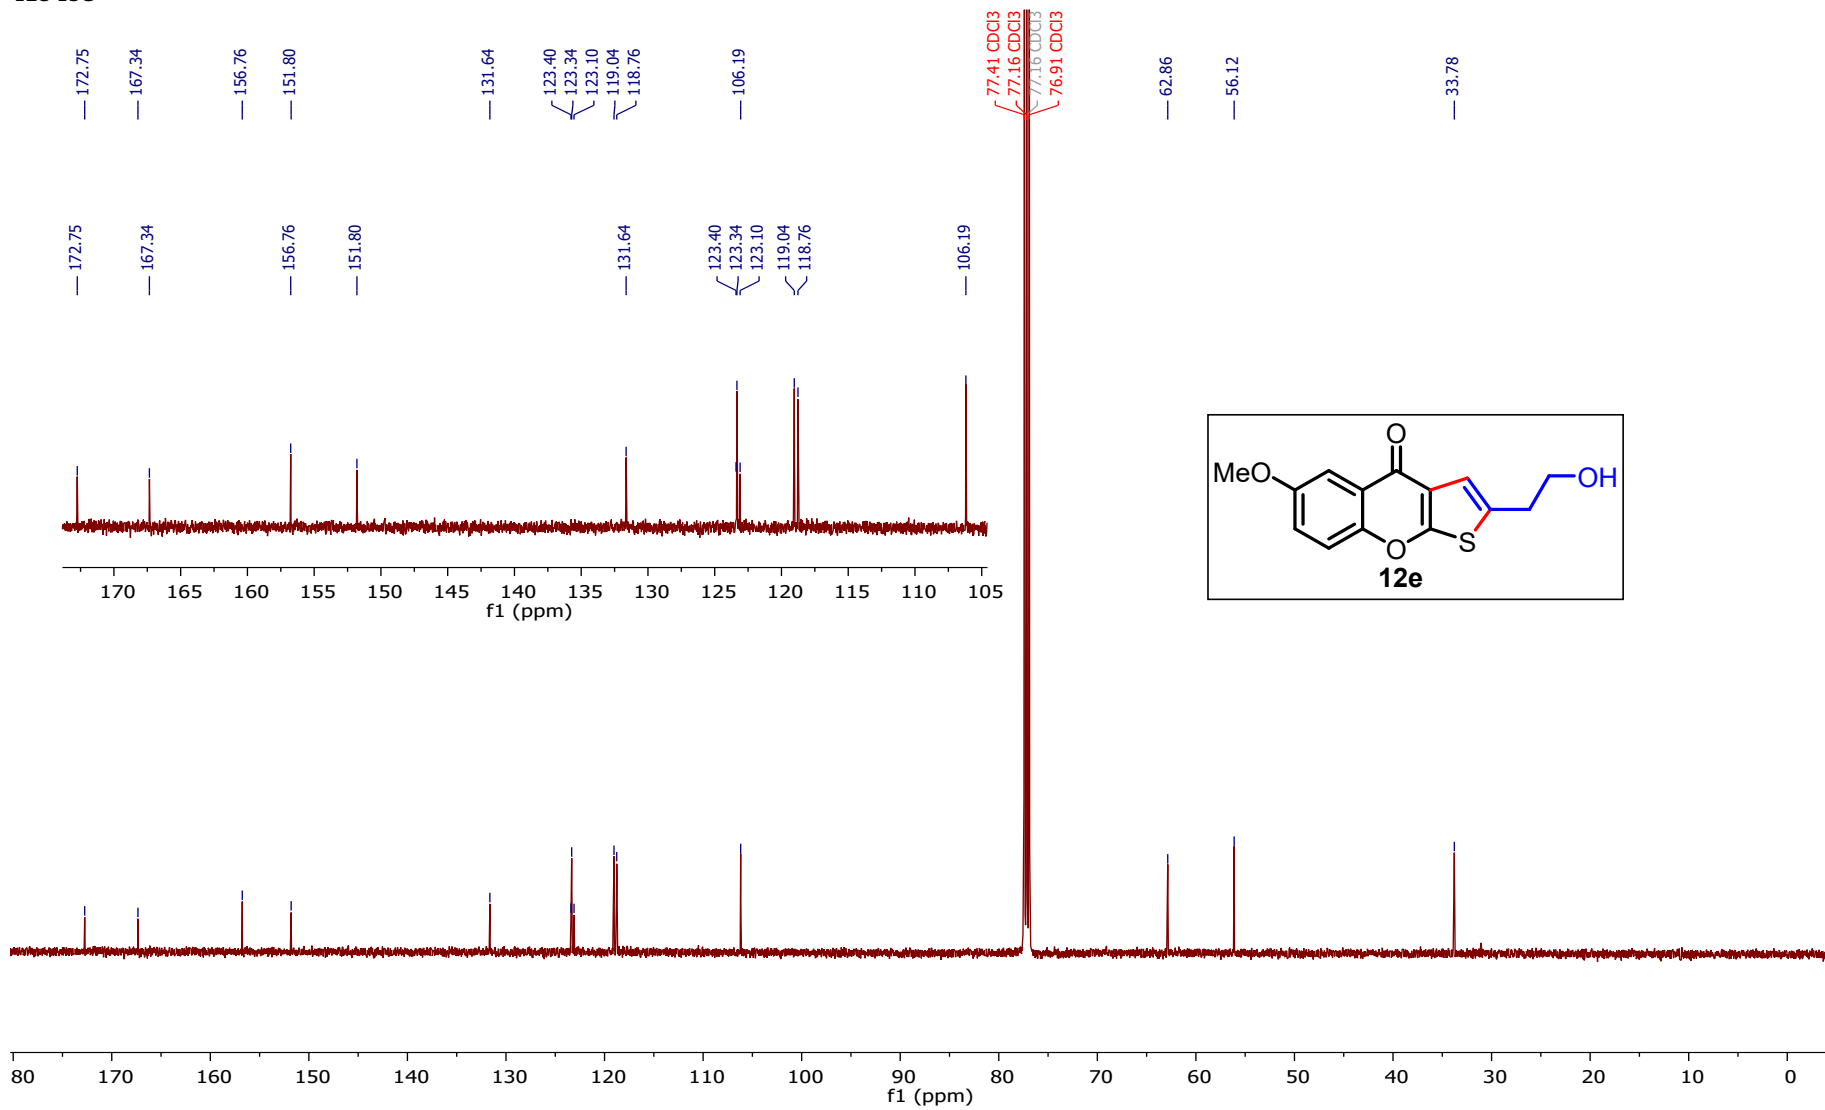

HRMS of compound 12e

**Sample Name**  
**User Name**  
**Sample Type**  
**ACQ Method**

Sample5  
SYSTEM (SYSTEM)  
Sample  
DIRECT MASS\_POSITIVE\_50\_1500.m

**Position**  
**Inj Vol**  
**IRM Calibration Status**  
**Comment**

P1-A5  
5  
Success

**Instrument Name**  
**InjPosition**  
**Data Filename**  
**Acquired Time**

QTOF  
DF-3,d  
10-06-2025 10:40:04 (UTC+05:30)

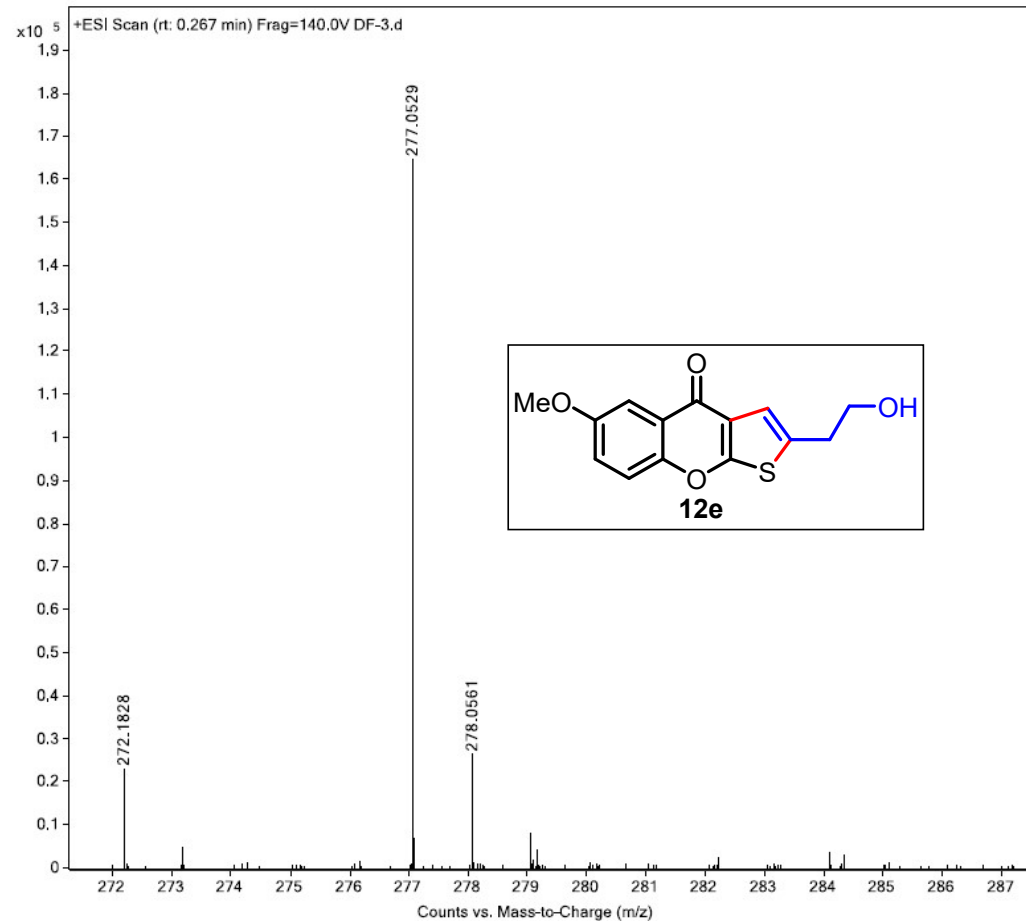

# IR Spectrum of the CuO NPs before reaction (pure)

PerkinElmer Spectrum IR Version 10.6.1  
10 March 2026 21:33

Analyst Date  
Date

Analyst  
10 March 2026 21:33

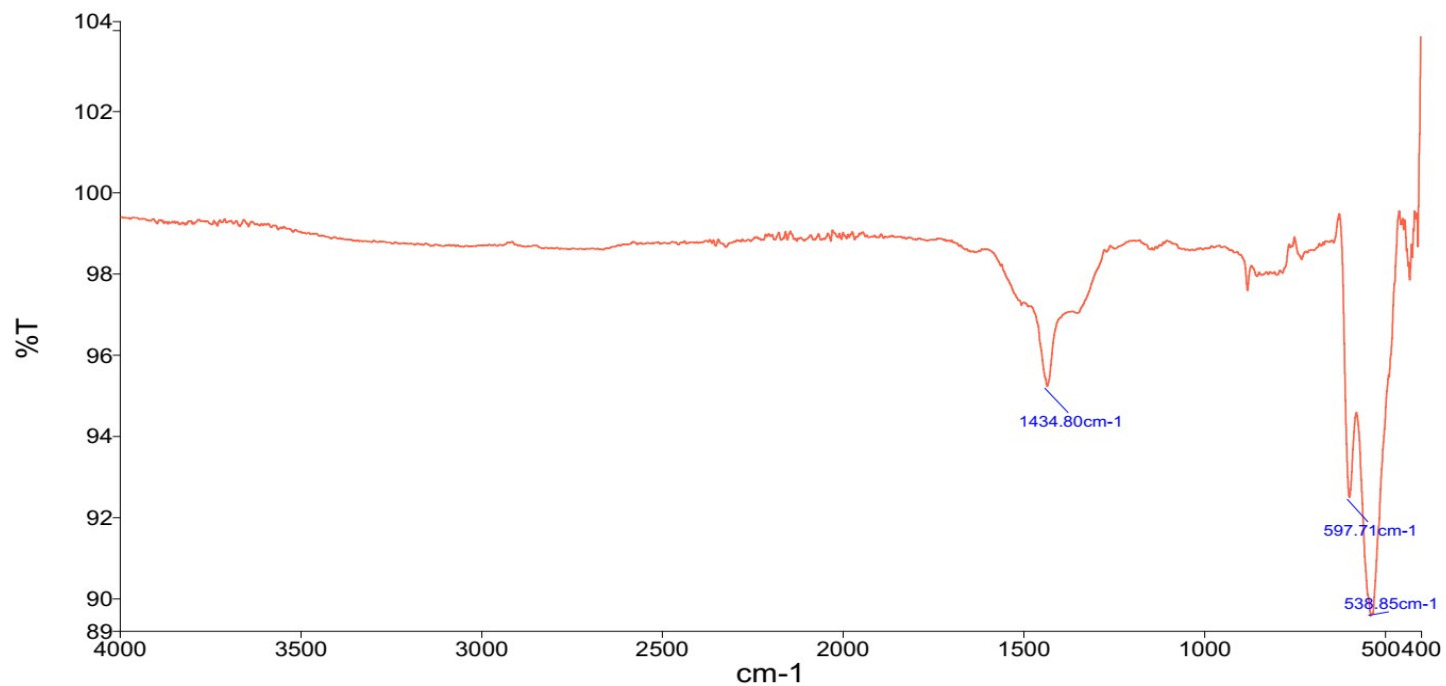

Analyst 30448\_1\_1 Sample 30448 By Analyst Date Tuesday, March 10 2026

| Source Spectra Results |                 |
|------------------------|-----------------|
| Spectrum Name          | Number Of Peaks |
| Analyst 30448_1_1      | 3               |

## IR Spectrum of the CuO NPs during reaction

PerkinElmer Spectrum IR Version 10.6.1  
10 March 2026 21:45

Analyst  
Date

Analyst  
10 March 2026 21:45

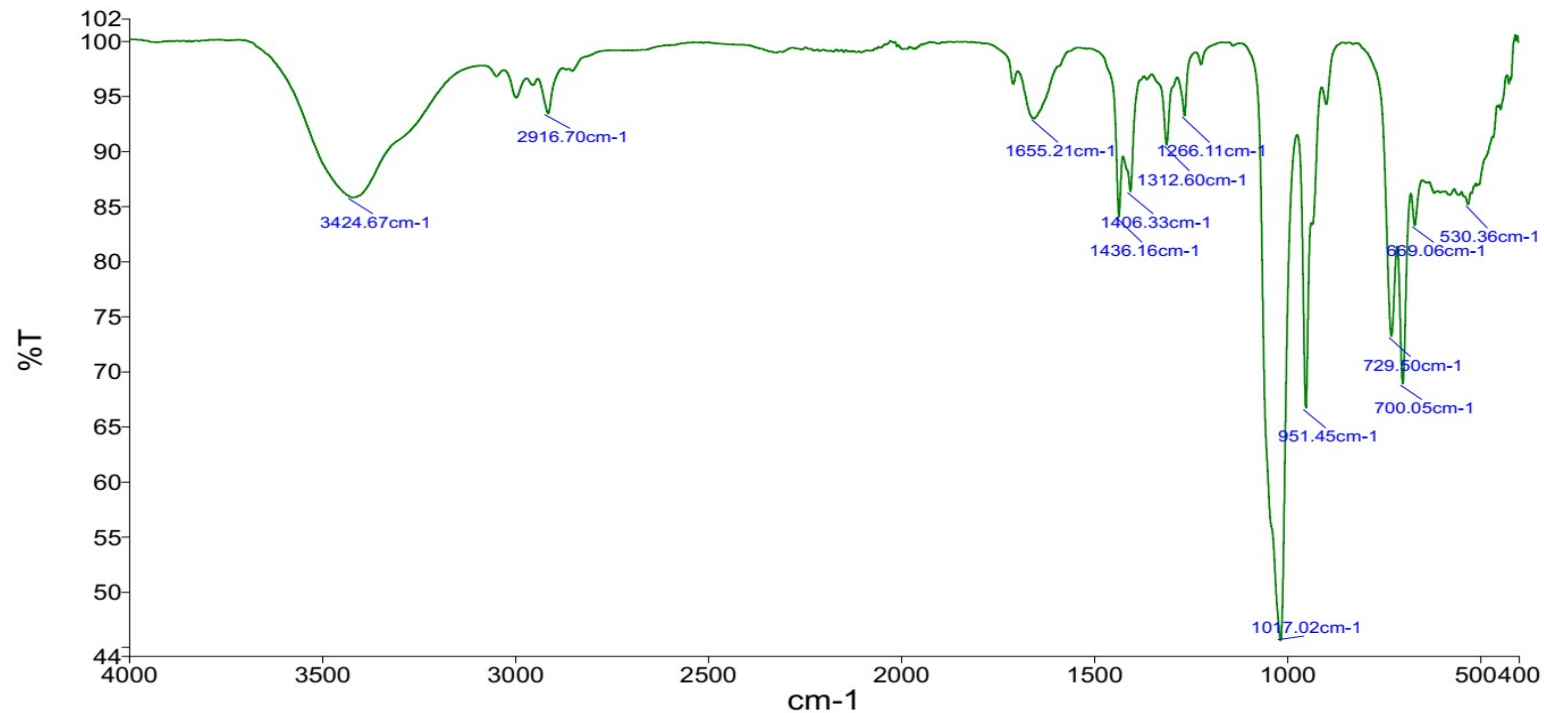

— Analyst 30450\_1\_1 Sample 30450 By Analyst Date Tuesday, March 10 2026

| Source Spectra Results |                 |
|------------------------|-----------------|
| Spectrum Name          | Number Of Peaks |
| Analyst 30450_1_1      | 13              |

## IR Spectrum of the CuO NPs after the reaction

PerkinElmer Spectrum IR Version 10.6.1  
12 March 2026 12:24

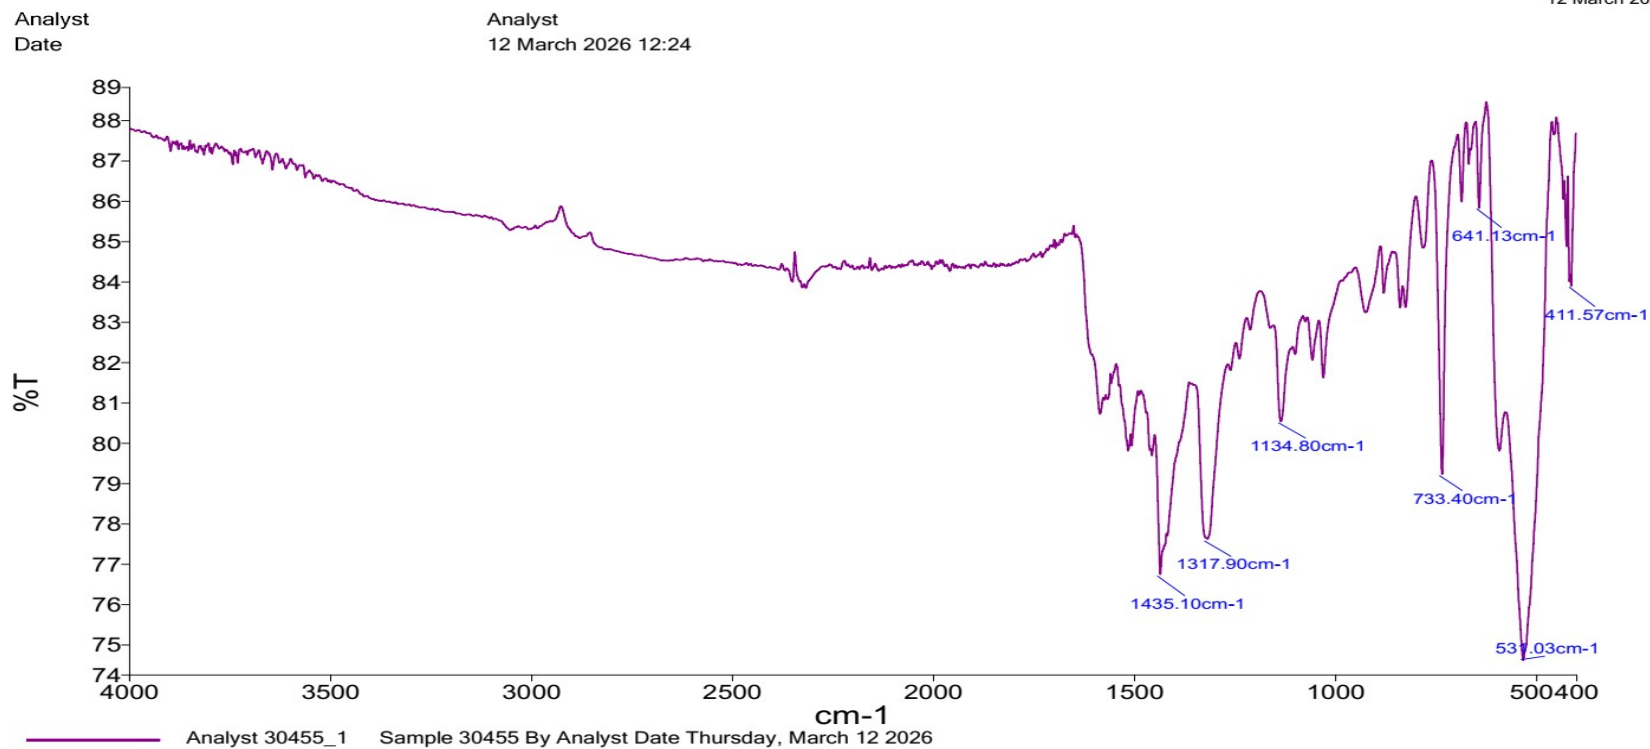

| Source Spectra Results |                 |
|------------------------|-----------------|
| Spectrum Name          | Number Of Peaks |
| Analyst 30455_1        | 7               |

### S4: Detailed Stepwise Mechanism.

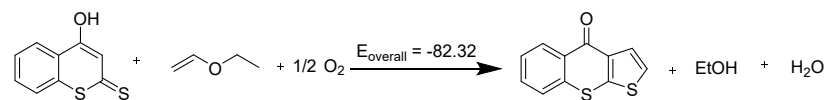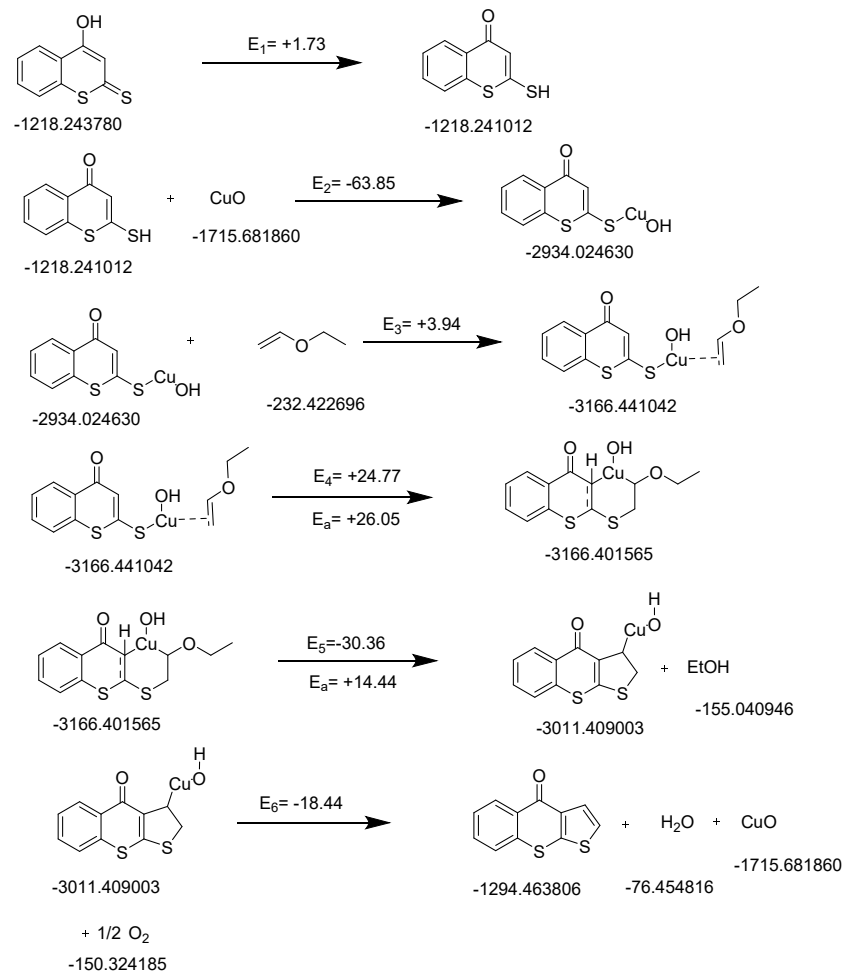

Alternative pathway of the reaction mechanism.

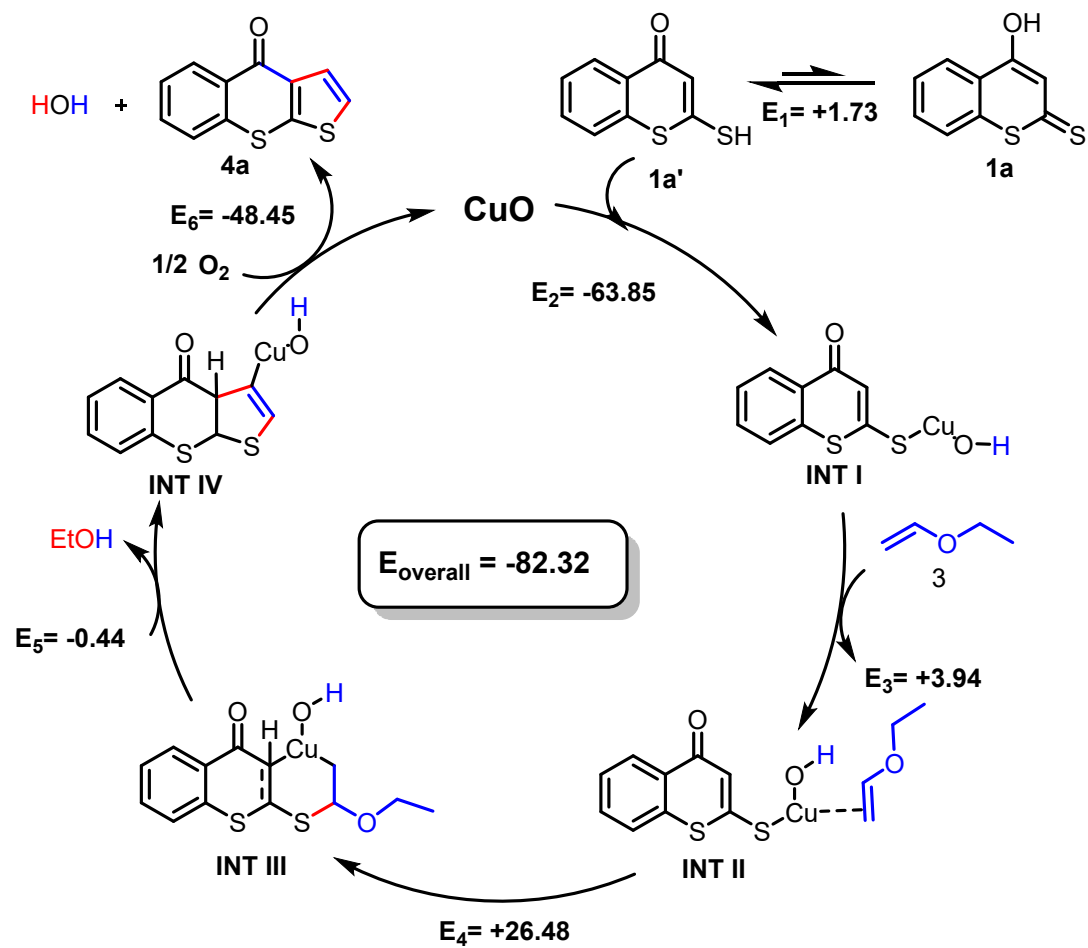

## ESI Quantum Chemical Analysis

Gaussian 16.0 software<sup>3</sup> was employed to perform quantum chemical analysis. All the 3D structures (given in Scheme 5 in the manuscript) were optimized using density functional [B3LYP/6 311+G(d,p)]<sup>1,2</sup> level of theory. The analytical frequencies for all the species were obtained to establish the character of the saddle points along the reaction path (0 to negative frequencies for all minima and one negative frequency for the TS). Free energy corrected absolute values are employed in the calculation of  $\Delta G$  values for all individual reactions along the reaction path. The activation energy ( $E_a$ ) for the C-S and two C-C bond formations from the intermediate to give the final products has been estimated using Berny optimisation procedures (OPT=TS option).

| <b>Codes</b>           | <b>Energy values (in Hartrees)</b>        |
|------------------------|-------------------------------------------|
| <b>1a</b>              | -1218.243780                              |
| <b>1a'</b>             | -1218.241012                              |
| <b>3</b>               | -232.422696                               |
| <b>CuO</b>             | -1715.681860                              |
| <b>INT I</b>           | -2934.024630                              |
| <b>INT II</b>          | -3166.441042                              |
| <b>INT III</b>         | -3166.401565                              |
| <b>INT IV</b>          | -3011.409003                              |
| <b>H<sub>2</sub>O</b>  | -76.454816                                |
| <b>EtOH</b>            | -155.040946                               |
| <b>½ O<sub>2</sub></b> | -75.162095 (O <sub>2</sub> : -150.324185) |
| <b>TS I</b>            | -3166.399531                              |
| <b>TS II</b>           | -3166.378543                              |

**1a**

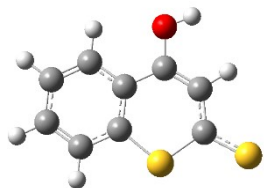

0 1

|   |             |             |             |
|---|-------------|-------------|-------------|
| C | -3.15376800 | -1.30941700 | -0.00037100 |
| C | -1.83650200 | -1.74016500 | -0.00073700 |
| C | -0.78825000 | -0.80899900 | -0.00022400 |
| C | -1.07505900 | 0.57137900  | 0.00025500  |
| C | -2.42165700 | 0.98574900  | 0.00077700  |
| C | -3.44917700 | 0.05883900  | 0.00063300  |
| H | -3.95487300 | -2.03956800 | -0.00087300 |
| H | -1.60950800 | -2.80031000 | -0.00143000 |
| C | 0.00038900  | 1.54504100  | -0.00031000 |
| H | -2.63848800 | 2.04524800  | 0.00129500  |
| H | -4.47960500 | 0.39324800  | 0.00129200  |
| C | 1.33335400  | 1.24845200  | -0.00036400 |
| C | 1.91816400  | -0.05351800 | -0.00004500 |
| O | -0.42592600 | 2.83272800  | -0.00043700 |
| S | 3.55696500  | -0.33658900 | 0.00025100  |
| S | 0.85213800  | -1.45976700 | 0.00020100  |
| H | 0.33067500  | 3.43080000  | -0.00097700 |
| H | 2.04859300  | 2.06627000  | -0.00070400 |

**1a'**

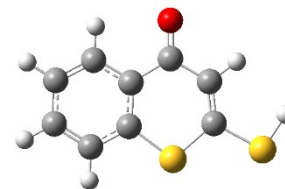

0 1

|   |             |             |             |
|---|-------------|-------------|-------------|
| C | 3.18440900  | -1.29423300 | -0.00128900 |
| C | 1.86328900  | -1.71142000 | -0.00038100 |
| C | 0.83017400  | -0.76177600 | 0.00040400  |
| C | 1.12269000  | 0.61081600  | 0.00033600  |
| C | 2.47159800  | 1.00528200  | -0.00066400 |
| C | 3.49268100  | 0.07149300  | -0.00142600 |
| H | 3.97733700  | -2.03336700 | -0.00194700 |
| H | 1.62531600  | -2.76939400 | -0.00034300 |
| C | 0.08199800  | 1.67777100  | 0.00075700  |
| H | 2.67584000  | 2.06882000  | -0.00079100 |
| H | 4.52681700  | 0.39512500  | -0.00217100 |
| C | -1.32352100 | 1.28832900  | -0.00086300 |
| C | -1.80307000 | 0.02373300  | -0.00009300 |
| O | 0.39648900  | 2.86504000  | 0.00158800  |
| S | -3.53259500 | -0.39438700 | -0.00229100 |
| S | -0.81184400 | -1.42091600 | 0.00277200  |
| H | -2.01550900 | 2.12363600  | -0.00285300 |
| H | -3.97218400 | 0.87973400  | 0.00702300  |

3

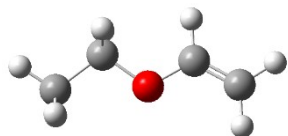

0 1

|   |             |             |             |
|---|-------------|-------------|-------------|
| C | -2.30074600 | -0.35225600 | -0.01357300 |
| H | -2.31642800 | -0.93525400 | -0.93697600 |
| H | -2.31098500 | -1.04377800 | 0.83166600  |
| H | -3.20730600 | 0.25752600  | 0.02698100  |
| C | -1.07472600 | 0.53736700  | 0.03729100  |
| H | -1.05732300 | 1.12619700  | 0.96312200  |
| H | -1.06175100 | 1.23349300  | -0.81113200 |
| O | 0.08792800  | -0.29833800 | -0.01623300 |
| C | 1.28442300  | 0.34752300  | -0.02582300 |
| H | 1.22806400  | 1.43348400  | -0.07796400 |
| C | 2.44948600  | -0.29535100 | 0.01476600  |
| H | 3.37234500  | 0.26701700  | -0.00922100 |
| H | 2.49934200  | -1.37567500 | 0.06742500  |

CuO

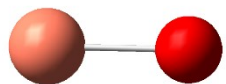

0 2

|    |            |            |             |
|----|------------|------------|-------------|
| Cu | 0.00000000 | 0.00000000 | 0.38212000  |
| O  | 0.00000000 | 0.00000000 | -1.38518600 |

INT I

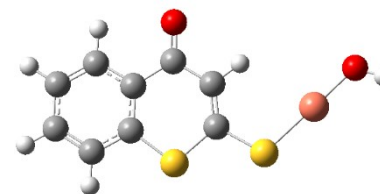

0 2

|    |             |             |             |
|----|-------------|-------------|-------------|
| C  | -4.82043000 | -0.58756300 | -0.01288900 |
| C  | -3.64547700 | -1.32050000 | -0.01046800 |
| C  | -2.40682700 | -0.65929200 | -0.00302700 |
| C  | -2.35124700 | 0.74425100  | 0.00190600  |
| C  | -3.55944700 | 1.46332700  | -0.00067800 |
| C  | -4.77986400 | 0.81279300  | -0.00796700 |
| H  | -5.77254500 | -1.10570100 | -0.01861800 |
| H  | -3.67871600 | -2.40437800 | -0.01429500 |
| C  | -1.08052500 | 1.51702200  | 0.00983100  |
| H  | -3.49381300 | 2.54428900  | 0.00324000  |
| H  | -5.70119600 | 1.38300900  | -0.00988200 |
| C  | 0.18959900  | 0.79059900  | 0.01272000  |
| C  | 0.34845500  | -0.56036300 | 0.00883600  |
| O  | -1.08028300 | 2.74460900  | 0.01415000  |
| S  | 1.90118600  | -1.40052400 | 0.01473800  |
| Cu | 3.46392500  | 0.05050900  | -0.00222900 |
| O  | 4.75157600  | 1.27889100  | -0.02653800 |
| S  | -0.98128000 | -1.70556700 | -0.00079400 |
| H  | 5.67243500  | 0.99598500  | -0.02857600 |
| H  | 1.06573800  | 1.42984300  | 0.01917500  |

INT II

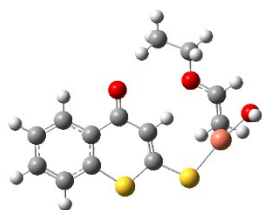

|     |             |             |             |
|-----|-------------|-------------|-------------|
| 0 2 |             |             |             |
| C   | -5.44759600 | -0.04856200 | -0.49867300 |
| C   | -4.43925000 | -0.98599800 | -0.64735800 |
| C   | -3.13375200 | -0.68807300 | -0.22330400 |
| C   | -2.84329600 | 0.56133100  | 0.35041400  |
| C   | -3.88595300 | 1.49417500  | 0.49003800  |
| C   | -5.17197100 | 1.19992100  | 0.07421500  |
| H   | -6.45260800 | -0.28830700 | -0.82696800 |
| H   | -4.65402700 | -1.95258100 | -1.08973700 |
| C   | -1.48839000 | 0.94768400  | 0.82764900  |
| H   | -3.63988000 | 2.44967900  | 0.93647500  |
| H   | -5.96355100 | 1.93071800  | 0.19125300  |
| C   | -0.42080600 | -0.03882800 | 0.78439800  |
| C   | -0.47547200 | -1.27891100 | 0.22851000  |
| O   | -1.27084000 | 2.08044700  | 1.26512100  |
| S   | 0.87697600  | -2.40998600 | 0.13096100  |
| C   | 3.17928400  | 0.99613900  | -1.05704800 |
| C   | 3.02533400  | -0.21090400 | -1.68140800 |
| H   | 3.91053300  | -0.81505600 | -1.83924100 |
| H   | 2.14301200  | -0.41467800 | -2.27473600 |
| Cu  | 2.66878000  | -1.14953000 | 0.32007800  |
| O   | 4.16896000  | -0.44334900 | 1.12917400  |
| H   | 4.09292800  | 1.22386700  | -0.51397900 |
| S   | -1.92678000 | -1.95109700 | -0.49156000 |
| O   | 2.22291500  | 1.90633400  | -1.04772500 |
| C   | 2.43995200  | 3.07885100  | -0.20256300 |
| H   | 2.57135400  | 2.73108400  | 0.82509700  |

|   |            |             |             |
|---|------------|-------------|-------------|
| H | 3.36264700 | 3.56317500  | -0.53628300 |
| C | 1.23964500 | 3.98726600  | -0.33822400 |
| H | 1.09473900 | 4.28688200  | -1.37869400 |
| H | 0.33697800 | 3.49703200  | 0.03039100  |
| H | 1.40573900 | 4.88867000  | 0.25800800  |
| H | 4.25212600 | -0.70503100 | 2.05217200  |
| H | 0.50761000 | 0.28621900  | 1.24112500  |

### INT III

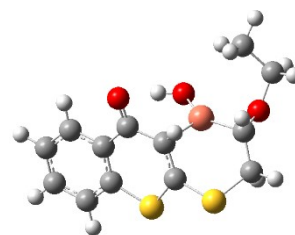

|     |             |             |             |
|-----|-------------|-------------|-------------|
| 0 2 |             |             |             |
| C   | 4.85313300  | -0.34404200 | -0.84832000 |
| C   | 3.91060100  | 0.67480300  | -0.91715600 |
| C   | 2.68676400  | 0.52203700  | -0.25716500 |
| C   | 2.39479800  | -0.64227600 | 0.47624000  |
| C   | 3.36886600  | -1.64698700 | 0.53964600  |
| C   | 4.58203400  | -1.50555600 | -0.12117200 |
| H   | 5.80064700  | -0.22891900 | -1.36053600 |
| H   | 4.12547700  | 1.57895000  | -1.47556400 |
| C   | 1.13146400  | -0.83872900 | 1.23507500  |
| H   | 3.14493700  | -2.53414900 | 1.11911500  |
| H   | 5.31989900  | -2.29678500 | -0.07006800 |
| C   | 0.03624900  | 0.18035500  | 1.09974100  |
| C   | 0.20328200  | 1.43126500  | 0.47474200  |
| O   | 0.96600100  | -1.77413100 | 1.99115800  |
| S   | -0.97042300 | 2.77138600  | 0.66863800  |
| C   | -2.72185600 | 0.61975100  | 0.21439800  |
| C   | -2.44630700 | 2.04406300  | -0.16683900 |

|    |             |             |             |
|----|-------------|-------------|-------------|
| H  | -3.28459600 | 2.68549500  | 0.13080600  |
| H  | -2.32056400 | 2.13397800  | -1.24743500 |
| Cu | -1.22748700 | -0.53695100 | -0.35775800 |
| O  | -0.63054400 | -1.86703000 | -1.42016500 |
| H  | -3.04342000 | 0.39208000  | 1.22981800  |
| S  | 1.56696800  | 1.88995500  | -0.42587100 |
| O  | -3.25704700 | -0.12147900 | -0.78043800 |
| C  | -4.25531400 | -1.20772800 | -0.49471500 |
| H  | -5.08988600 | -0.70370400 | -0.00481600 |
| H  | -4.54426000 | -1.50958000 | -1.49826600 |
| C  | -3.68126400 | -2.35180600 | 0.30804100  |
| H  | -2.82262200 | -2.79715500 | -0.20068500 |
| H  | -3.40280400 | -2.05882600 | 1.32375000  |
| H  | -4.45477900 | -3.11971600 | 0.39867000  |
| H  | 0.25841000  | -2.22685900 | -1.38762400 |
| H  | -0.63601900 | 0.16552500  | 1.95401000  |

#### INT IV

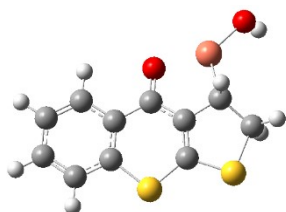

|     |            |             |             |
|-----|------------|-------------|-------------|
| 0 2 |            |             |             |
| C   | 4.48587200 | -1.15821800 | -0.07742000 |
| C   | 3.92822100 | 0.10831400  | -0.13012900 |
| C   | 2.53596300 | 0.26721900  | -0.05699600 |
| C   | 1.69964900 | -0.86345600 | 0.06839900  |
| C   | 2.29454700 | -2.13978600 | 0.11061300  |
| C   | 3.66646900 | -2.28923200 | 0.04210300  |
| H   | 5.56272900 | -1.26901900 | -0.13012100 |
| H   | 4.56527400 | 0.98028600  | -0.22772100 |

|    |             |             |             |
|----|-------------|-------------|-------------|
| C  | 0.24436100  | -0.74994900 | 0.15654100  |
| H  | 1.63784500  | -2.99573300 | 0.20181400  |
| H  | 4.10836700  | -3.27765000 | 0.08100500  |
| C  | 0.24682200  | 1.72703500  | 0.04686700  |
| O  | -0.49992700 | -1.77863700 | 0.15486400  |
| S  | -0.84084100 | 3.10437900  | 0.04148300  |
| C  | -1.84144700 | 0.59958000  | 0.50970300  |
| C  | -2.33102900 | 1.91177400  | -0.05171400 |
| H  | -3.14833800 | 2.36268500  | 0.50809900  |
| H  | -2.58678500 | 1.87606000  | -1.11091400 |
| Cu | -2.45291700 | -1.26582200 | -0.03640400 |
| O  | -4.17636800 | -1.73984400 | -0.31722700 |
| H  | -2.03491700 | 0.52510800  | 1.58829400  |
| S  | 1.94704100  | 1.93044400  | -0.20096700 |
| C  | -0.37939100 | 0.52307400  | 0.24334600  |
| H  | -4.55864900 | -1.52034200 | -1.17196900 |

#### 3a

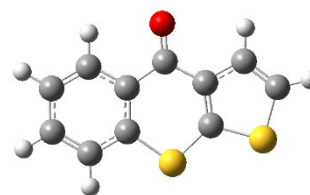

|     |             |             |             |
|-----|-------------|-------------|-------------|
| 0 1 |             |             |             |
| C   | -3.75741400 | -0.80137800 | -0.00012600 |
| C   | -2.55314100 | -1.48441100 | 0.00008000  |
| C   | -1.34051500 | -0.77615600 | 0.00011800  |
| C   | -1.33879500 | 0.63086900  | 0.00001400  |
| C   | -2.57887700 | 1.29598000  | -0.00017400 |
| C   | -3.77298900 | 0.59898900  | -0.00027900 |
| H   | -4.68715400 | -1.35877800 | -0.00014600 |
| H   | -2.54246200 | -2.56887300 | 0.00024100  |
| C   | -0.10992100 | 1.47741400  | 0.00017600  |

|   |             |             |             |
|---|-------------|-------------|-------------|
| H | -2.55673300 | 2.37870500  | -0.00020900 |
| H | -4.71582700 | 1.13296400  | -0.00048700 |
| C | 1.36038200  | -0.56863100 | 0.00003400  |
| O | -0.18584100 | 2.70150800  | 0.00035300  |
| S | 3.04393200  | -1.01419400 | -0.00011500 |
| C | 2.44497000  | 1.49998800  | -0.00010000 |
| C | 3.51586500  | 0.66967100  | -0.00018700 |
| H | 4.56626500  | 0.91687400  | -0.00028500 |
| H | 2.50141500  | 2.57932000  | -0.00014000 |
| S | 0.11618300  | -1.78317100 | 0.00015500  |
| C | 1.19033100  | 0.80192200  | 0.00003800  |

### H<sub>2</sub>O

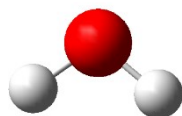

|     |            |             |             |
|-----|------------|-------------|-------------|
| 0 1 |            |             |             |
| O   | 0.00000000 | 0.00000000  | 0.11702500  |
| H   | 0.00000000 | -0.76350200 | -0.46810100 |
| H   | 0.00000000 | 0.76350200  | -0.46810100 |

### EtOH

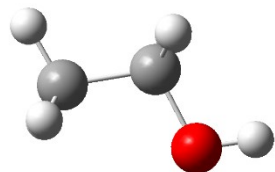

|     |            |             |             |
|-----|------------|-------------|-------------|
| 0 1 |            |             |             |
| C   | 1.17761300 | -0.40046800 | 0.00000000  |
| H   | 1.15176400 | -1.03993800 | 0.88567700  |
| H   | 1.15176400 | -1.03993800 | -0.88567700 |
| H   | 2.12018400 | 0.15445000  | 0.00000000  |
| C   | 0.00000000 | 0.55575100  | 0.00000000  |

|   |             |             |             |
|---|-------------|-------------|-------------|
| H | 0.03688200  | 1.20197800  | -0.88776800 |
| H | 0.03688200  | 1.20197800  | 0.88776800  |
| O | -1.20072100 | -0.22264800 | 0.00000000  |
| H | -1.95738800 | 0.37095300  | 0.00000000  |

### O<sub>2</sub>

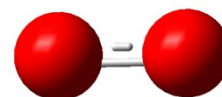

|     |            |            |             |
|-----|------------|------------|-------------|
| 0 1 |            |            |             |
| O   | 0.00000000 | 0.00000000 | 0.60272000  |
| O   | 0.00000000 | 0.00000000 | -0.60272000 |

### TS I

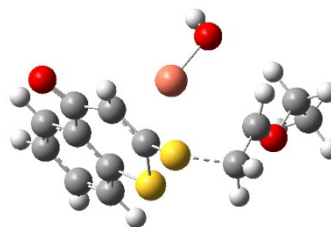

|     |             |             |             |
|-----|-------------|-------------|-------------|
| 0 2 |             |             |             |
| C   | -3.69819300 | 2.35788400  | -0.82196900 |
| C   | -2.49986300 | 1.88349000  | -1.33187400 |
| C   | -1.97248800 | 0.66853500  | -0.86947100 |
| C   | -2.65120200 | -0.06824800 | 0.11737800  |
| C   | -3.86396800 | 0.43553700  | 0.61672100  |
| C   | -4.38592200 | 1.63225700  | 0.15766600  |
| H   | -4.09738500 | 3.29787600  | -1.18539700 |
| H   | -1.96730800 | 2.44893200  | -2.08834000 |

|    |             |             |             |
|----|-------------|-------------|-------------|
| C  | -2.15691900 | -1.36021600 | 0.66855900  |
| H  | -4.37161500 | -0.14845000 | 1.37446700  |
| H  | -5.32041800 | 2.00768100  | 0.55719300  |
| C  | -0.79000900 | -1.80848700 | 0.31606700  |
| C  | 0.00743200  | -1.25811400 | -0.68343400 |
| O  | -2.84504300 | -2.04406700 | 1.41182800  |
| S  | 1.33531100  | -2.24472400 | -1.35568300 |
| C  | 3.09249500  | -0.22229100 | -0.38852700 |
| C  | 2.74555700  | -0.99122000 | -1.58933100 |
| H  | 3.53657100  | -1.67315300 | -1.91851100 |
| H  | 2.49433400  | -0.32767700 | -2.41590500 |
| Cu | 0.61394000  | -0.58216500 | 1.20955000  |
| O  | 1.49158300  | 0.25584400  | 2.56641100  |
| H  | 3.58439600  | -0.65632600 | 0.47434400  |
| S  | -0.47996500 | 0.13054300  | -1.65864400 |
| O  | 3.04908100  | 1.12161000  | -0.50515800 |
| C  | 3.51365200  | 1.87043400  | 0.64886800  |
| H  | 2.97352600  | 1.50533000  | 1.52784100  |
| H  | 4.58588400  | 1.67238200  | 0.76535800  |
| C  | 3.25273800  | 3.33873300  | 0.38713100  |
| H  | 3.76394400  | 3.67999200  | -0.51660900 |
| H  | 2.18261600  | 3.52745400  | 0.27572400  |
| H  | 3.61656700  | 3.92990000  | 1.23187700  |
| H  | 0.93226100  | 0.69656200  | 3.21207300  |
| H  | -0.52799300 | -2.78768200 | 0.70679300  |

**TS II**

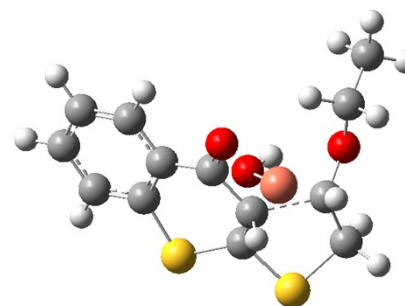

|     |             |             |             |
|-----|-------------|-------------|-------------|
| 0.2 |             |             |             |
| C   | 4.45174900  | -0.58729400 | -0.68314500 |
| C   | 3.65307600  | 0.52371900  | -0.45802500 |
| C   | 2.40068000  | 0.37899000  | 0.15144100  |
| C   | 1.94864700  | -0.89719600 | 0.54496300  |
| C   | 2.78320400  | -2.00408400 | 0.31091800  |
| C   | 4.01787900  | -1.85985700 | -0.29735900 |
| H   | 5.41136500  | -0.46237000 | -1.17209600 |
| H   | 3.98638200  | 1.50613000  | -0.77285300 |
| C   | 0.66756100  | -1.13820600 | 1.26079900  |
| H   | 2.42266700  | -2.97515500 | 0.62728400  |
| H   | 4.64290400  | -2.72691400 | -0.47576100 |
| C   | -0.34628800 | -0.02262000 | 1.41286200  |
| C   | -0.10648800 | 1.28072100  | 0.71923300  |
| O   | 0.42375900  | -2.21266500 | 1.79026200  |
| S   | -1.37956500 | 2.47858800  | 0.95059600  |
| C   | -2.18644800 | -0.22989200 | 0.89558400  |
| C   | -2.70318800 | 1.16686300  | 0.72096800  |
